# Supplementary material for: Reusable Co-catalysts for general and selective α-alkylation of nitriles with alcohols
Source: Royal Society of Chemistry journal article supplement (doi:10.1039/d3gc04436j), 2024-01-01

## Supporting information

# Reusable cobalt catalysts for general and selective $\alpha$ -alkylation of nitriles with alcohols

Zhuang Ma,<sup>a</sup> Zechen Wu,<sup>a</sup> Carsten Kreyenschulte,<sup>a</sup> Stephan Bartling,<sup>a</sup> Henrik Lund,<sup>a</sup> Matthias Beller\*<sup>a</sup> and Rajenahally V. Jagadeesh\*<sup>a,b</sup>

[<sup>a</sup>] Leibniz-Institut für Katalyse e.V., Albert-Einstein-Str. 29a, Rostock, D-18059, Germany

[<sup>b</sup>] Nanotechnology Centre, Centre of Energy and Environmental Technologies, VŠB Technical University of Ostrava, Ostrava-Poruba, Czech Republic

\*Corresponding authors

E-mails: [matthias.beller@catalysis.de](mailto:matthias.beller@catalysis.de); [jagadeesh.rajenahally@catalysis.de](mailto:jagadeesh.rajenahally@catalysis.de).

### Table of contents

S1. Materials and methods

S2. Procedure for the preparation of catalysts

S3. Characterization of catalysts

S4. General procedure for the  $\alpha$ -alkylation of nitriles with alcohols

S5. Catalyst recycling

S6. NMR data

S7. NMR spectra

## **S1. Materials and methods**

Alcohols and nitriles were obtained commercially from various chemical companies. Cobalt(II) chloride hexahydrate (cat no.255599-100G), zinc(II) chloride (cat no.208086-100G) and silica suspension (Silica LUDOX® AS-40 colloidal silica, cat no. 420840-1L) were purchased from Sigma Aldrich. D-Glucosamine hydrochloride (cat no. A15532-250G) was purchased from Alfa Aesar. Unless otherwise stated all reagents were used directly without purification.

The pyrolysis experiments were carried out in Dekema Austromat 624 oven. All catalytic experiments were carried out in ACS pressure tubes.

GC and GC-MS analysis were recorded on Agilent 6890N instrument. GC conversion and yields were determined by GC-FID, HP6890 chromatograph with FID detector, column HP 530 m x 250 mm x 0.25  $\mu\text{m}$ .

NMR spectra are recorded using Bruker 300 Fourier, Bruker AV 300 and Bruker AV 400 spectrometers. Chemical shifts are reported in ppm relative to the deuterated solvent. Coupling constants are expressed in Hertz (Hz). The following abbreviations are used: s = singlet, bs = broad singlet d = doublet, t = triplet and m = multiple. The residual solvent signals were used as references for  $^1\text{H}$  and  $^{13}\text{C}$  NMR spectra ( $\text{CDCl}_3$ :  $\delta\text{H} = 7.26$  ppm,  $\delta\text{C} = 77.12$  ppm;  $\text{DMSO-d}_6$ :  $\delta\text{H} = 2.50$  ppm,  $\delta\text{C} = 39.52$  ppm).

XRD powder pattern were recorded on a Panalytical X'Pert diffractometer equipped with a Xcelerator detector using automatic divergence slits and  $\text{Cu } \alpha_1/\alpha_2$  radiation (40 kV, 40 mA;  $\lambda = 0.15406$  nm, 0.154443 nm).  $\text{Cu}$  beta-radiation was excluded using a nickel filter foil. The measurements were performed in  $0.0167^\circ$  steps and 100 s of data collecting time per step. The samples were mounted on silicon zero background holders. The obtained intensities were converted from automatic to fixed divergence slits ( $0.25^\circ$ ) for further analysis. Peak positions and profile were fitted with Pseudo-Voigt function using the High Score Plus software package (Panalytical). Phase identification was done by using the PDF-2 database of the International Center of Diffraction Data (ICDD).

Scanning transmission electron microscopy (STEM) measurements were performed with a probe aberration-corrected JEM-ARM200F (JEOL, Corrector: CEOS) at 200 kV. The microscope was equipped with an Enfinium ER (GATAN) electron energy-loss spectrometer and a JEOL SDD detector for chemical analysis. High-Angle Annular Dark Field (HAADF) and Annular Bright Field (ABF) detectors were used for general imaging. The solid samples were deposited without any

pretreatment on a holey carbon supported Cu-grid (mesh 300) and transferred to the microscope. The X-ray Photoelectron Spectroscopy (XPS) measurements were performed on an ESCALAB 220iXL (Thermo Fisher Scientific) with monochromated Al K $\alpha$  radiation (E = 1486.6 eV). Samples are prepared on a stainless-steel holder with conductive double-sided adhesive carbon tape. The electron binding energies were obtained with charge compensation using a flood electron source and referenced to the C 1s core level of adventitious carbon at 284.8 eV (C-C and C-H bonds) for the insulating samples containing Si. For the conductive samples after the removal of SiO<sub>2</sub> no charge referencing was applied, resulting in a C 1s main peak at around 284.7 eV. For quantitative analysis the peaks were deconvoluted with Gaussian-Lorentzian curves using the software Unifit 2021. The peak areas were normalized by the transmission function of the spectrometer and the element specific sensitivity factor of Scofield.

## **S2. Procedure for the preparation of catalysts**

In a 100 mL dried round bottomed flask, 291.1 mg CoCl<sub>2</sub>·6H<sub>2</sub>O (1 mmol), 272.6 mg ZnCl<sub>2</sub> (2 mmol), and 2156.4 mg D-glucosamine hydrochloride (DGA; 10 mmol,) were dissolved in 20 mL deionized water by stirring for 30 minutes at room temperature. To this solution, 5 g colloidal silica aqueous solution (Ludox HS-40, 40 wt%,) was added and continued stirring for another 12 hours at room temperature. Then, the reaction mixture was subject to freeze drying to remove the water. The obtained solid material was grounded to a fine powder and transferred to crucible. The crucible was closed with a lid and placed in a pyrolysis oven and then heated to the defined temperature (800- 1000 °C) for 3 h at the heating rate of 5 °C/min under Argon gas. After the completion of pyrolysis, the oven was cooled down to room temperature and the material was removed from the oven (Co@PNC-900-SiO<sub>2</sub>). Next, the pyrolyzed materials were etched in 5 M NH<sub>4</sub>HF<sub>2</sub> aqueous solution at room temperature for 24 h to remove the SiO<sub>2</sub> template and larger particles. Finally, the resulting catalytic material was filtered and washed subsequently with deionized water and ethanol several times and finally dried under vacuum (Co@PNC-900). Elemental Analysis of optimal catalyst, Co@PNC-900: Co = 1.23 wt% (1.26 wt% was measured by ICP-OES), C = 70 wt%, N = 6.9 wt%, H = 0.68 wt%, Si = 0.34wt%. Other materials such as Co@NC-900 in the absence of ZnCl<sub>2</sub>, porous N-C material without the addition of cobalt precursors and Co-particles-900 without glucose amine were also prepared using similar procedure.

### S3. Characterization of catalysts

#### XRD patterns

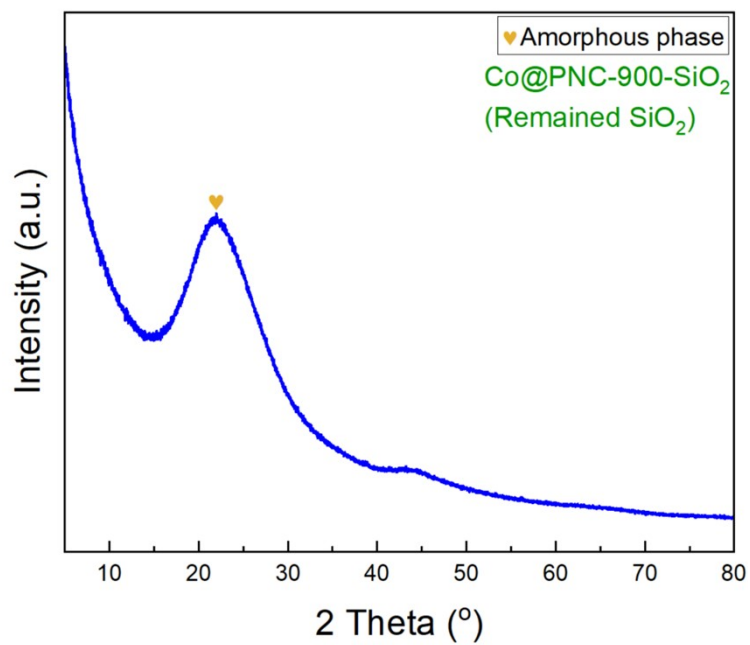

**Figure S1.** XRD pattern of Co@PNC-900-SiO<sub>2</sub> catalyst.

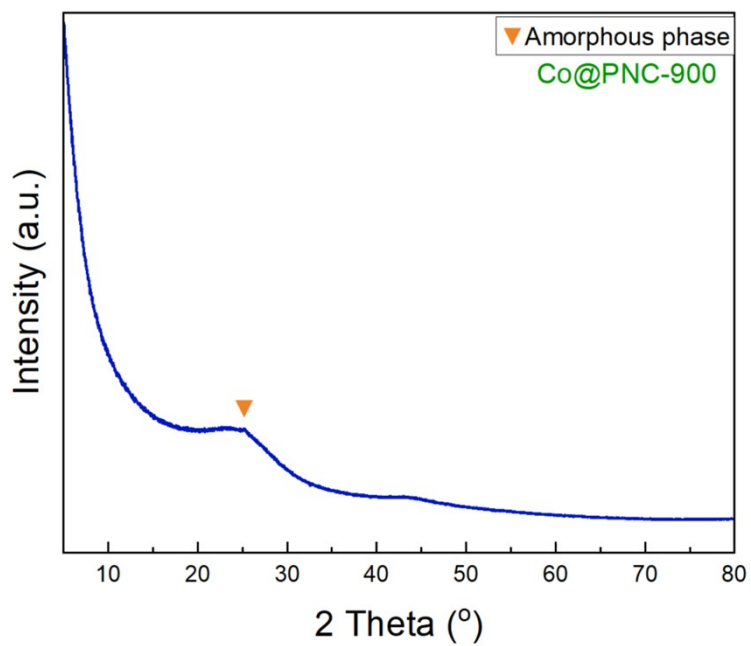

**Figure S2.** XRD pattern of Co@PNC-900 catalyst.

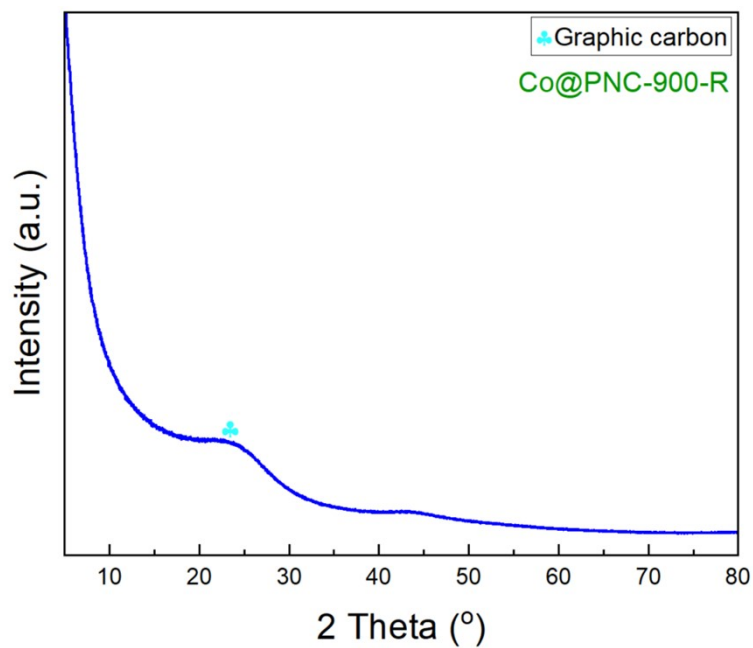

**Figure S3.** XRD pattern of Co@PNC-900-R (recycled) catalyst.

**STEM images**

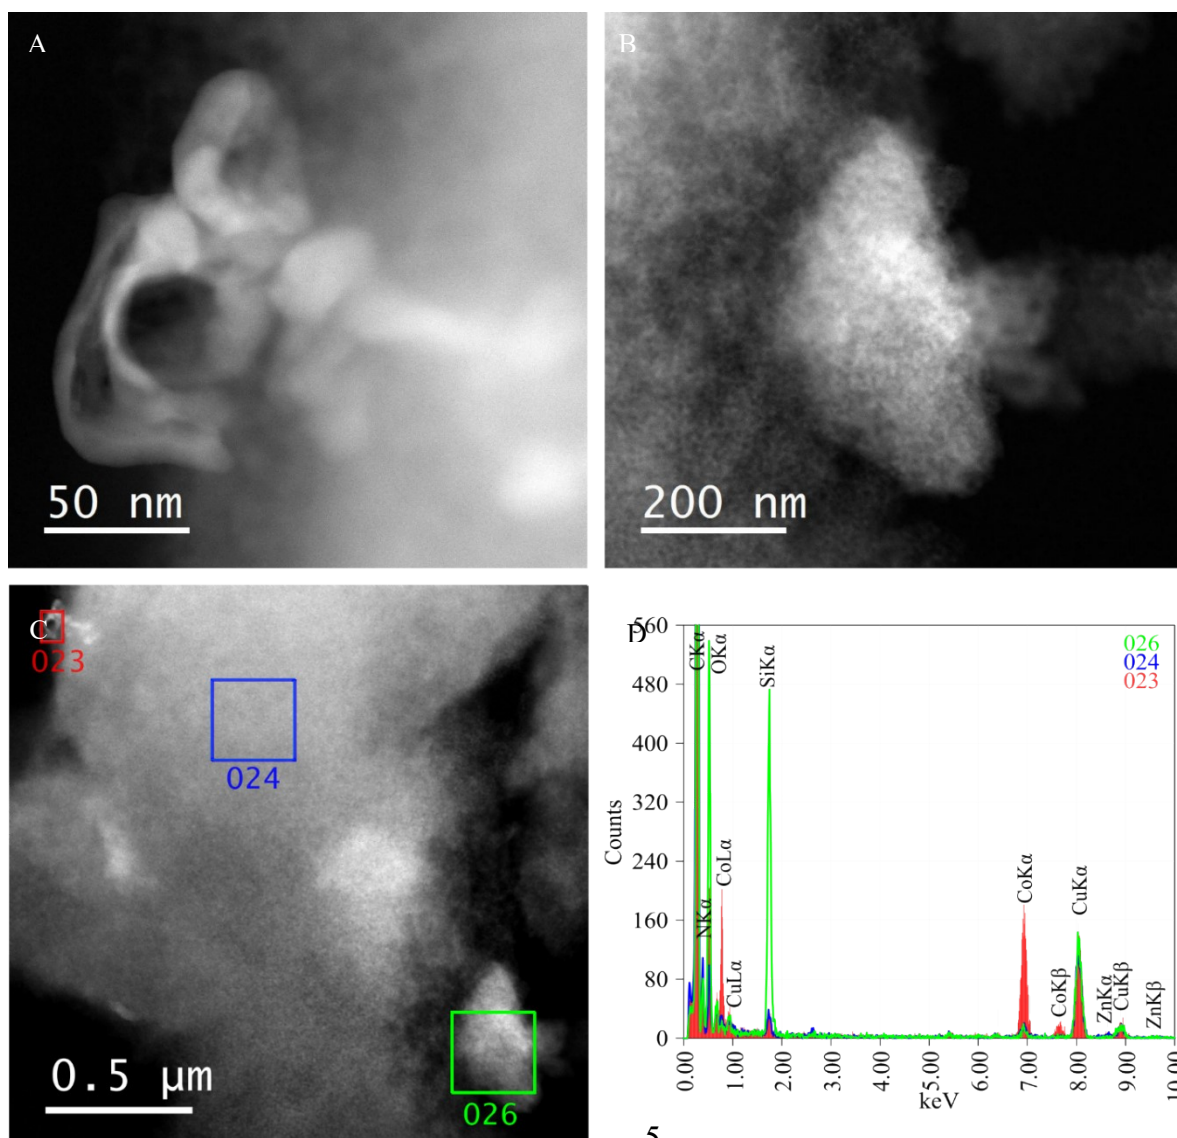

**Figure S4.** STEM-HAADF images (A-C) of Co@PNC-900 and corresponding EDX spectra (D) of marked regions showing examples of the few Co oxide and SiO<sub>2</sub> particles found in the specimen.

**XPS data and spectra**

**Table S1.** Surface composition of different cobalt samples obtained by XPS. All values are given in at.%.

| <b>Catalyst</b>             | <b>C</b> | <b>O</b> | <b>N</b> | <b>Co</b> | <b>Si</b> | <b>F</b> | <b>Na</b> |
|-----------------------------|----------|----------|----------|-----------|-----------|----------|-----------|
| CO@PNC-900-SiO <sub>2</sub> | 43.3     | 30.7     | 6.2      | 0.4       | 17.9      | 0.7      | 0.7       |
| CO@PNC-900                  | 80.9     | 6.6      | 11.5     | 0.4       | 0.6       | -        | -         |
| CO@PNC-900-R                | 82.43    | 6.03     | 10.72    | 0.3       | 0.5       | -        | -         |

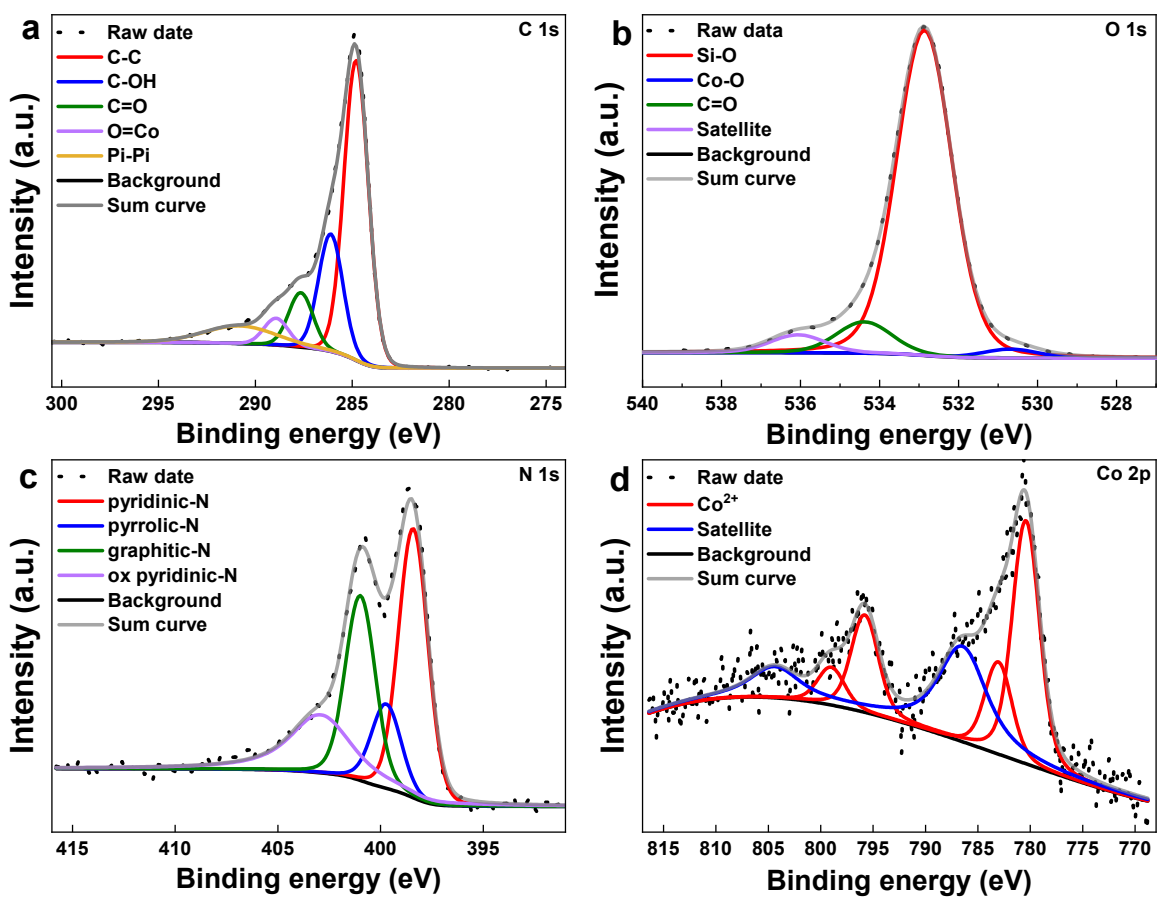

**Figure S5.** X-ray photoelectron spectra for Co@PNC-900-SiO<sub>2</sub>. (a) C 1s, (b) O 1s, (c) N 1s, (d) Co 2p region.

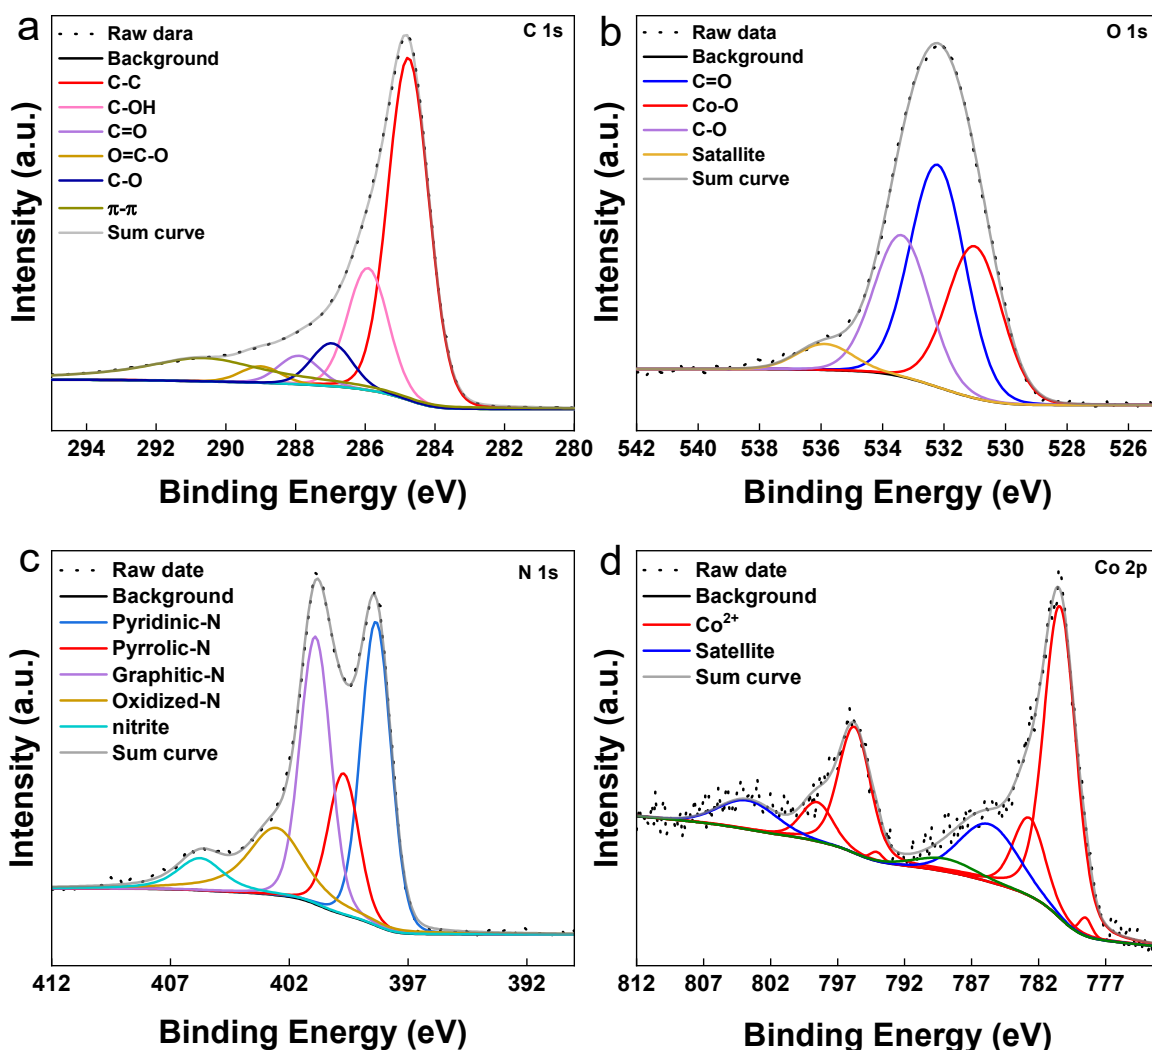

**Figure S6.** X-ray photoelectron spectra for Co@PNC-900-R. (a) C 1s, (b) O 1s, (c) N 1s, (d) Co 2p region.

#### **S4. General procedure for the $\alpha$ -alkylation of nitriles with alcohols**

The magnetic stirring bar, 0.5 mmol nitrile and 1 mmol alcohol, 50 mg catalyst (Co@PNC-900, 2.04 mol% Co) and 0.5 mmol  $K_3PO_4$  (1.0 equiv) were transferred to 20 mL pressure tube. Then, 2 mL dry toluene was added, and the pressure tube was flushed with argon and fitted with screw cap. The pressure tube containing reaction mixture was placed into an aluminum block and reaction was allowed to progress under stirred condition at 140 °C for 24 h. After the completion of the reaction, the pressure tube was cooled to room temperature and the cap was slowly removed. Then, the reaction products were removed from the pressure tube, and the solid catalyst was filtered off and washed thoroughly with ethyl acetate. The reaction products were analyzed by GC-MS. The corresponding



products were purified by column chromatography (silica; pentene-ethyl acetate mixture) and characterized by NMR and GCMS spectral analysis. Following procedure is applied for determining the conversion and yields by GC: After completion of the reaction, n-hexadecane (50  $\mu$ L) as standard was added to the reaction pressure tube and the reaction products were diluted with ethyl acetate followed by filtration using plug of silica. Then the filtrate containing products were analyzed by GC.

**Table S2.** Co-catalyzed  $\alpha$ -alkylation of phenyl acetonitrile with benzyl alcohol: Testing of different solvents.

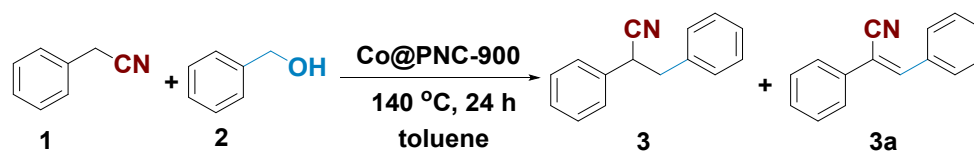

| Entry          | Solvent     | Conv. of 1 (%) | Yield of 3 (%) | Yield of 3a (%) |
|----------------|-------------|----------------|----------------|-----------------|
| 1              | THF         | 70             | 62             | 7               |
| 2              | Toluene     | 99             | 95             | 3               |
| 3              | 1,4-dioxane | 67             | 55             | 11              |
| 4              | t-BuOH      | 85             | 78             | 5               |
| 5              | P-xylene    | 96             | 85             | 10              |
| 6              | MeCN        | 54             | 43             | 9               |
| 7 <sup>b</sup> | Toluene     | 61             | 50             | 7               |
| 8 <sup>c</sup> | Toluene     | 74             | 60             | 10              |

**Reaction conditions:** 0.5 mmol phenyl acetonitrile, 1 mmol benzyl alcohol, 50 mg Co@PNC-900 (2.04 mol% Co), 0.5 mmol K<sub>3</sub>PO<sub>4</sub>, 2 mL solvent, 140 °C, 24 h. <sup>b</sup>: same as “a” with 50 mg Co@PNC-700; <sup>c</sup>: same as “a” with 50 mg Co@PNC-800; conversion and yields are based on phenyl acetonitrile and determined by GC using n-hexadecane as standard.

**Table S3.** Co-catalyzed  $\alpha$ -alkylation of phenyl acetonitrile with benzyl alcohol: Testing of different bases.

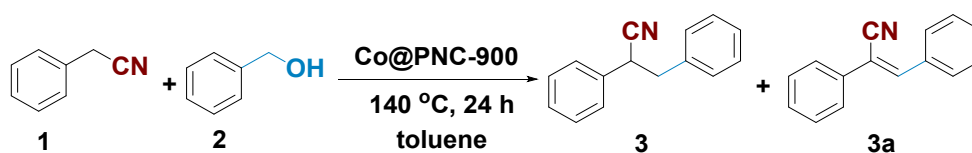

| Entry | Base                            | Conv. 1 (%) | Yield 3 (%) | Yield 3a (%) |
|-------|---------------------------------|-------------|-------------|--------------|
| 1     | KOH                             | 82          | 78          | 3            |
| 2     | K <sub>3</sub> PO <sub>4</sub>  | 99          | 95          | 3            |
| 3     | K <sub>2</sub> CO <sub>3</sub>  | 20          | 10          | 8            |
| 4     | Cs <sub>2</sub> CO <sub>3</sub> | 76          | 68          | 5            |

**Reaction conditions:** 0.5 mmol phenyl acetonitrile, 1 mmol benzyl alcohol, 50 mg catalyst (2.04 mol% Co), 0.5 mmol base, 2 mL toluene, 140 °C, 24 h, conversion and yields are based on phenyl acetonitrile and determined by GC using n-hexadecane as standard.

**Table S4.** Co-catalyzed  $\alpha$ -alkylation of phenyl acetonitrile with benzyl alcohol with different amounts of benzyl alcohol<sup>a</sup>.

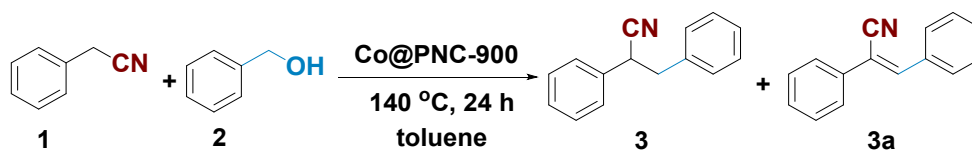

| Entry          | Benzyl alcohol    | Conv. 1 (%) | Yield 3 (%) | Yield 3a (%) |
|----------------|-------------------|-------------|-------------|--------------|
| 1              | 0.5 mmol (1 eq)   | 76          | 71          | 3            |
| 2              | 0.7 mmol (1.4 eq) | 85          | 82          | --           |
| 3              | 1 mmol (2 eq)     | 99          | 95          | 3            |
| 4 <sup>b</sup> | 1 mmol (2 eq)     | 90          | 80          | 8            |
| 5 <sup>c</sup> | 1 mmol (2 eq)     | 71          | 60          | 10           |

**Reaction conditions<sup>a</sup>:** 0.5 mmol phenyl acetonitrile, 0.5-1 mmol benzyl alcohol, 50 mg catalyst (2.04 mol% Co), 0.5 K<sub>3</sub>PO<sub>4</sub>, 2 mL toluene, 140 °C, 24 h. <sup>b</sup>: 130 °C; <sup>c</sup>: 120 °C. conversion and yields are based on phenyl acetonitrile and determined by GC using n-hexadecane as standard.

**Table S5.** Comparison of TON value of our Co-catalyst with previously reported heterogeneous catalysts.

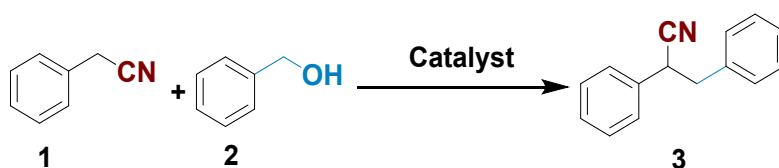

| Entry | Catalyst   | Reaction conditions | Yield. % | Sel. % | TON (TOF h <sup>-1</sup> ) | Ref.      |
|-------|------------|---------------------|----------|--------|----------------------------|-----------|
| 1     | Cp@PNC-900 | 140 °C, 24 h        | 99%      | 95%    | 43 (1.8)                   | This work |
| 2     | Ru/HT      | 180 °C, 20 h        | 91%      | -      | 121 (6)                    | (28)      |
| 3     | Ru/HT      | 180 °C, 20 h.       | 77%      | -      | 103 (5.1)                  | (29)      |
| 4     | Pd/MgO     | 180 °C, 24 h        | 94%      | 95%    | 436 (18.1)                 | (30)      |

HT: Hydrotalcite; TON: mmol of desired product 3/mmol of catalyst; TOF: TON/time.

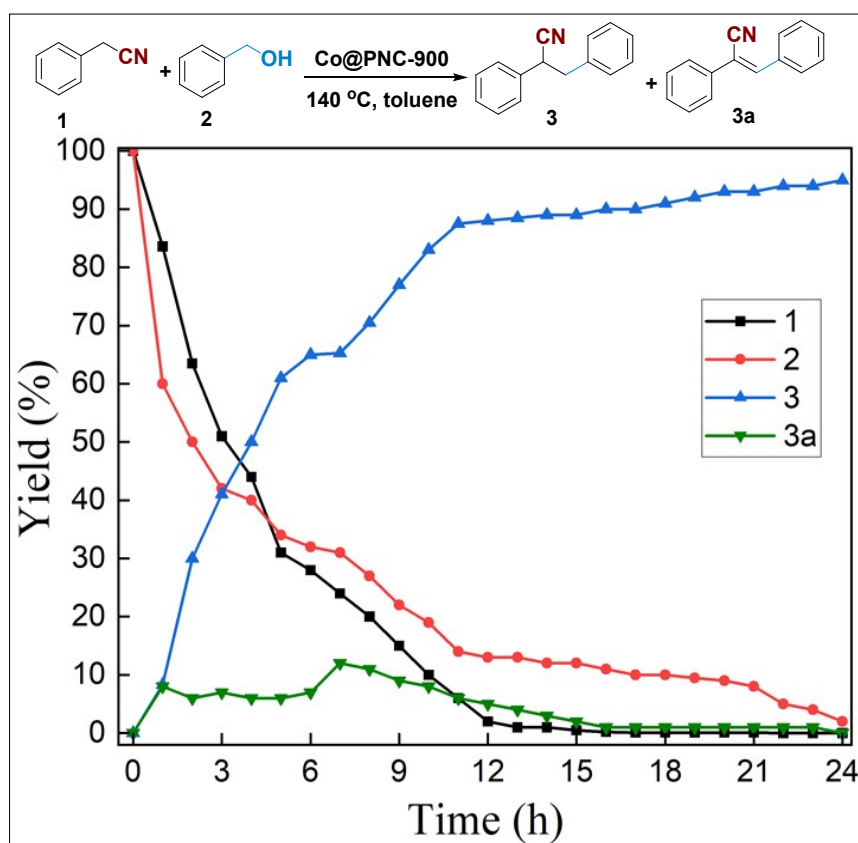

**Figure S7.** Co-catalyzed  $\alpha$ -alkylation of phenyl acetonitrile with benzyl alcohol: Reaction progress with time. **Reaction conditions:** 0.5 mmol phenyl acetonitrile, 1 mmol benzyl alcohol, 50 mg catalyst (2.04 mol% Co), 0.5 mmol K<sub>3</sub>PO<sub>4</sub>, 2 mL toluene, 140 °C, 1-24 h, conversion and yields are based on phenyl acetonitrile and determined by GC using n-hexadecane as standard.

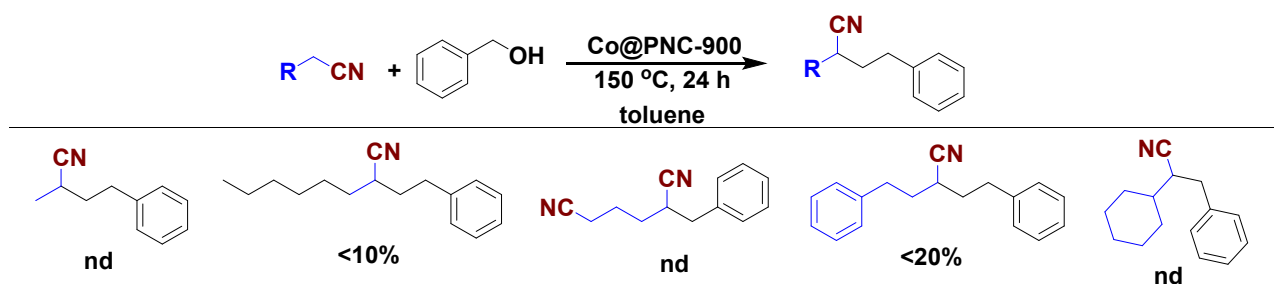

**Scheme S1.** Failed examples. **Reaction conditions:** 0.5 mmol nitrile, 1.0 mmol alcohol, 70 mg catalyst (2.86 mol% Co), 0.5 K<sub>3</sub>PO<sub>4</sub>, 2 mL toluene, 150 °C, 24 h. conversion and yields are based on phenyl acetonitrile and determined by GC using n-hexadecane as standard.

### S5. Catalyst recycling

The magnetic stirring bar, 1.5 mmol phenyl acetonitrile and 3 mmol benzyl alcohol, 160 mg Co@PNC-900 and 1.5 mmol K<sub>3</sub>PO<sub>4</sub> were transferred to 20 mL pressure tube and 4 mL dry toluene was added. The pressure tube was flushed with argon and closed with screw cap. Then, it was placed into an aluminum block and heated to 140 °C for desired time. After the completion of the reaction, the pressure tube was cooled down to room temperature. To the reaction products, 150 μL n-hexadecane as standard was added. The catalyst was separated by centrifugation and the centrifugate containing reaction products was subjected to GC analysis. The separated catalyst was washed with water, methanol and ethyl acetate and then dried under vacuum. The dried catalyst was used for the next run without further purification or reactivation.

## S6. NMR data

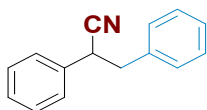

**2,3-diphenylpropanenitrile<sup>1</sup>:** <sup>1</sup>H NMR (300 MHz, CDCl<sub>3</sub>) δ 7.32 – 7.26 (m, 3H), 7.26 – 7.18 (m, 5H), 7.12 – 7.06 (m, 2H), 3.95 (dd, *J* = 8.2, 6.5 Hz, 1H), 3.20 – 3.03 (m, 2H).

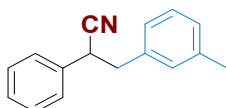

**2-phenyl-3-(m-tolyl)propanenitrile<sup>2</sup>:** <sup>1</sup>H NMR (300 MHz, CDCl<sub>3</sub>) δ 7.41 – 7.26 (m, 5H), 7.19 (td, *J* = 7.4, 0.7 Hz, 1H), 7.11 – 7.06 (m, 1H), 7.00 – 6.90 (m, 2H), 3.99 (dd, *J* = 8.4, 6.5 Hz, 1H), 3.20 – 3.05 (m, 2H), 2.32 (d, *J* = 0.7 Hz, 3H).

<sup>13</sup>C NMR (75 MHz, CDCl<sub>3</sub>) δ 138.33, 136.27, 135.40, 129.95, 129.02, 128.52, 128.19, 128.13, 127.49, 126.20, 112.27, 42.23, 39.90, 21.36.

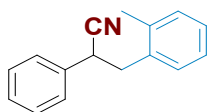

**2-phenyl-3-(o-tolyl)propanenitrile<sup>2</sup>:** <sup>1</sup>H NMR (300 MHz, CDCl<sub>3</sub>) δ 7.38 – 7.26 (m, 5H), 7.20 – 7.11 (m, 4H), 3.96 (dd, *J* = 8.7, 6.6 Hz, 1H), 3.30 – 3.08 (m, 2H), 2.23 (s, 3H).

<sup>13</sup>C NMR (75 MHz, CDCl<sub>3</sub>) δ 136.29, 135.48, 134.70, 130.61, 130.07, 129.08, 128.25, 127.56, 127.41, 126.30, 120.50, 39.52, 38.78, 19.25.

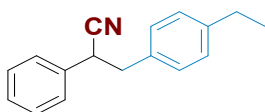

**3-(4-ethylphenyl)-2-phenylpropanenitrile<sup>6</sup>:** <sup>1</sup>H NMR (300 MHz, CDCl<sub>3</sub>) δ 7.31 – 7.14 (m, 5H), 7.07 – 6.95 (m, 4H), 3.94 – 3.81 (m, 1H), 3.10 – 2.95 (m, 2H), 2.53 (q, *J* = 7.6 Hz, 2H), 1.13 (t, *J* = 7.6 Hz, 3H).

<sup>13</sup>C NMR (75 MHz, CDCl<sub>3</sub>) δ 143.41, 135.46, 133.58, 129.19, 129.05, 128.20, 128.16, 127.53, 120.54, 41.92, 40.00, 28.53, 15.57.

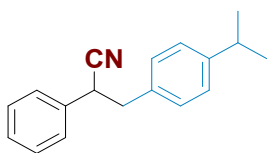

**3-(4-isopropylphenyl)-2-phenylpropanenitrile<sup>6</sup>:**  $^1\text{H NMR}$  (300 MHz,  $\text{CDCl}_3$ )  $\delta$  7.32 – 7.13 (m, 5H), 7.11 – 6.97 (m, 4H), 3.94 – 3.84 (m, 1H), 3.13 – 2.97 (m, 2H), 2.87 – 2.77 (m, 1H), 1.16 (d,  $J = 6.9$  Hz, 6H).

$^{13}\text{C NMR}$  (75 MHz,  $\text{CDCl}_3$ )  $\delta$  148.05, 135.52, 133.74, 129.15, 129.05, 128.19, 127.51, 126.73, 120.55, 41.94, 40.02, 33.80, 24.01.

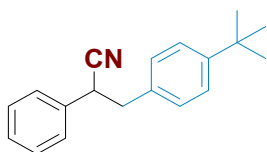

**3-(4-(tert-butyl)phenyl)-2-phenylpropanenitrile:**  $^1\text{H NMR}$  (300 MHz,  $\text{CDCl}_3$ )  $\delta$  7.32 – 7.15 (m, 7H), 7.06 – 6.99 (m, 2H), 3.94 – 3.82 (m, 1H), 3.12 – 2.96 (m, 2H), 1.23 (s, 9H).

$^{13}\text{C NMR}$  (75 MHz,  $\text{CDCl}_3$ )  $\delta$  150.33, 135.56, 133.40, 129.06, 128.88, 128.20, 127.49, 125.60, 120.57, 41.84, 40.00, 34.53, 31.38.

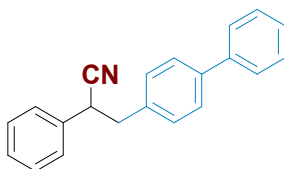

**3-([1,1'-biphenyl]-4-yl)-2-phenylpropanenitrile:**  $^1\text{H NMR}$  (300 MHz,  $\text{CDCl}_3$ )  $\delta$  7.62 – 7.51 (m, 4H), 7.48 – 7.41 (m, 2H), 7.39 – 7.29 (m, 5H), 7.25 – 7.19 (m, 2H), 4.05 (dd,  $J = 8.2, 6.5$  Hz, 1H), 3.30 – 3.15 (m, 2H).

$^{13}\text{C NMR}$  (75 MHz,  $\text{CDCl}_3$ )  $\delta$  140.63, 140.30, 135.30, 135.21, 129.68, 129.09, 128.81, 128.28, 127.54, 127.38, 127.34, 127.06, 120.40, 41.89, 39.82.

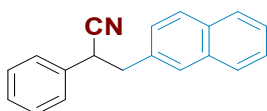

**3-(Naphthalen-2-yl)-2-phenylpropanenitrile<sup>1</sup>:**  $^1\text{H NMR}$  (300 MHz,  $\text{CDCl}_3$ )  $\delta$  7.89 – 7.71 (m, 3H), 7.61 (dd,  $J = 1.8, 1.0$  Hz, 1H), 7.54 – 7.42 (m, 2H), 7.42 – 7.24 (m, 6H), 4.11 (dd,  $J = 8.1, 6.6$  Hz,

1H), 3.47 – 3.23 (m, 2H).

<sup>13</sup>C NMR (75 MHz, CDCl<sub>3</sub>) δ 135.22, 133.74, 133.40, 132.61, 129.08, 128.36, 128.27, 128.15, 127.76, 127.68, 127.54, 127.12, 126.25, 125.96, 120.40, 42.39, 39.77.

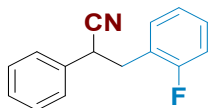

**3-(2-fluorophenyl)-2-phenylpropanenitrile:** <sup>1</sup>H NMR (300 MHz, CDCl<sub>3</sub>) δ 7.31 – 7.18 (m, 7H), 7.12 – 7.06 (m, 1H), 7.04 – 6.95 (m, 2H), 4.01 (dd, *J* = 8.5, 6.9 Hz, 1H), 3.20 – 3.07 (m, 2H).

<sup>13</sup>C NMR (75 MHz, CDCl<sub>3</sub>) δ 162.84, 159.59, 135.19, 131.66, 131.60, 129.52, 129.41, 129.18, 129.12, 128.35, 127.97, 127.40, 124.38, 124.33, 123.65, 123.45, 120.21, 115.65, 115.37, 38.35, 38.32, 35.98, 35.96.

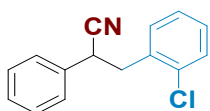

**3-(2-chlorophenyl)-2-phenylpropanenitrile:** <sup>1</sup>H NMR (400 MHz, CDCl<sub>3</sub>) δ 7.48 – 7.39 (m, 6H), 7.32 – 7.26 (m, 3H), 4.24 (dd, *J* = 9.6, 6.1 Hz, 1H), 3.42 – 3.25 (m, 2H).

<sup>13</sup>C NMR (101 MHz, CDCl<sub>3</sub>) δ 135.30, 134.21, 134.05, 131.86, 129.77, 129.17, 129.15, 128.35, 127.34, 127.21, 120.17, 40.48, 37.68.

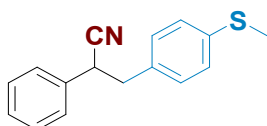

**3-(4-(methylthio)phenyl)-2-phenylpropanenitrile:** <sup>1</sup>H NMR (300 MHz, CDCl<sub>3</sub>) δ 7.38 (dddd, *J* = 8.5, 4.7, 3.2, 1.6 Hz, 3H), 7.30 – 7.26 (m, 2H), 7.19 (td, *J* = 5.5, 2.2 Hz, 2H), 7.11 – 7.02 (m, 2H), 4.00 (dd, *J* = 8.0, 6.6 Hz, 1H), 3.25 – 3.07 (m, 2H), 2.49 (s, 3H).

<sup>13</sup>C NMR (75 MHz, CDCl<sub>3</sub>) δ 137.63, 135.07, 132.97, 129.72, 129.06, 128.25, 127.51, 126.70, 120.31, 41.66, 39.78, 15.79.

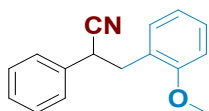

**3-(2-Methoxyphenyl)-2-phenylpropanenitrile<sup>1</sup>:** <sup>1</sup>H NMR (300 MHz, CDCl<sub>3</sub>) δ 7.41 – 7.26 (m, 6H), 7.10 (ddd, *J* = 7.5, 1.4, 0.8 Hz, 1H), 6.93 – 6.87 (m, 2H), 4.19 (dd, *J* = 8.9, 6.5 Hz, 1H), 3.86 (s, 3H), 3.24 – 3.11 (m, 2H).

<sup>13</sup>C NMR (75 MHz, CDCl<sub>3</sub>) δ 157.46, 136.09, 131.21, 128.93, 128.88, 127.99, 127.41, 124.96, 120.87, 120.65, 110.35, 55.33, 37.79, 37.69.

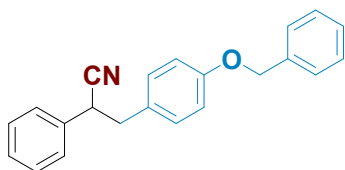

**3-(4-(benzyloxy)phenyl)-2-phenylpropanenitrile:** <sup>1</sup>H NMR (300 MHz, CDCl<sub>3</sub>) δ 7.49-7.34 (m, 8H), 7.31-7.28 (m, 1H), 7.11-7.03 (m, 3H), 6.98 – 6.90 (m, 2H), 6.79 – 6.72 (m, 1H), 5.07 (s, 2H), 3.99 (dd, *J* = 8.0, 6.6 Hz, 1H), 3.21-3.06 (m, 2H).

<sup>13</sup>C NMR (75 MHz, CDCl<sub>3</sub>) δ 158.16, 153.56, 136.97, 135.26, 130.41, 130.07, 129.73, 129.07, 128.66, 128.23, 128.07, 127.58, 120.57, 115.19, 115.03, 70.09, 41.43, 40.07, 20.54.

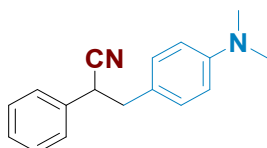

**3-(4-(dimethylamino)phenyl)-2-phenylpropanenitrile:** <sup>1</sup>H NMR (300 MHz, CDCl<sub>3</sub>) δ 7.42 – 7.27 (m, 5H), 7.06 – 7.00 (m, 2H), 6.72 – 6.65 (m, 2H), 3.95 (dd, *J* = 8.2, 6.5 Hz, 1H), 3.19 – 3.03 (m, 2H), 2.95 (s, 6H). <sup>1</sup>H NMR (300 MHz, CDCl<sub>3</sub>) δ 7.42 – 7.27 (m, 5H), 7.06 – 7.00 (m, 2H), 6.72 – 6.65 (m, 2H), 3.95 (dd, *J* = 8.2, 6.5 Hz, 1H), 3.19 – 3.03 (m, 2H), 2.95 (s, 6H).

<sup>13</sup>C NMR (75 MHz, CDCl<sub>3</sub>) δ 149.88, 135.68, 129.95, 128.97, 128.05, 127.58, 124.09, 120.79, 112.66, 41.52, 40.63, 40.33.



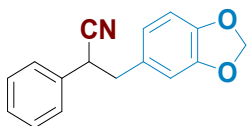

**3-(benzodioxol-5-yl)-2-phenylpropanenitrile<sup>1</sup>:** <sup>1</sup>H NMR (300 MHz, CDCl<sub>3</sub>) δ 7.28 – 7.25 (m, 2H), 7.21 – 7.16 (m, 2H), 6.66 – 6.60 (m, 1H), 6.55 – 6.48 (m, 2H), 5.84 (s, 2H), 3.91 – 3.84 (m, 1H), 3.02 – 2.93 (m, 2H).

<sup>13</sup>C NMR (75 MHz, CDCl<sub>3</sub>) δ 147.77, 146.90, 135.16, 129.97, 129.07, 128.26, 127.50, 122.53, 120.40, 109.51, 108.38, 101.09, 41.95, 40.04.

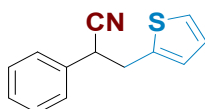

**2-phenyl-3-(thiophen-2-yl)propanenitrile:** <sup>1</sup>H NMR (300 MHz, CDCl<sub>3</sub>) δ 7.39 – 7.33 (m, 3H), 7.32 – 7.28 (m, 2H), 7.18 (dd, *J* = 5.1, 1.2 Hz, 1H), 6.93 (dd, *J* = 5.1, 3.5 Hz, 1H), 6.88 – 6.82 (m, 1H), 4.09 – 4.01 (m, 1H), 3.49 – 3.31 (m, 2H).

<sup>13</sup>C NMR (75 MHz, CDCl<sub>3</sub>) δ 137.92, 134.74, 129.12, 128.44, 127.48, 127.00, 124.94, 120.13, 40.11, 36.21.

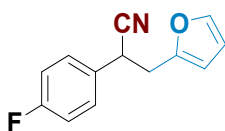

**2-(4-fluorophenyl)-3-(furan-2-yl)propanenitrile<sup>4</sup>:** <sup>1</sup>H NMR (400 MHz, CDCl<sub>3</sub>) δ 7.35 (dd, *J* = 1.9, 0.8 Hz, 1H), 7.28 – 7.21 (m, 2H), 7.10 – 7.01 (m, 2H), 6.29 (dd, *J* = 3.2, 1.9 Hz, 1H), 6.10 (dq, *J* = 3.2, 0.8 Hz, 1H), 4.14 (dd, *J* = 8.0, 6.8 Hz, 1H), 3.31 – 3.08 (m, 2H).

<sup>13</sup>C NMR (101 MHz, CDCl<sub>3</sub>) δ 163.76, 161.30, 149.64, 142.27, 130.66, 130.62, 129.11, 129.02, 119.97, 116.20, 115.98, 110.56, 108.43, 36.33, 34.65.

<sup>19</sup>F NMR (282 MHz, CDCl<sub>3</sub>) δ -113.31.

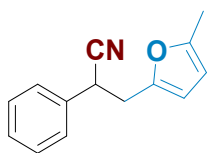

**3-(5-methylfuran-2-yl)-2-phenylpropanenitrile:**  $^1\text{H NMR}$  (300 MHz,  $\text{CDCl}_3$ )  $\delta$  7.38 – 7.22 (m, 5H), 5.94 (dq,  $J = 3.2, 0.6$  Hz, 1H), 5.82 (dq,  $J = 3.2, 1.0$  Hz, 1H), 4.08 (dd,  $J = 8.7, 6.4$  Hz, 1H), 3.20 – 2.99 (m, 2H), 2.23 – 2.20 (m, 3H).

$^{13}\text{C NMR}$  (75 MHz,  $\text{CDCl}_3$ )  $\delta$  151.78, 148.14, 135.10, 129.08, 128.29, 127.32, 120.24, 108.92, 106.35, 37.31, 34.85, 13.54.

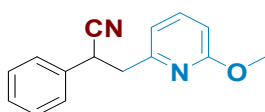

**3-(6-methoxypyridin-2-yl)-2-phenylpropanenitrile:**  $^1\text{H NMR}$  (300 MHz,  $\text{CDCl}_3$ )  $\delta$  7.38 (dd,  $J = 8.3, 7.2$  Hz, 1H), 7.29 – 7.24 (m, 5H), 6.60 – 6.51 (m, 2H), 4.42 (dd,  $J = 8.8, 6.5$  Hz, 1H), 3.87 (s, 3H), 3.26 – 3.06 (m, 2H).

$^{13}\text{C NMR}$  (75 MHz,  $\text{CDCl}_3$ )  $\delta$  163.89, 153.64, 139.13, 135.69, 129.06, 128.11, 127.45, 120.89, 116.24, 109.28, 53.47, 43.42, 36.71.

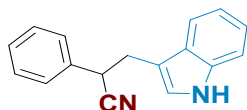

**3-(1H-indol-3-yl)-2-phenylpropanenitrile<sup>4</sup>:**  $^1\text{H NMR}$  (300 MHz,  $\text{CDCl}_3$ )  $\delta$  8.01 (s, 1H), 7.38 (ddt,  $J = 7.8, 1.4, 0.8$  Hz, 1H), 7.32 – 7.20 (m, 6H), 7.16 – 7.10 (m, 1H), 7.07 – 7.01 (m, 1H), 6.95 – 6.91 (m, 1H), 4.03 (dd,  $J = 8.5, 6.2$  Hz, 1H), 3.35 – 3.17 (m, 2H).

$^{13}\text{C NMR}$  (75 MHz,  $\text{CDCl}_3$ )  $\delta$  136.16, 135.91, 129.08, 128.18, 127.48, 126.89, 123.34, 122.30, 121.18, 119.73, 118.18, 111.48, 110.89, 39.21, 32.49.

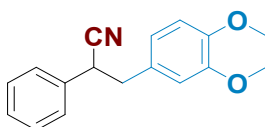

**3-(3,4-dimethoxyphenyl)-2-phenylpropanenitrile<sup>5</sup>:**  $^1\text{H NMR}$  (300 MHz,  $\text{CDCl}_3$ )  $\delta$  7.41 – 7.31 (m, 3H), 7.27 – 7.22 (m, 2H), 6.79 (d,  $J = 8.2$  Hz, 1H), 6.73 – 6.67 (m, 1H), 6.52 (d,  $J = 2.0$  Hz, 1H), 3.99 – 3.94 (m, 1H), 3.86 (s, 3H), 3.76 (s, 3H), 3.21 – 3.04 (m, 2H).

$^{13}\text{C}$  NMR (75 MHz,  $\text{CDCl}_3$ )  $\delta$  148.74, 148.31, 135.21, 129.00, 128.64, 128.16, 127.61, 121.45, 120.50, 112.45, 111.16, 55.87, 55.78, 41.82, 39.95.

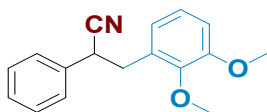

**3-(2,3-dimethoxyphenyl)-2-phenylpropanenitrile:**  $^1\text{H}$  NMR (300 MHz,  $\text{CDCl}_3$ )  $\delta$  7.36 – 7.28 (m, 5H), 6.98 (dd,  $J = 8.3, 7.5$  Hz, 1H), 6.88 – 6.85 (m, 1H), 6.74 (s, 1H), 4.17 – 4.10 (m, 1H), 3.88 (m, 3H), 3.86 (m, 3H), 3.18 – 3.13 (m, 2H).

$^{13}\text{C}$  NMR (75 MHz,  $\text{CDCl}_3$ )  $\delta$  152.65, 147.29, 135.94, 130.34, 129.02, 128.09, 127.38, 123.97, 122.74, 120.77, 112.01, 77.47, 77.05, 76.63, 60.69, 55.75, 38.47, 37.49.

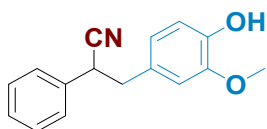

**3-(4-hydroxy-3-methoxyphenyl)-2-phenylpropanenitrile:**  $^1\text{H}$  NMR (300 MHz,  $\text{CDCl}_3$ )  $\delta$  7.41 – 7.23 (m, 5H), 6.81 – 6.70 (m, 2H), 6.68 – 6.63 (m, 1H), 5.66 (s, 1H), 3.96 (dd,  $J = 8.3, 6.6$  Hz, 1H), 3.86 (s, 3H), 3.16 – 2.99 (m, 2H).

$^{13}\text{C}$  NMR (75 MHz,  $\text{CDCl}_3$ )  $\delta$  145.93, 145.63, 135.36, 129.55, 129.04, 128.19, 127.49, 120.90, 120.52, 115.25, 110.70, 55.96, 41.71, 39.99.

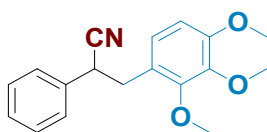

**2-phenyl-3-(2,3,4-trimethoxyphenyl)propanenitrile:**  $^1\text{H}$  NMR (300 MHz,  $\text{CDCl}_3$ )  $\delta$  7.41 – 7.22 (m, 5H), 6.82 (d,  $J = 8.4$  Hz, 1H), 6.59 (d,  $J = 8.5$  Hz, 1H), 4.08 (dd,  $J = 9.0, 6.4$  Hz, 1H), 3.90 (s, 3H), 3.85 (d,  $J = 6.8$  Hz, 6H), 3.15 – 2.99 (m, 2H).

$^{13}\text{C}$  NMR (75 MHz,  $\text{CDCl}_3$ )  $\delta$  153.43, 151.90, 142.03, 135.94, 129.00, 128.04, 127.37, 125.07, 122.34, 120.84, 106.97, 60.92, 60.76, 55.96, 38.80, 37.33.

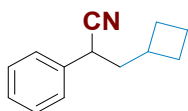

**3-cyclobutyl-2-phenylpropanenitrile:**  $^1\text{H NMR}$  (300 MHz,  $\text{CDCl}_3$ )  $\delta$  7.40 – 7.28 (m, 5H), 3.67 (dd,  $J = 8.6, 6.5$  Hz, 1H), 2.52 – 2.36 (m, 1H), 2.18 – 1.71 (m, 6H), 1.70 – 1.54 (m, 2H).

$^{13}\text{C NMR}$  (75 MHz,  $\text{CDCl}_3$ )  $\delta$  136.03, 129.04, 127.25, 125.64, 121.00, 42.84, 35.49, 33.59, 28.01, 18.44.

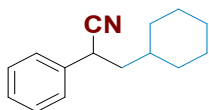

**3-Cyclohexyl-2-phenylpropanenitrile<sup>1</sup>:**  $^1\text{H NMR}$  (300 MHz,  $\text{CDCl}_3$ )  $\delta$  7.57 – 7.22 (m, 5H), 3.89 – 3.82 (m, 1H), 1.97 – 1.78 (m, 2H), 1.78 – 1.07 (m, 11H).

$^{13}\text{C NMR}$  (75 MHz,  $\text{CDCl}_3$ )  $\delta$  136.52, 129.10, 127.96, 127.22, 121.15, 43.71, 35.31, 34.82, 33.29, 32.36, 26.34, 25.96, 25.87.

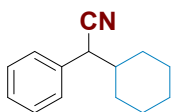

**2-cyclohexyl-2-phenylacetonitrile:**  $^1\text{H NMR}$  (300 MHz,  $\text{CDCl}_3$ )  $\delta$  7.30 – 7.15 (m, 5H), 3.52 (d,  $J = 6.6$  Hz, 1H), 1.79 – 1.53 (m, 6H), 1.06 (tq,  $J = 12.3, 3.4$  Hz, 5H).

$^{13}\text{C NMR}$  (75 MHz,  $\text{CDCl}_3$ )  $\delta$  134.70, 128.80, 127.99, 127.91, 120.15, 44.36, 42.78, 31.24, 29.58, 25.95, 25.85, 25.80.

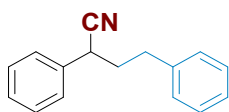

**2,4-Diphenylbutanenitrile<sup>1</sup>:**  $^1\text{H NMR}$  (300 MHz,  $\text{CDCl}_3$ )  $\delta$  7.25 – 7.06 (m, 10H), 6.60 – 6.11 (m, 1H), 3.45 (d,  $J = 6.3$  Hz, 1H), 2.58 – 2.52 (m, 2H), 1.92 – 1.82 (m, 1H).

$^{13}\text{C NMR}$  (75 MHz,  $\text{CDCl}_3$ )  $\delta$  142.32, 131.10, 129.26, 128.71, 128.48, 128.34, 127.14, 126.16, 125.77, 39.38, 35.47, 32.99.

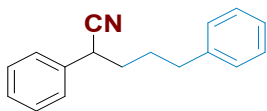

**2,5-Diphenylpentanenitrile<sup>3</sup>:** <sup>1</sup>H NMR (300 MHz, CDCl<sub>3</sub>) δ 7.60 – 7.19 (m, 10H), 3.90 – 3.72 (m, 1H), 2.72 (q, *J* = 8.2 Hz, 2H), 1.96 (dp, *J* = 21.1, 8.6 Hz, 4H).

<sup>13</sup>C NMR (75 MHz, CDCl<sub>3</sub>) δ 141.25, 135.87, 129.17, 128.56, 128.46, 128.15, 127.33, 126.17, 120.87, 37.32, 35.29, 35.18, 28.64.

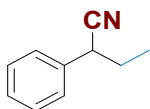

**2-Phenylbutanenitrile<sup>1</sup>:** <sup>1</sup>H NMR (400 MHz, CDCl<sub>3</sub>) δ 7.44 – 7.32 (m, 5H), 3.77 (t, *J* = 7.2 Hz, 1H), 2.03 – 1.94 (m, 2H), 1.10 (t, *J* = 7.4 Hz, 3H).

<sup>13</sup>C NMR (101 MHz, CDCl<sub>3</sub>) δ 135.78, 129.04, 128.03, 127.32, 120.79, 38.92, 29.24, 11.50.

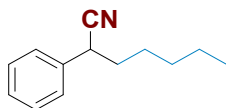

**2-Phenylheptanenitrile<sup>3</sup>:** <sup>1</sup>H NMR (300 MHz, CDCl<sub>3</sub>) δ 7.29 – 7.15 (m, 5H), 3.65 (dd, *J* = 8.4, 6.4 Hz, 1H), 1.83 – 1.64 (m, 2H), 1.43 – 1.28 (m, 2H), 1.22 – 1.15 (m, 4H), 0.79 – 0.74 (m, 3H).

<sup>13</sup>C NMR (75 MHz, CDCl<sub>3</sub>) δ 136.13, 129.05, 127.99, 127.25, 120.97, 37.42, 35.91, 31.12, 26.73, 22.37, 13.96.

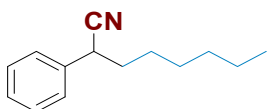

**2-Phenyldecanenitrile<sup>3</sup>:** <sup>1</sup>H NMR (300 MHz, CDCl<sub>3</sub>) δ 7.36 – 7.21 (m, 5H), 3.72 (dd, *J* = 8.4, 6.4 Hz, 1H), 1.91 – 1.75 (m, 2H), 1.50 – 1.36 (m, 2H), 1.28 – 1.20 (m, 6H), 0.85 – 0.80 (m, 3H).

<sup>13</sup>C NMR (75 MHz, CDCl<sub>3</sub>) δ 136.13, 129.05, 127.98, 127.25, 120.97, 37.43, 35.95, 31.50, 28.64, 27.02, 22.54, 14.03.

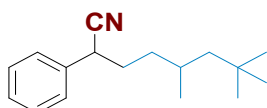

**5,7,7-trimethyl-2-phenyloctanenitrile:** <sup>1</sup>H NMR (300 MHz, CDCl<sub>3</sub>) δ 7.99 – 7.92 (m, 1H), 3.00 – 2.92 (m, 1H), 1.64 – 1.51 (m, 2H), 1.33 – 1.28 (m, 1H), 1.25 (d, *J* = 1.4 Hz, 1H), 0.98 (d, *J* = 6.4 Hz, 2H), 0.93 – 0.92 (m, 2H), 0.90 (s, 9H), 0.87 (d, *J* = 1.7 Hz, 3H).

$^{13}\text{C}$  NMR (75 MHz,  $\text{CDCl}_3$ )  $\delta$  200.78, 132.85, 129.05, 128.56, 128.05, 127.23, 77.47, 77.04, 76.62, 51.04, 36.52, 33.69, 31.09, 30.07, 30.00, 29.04, 22.53.

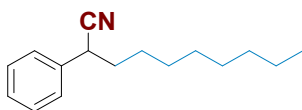

**2-phenyldecanenitrile**<sup>3</sup>:  $^1\text{H}$  NMR (300 MHz,  $\text{CDCl}_3$ )  $\delta$  7.49 – 7.21 (m, 5H), 3.80 – 3.73 (m, 1H), 2.14 – 1.67 (m, 2H), 1.31 – 1.24 (m, 12H), 0.88 (td,  $J = 3.6, 2.2$  Hz, 3H).

$^{13}\text{C}$  NMR (75 MHz,  $\text{CDCl}_3$ )  $\delta$  136.11, 129.04, 127.97, 127.24, 120.96, 37.41, 35.93, 31.80, 29.27, 29.17, 28.97, 27.05, 22.63, 14.09.

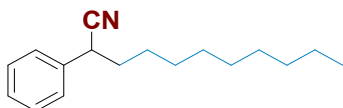

**2-phenylundecanenitrile**<sup>1</sup>:  $^1\text{H}$  NMR (300 MHz,  $\text{CDCl}_3$ )  $\delta$  7.25 – 7.13 (m, 5H), 3.70 – 3.59 (m, 1H), 1.86 – 1.64 (m, 2H), 1.16 – 1.09 (m, 14H), 0.75 (q,  $J = 2.5$  Hz, 3H).

$^{13}\text{C}$  NMR (75 MHz,  $\text{CDCl}_3$ )  $\delta$  136.13, 129.04, 127.97, 127.24, 120.95, 37.42, 35.95, 31.86, 29.47, 29.32, 29.26, 28.97, 27.06, 22.68, 14.12.

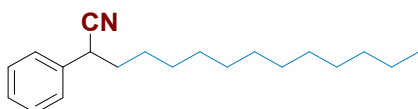

**2-Phenyltetradecanenitrile**<sup>3</sup>:  $^1\text{H}$  NMR (300 MHz,  $\text{CDCl}_3$ )  $\delta$  7.34 – 7.16 (m, 5H), 3.68 (dd,  $J = 8.4, 6.4$  Hz, 1H), 1.87 – 1.71 (m, 2H), 1.19 – 1.16 (m, 20H), 0.80 (s, 3H).

$^{13}\text{C}$  NMR (75 MHz,  $\text{CDCl}_3$ )  $\delta$  136.14, 129.03, 127.96, 127.24, 120.92, 37.42, 35.96, 31.94, 29.65, 29.61, 29.52, 29.38, 29.32, 28.98, 27.07, 22.72, 14.14.

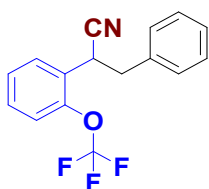

**3-phenyl-2-(2-(trifluoromethoxy)phenyl)propanenitrile**:  $^1\text{H}$  NMR (300 MHz,  $\text{CDCl}_3$ )  $\delta$  7.49 (dd,  $J = 7.9, 1.9$  Hz, 1H), 7.41 – 7.37 (m, 1H), 7.31 (dddd,  $J = 6.8, 4.8, 2.6, 1.4$  Hz, 5H), 7.22 – 7.18 (m, 2H), 4.39 (dd,  $J = 8.8, 5.5$  Hz, 1H), 3.20 – 3.08 (m, 2H).

$^{13}\text{C}$  NMR (75 MHz,  $\text{CDCl}_3$ )  $\delta$  146.31, 135.95, 129.93, 129.53, 129.18, 128.76, 128.52, 128.33, 127.60, 127.52, 127.21, 120.00, 119.59, 40.60, 34.30.

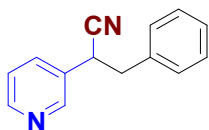

**3-phenyl-2-(pyridin-3-yl)propanenitrile<sup>4</sup>:**  $^1\text{H}$  NMR (300 MHz,  $\text{CDCl}_3$ )  $\delta$  8.57 – 8.30 (m, 2H), 7.50 (dt,  $J$  = 7.9, 1.8 Hz, 1H), 7.27 – 7.15 (m, 4H), 7.07 – 6.98 (m, 2H), 4.05 – 3.95 (m, 1H), 3.11 (qd,  $J$  = 13.6, 7.3 Hz, 2H).

$^{13}\text{C}$  NMR (75 MHz,  $\text{CDCl}_3$ )  $\delta$  149.67, 148.85, 135.34, 135.09, 131.04, 129.26, 128.82, 127.73, 123.74, 119.45, 41.78, 37.24.

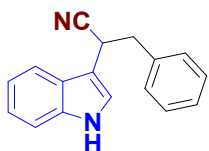

**2-(1H-indol-3-yl)-3-phenylpropanenitrile<sup>4</sup>:**  $^1\text{H}$  NMR (300 MHz,  $\text{CDCl}_3$ )  $\delta$  8.37 (s, 1H), 7.72 (ddt,  $J$  = 7.6, 1.5, 0.8 Hz, 1H), 7.42 (s, 2H), 7.37 – 7.32 (m, 3H), 7.26 (ddt,  $J$  = 7.0, 3.7, 1.7 Hz, 3H), 7.09 (dd,  $J$  = 2.6, 0.8 Hz, 1H), 4.75 (s, 1H), 4.35 (ddd,  $J$  = 8.4, 6.0, 0.8 Hz, 1H), 3.42 – 3.29 (m, 2H).

$^{13}\text{C}$  NMR (75 MHz,  $\text{CDCl}_3$ )  $\delta$  137.02, 136.49, 129.27, 128.65, 127.73, 127.34, 127.09, 125.20, 122.79, 120.23, 118.34, 111.84, 109.90, 65.34, 40.22, 31.53.

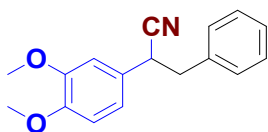

**2-(3,4-dimethoxyphenyl)-3-phenylpropanenitrile<sup>6</sup>:**  $^1\text{H}$  NMR (300 MHz,  $\text{CDCl}_3$ )  $\delta$  7.37 – 7.28 (m, 3H), 7.16 – 7.08 (m, 2H), 6.84 – 6.79 (m, 2H), 6.64 (d,  $J$  = 1.7 Hz, 1H), 3.98 – 3.93 (m, 1H), 3.88 (s, 3H), 3.81 (s, 3H), 3.16 (qd,  $J$  = 13.5, 7.3 Hz, 2H).

$^{13}\text{C}$  NMR (75 MHz,  $\text{CDCl}_3$ )  $\delta$  149.13, 148.87, 136.33, 129.34, 128.61, 127.48, 127.35, 120.63, 119.80, 111.31, 110.61, 55.96, 55.92, 42.24, 39.27.

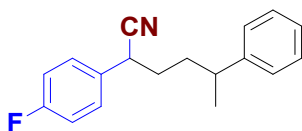

**2-(4-fluorophenyl)-5-phenylhexanenitrile:**  $^1\text{H NMR}$  (400 MHz,  $\text{CDCl}_3$ )  $\delta$  7.37 – 7.30 (m, 2H), 7.28 – 7.21 (m, 3H), 7.20 – 7.15 (m, 2H), 7.10 – 7.03 (m, 2H), 3.79 – 3.63 (m, 1H), 2.84 – 2.65 (m, 1H), 1.95 – 1.67 (m, 4H), 1.29 (d,  $J = 7.0$  Hz, 3H).

$^{13}\text{C NMR}$  (101 MHz,  $\text{CDCl}_3$ )  $\delta$  198.71, 166.90, 164.37, 146.45, 133.40, 133.37, 130.67, 130.58, 128.55, 127.09, 126.27, 115.68, 115.47, 39.53, 36.61, 32.46, 29.73, 22.62.

$^{19}\text{F NMR}$  (282 MHz,  $\text{CDCl}_3$ )  $\delta$  -113.88.

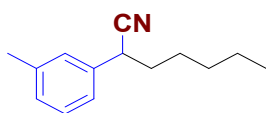

**2-(m-tolyl)heptanenitrile:**  $^1\text{H NMR}$  (300 MHz,  $\text{CDCl}_3$ )  $\delta$  7.29 – 7.23 (m, 1H), 7.16 – 7.08 (m, 3H), 3.73 (dd,  $J = 8.5, 6.3$  Hz, 1H), 2.37 (t,  $J = 0.7$  Hz, 3H), 1.99 – 1.76 (m, 2H), 1.56 – 1.42 (m, 2H), 1.36 – 1.28 (m, 4H), 0.91 – 0.85 (m, 3H).

$^{13}\text{C NMR}$  (75 MHz,  $\text{CDCl}_3$ )  $\delta$  138.87, 136.03, 128.90, 128.71, 127.90, 124.30, 121.10, 37.36, 35.92, 31.13, 26.78, 22.37, 21.39, 13.96.

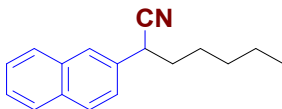

**2-(naphthalen-2-yl)heptanenitrile:**  $^1\text{H NMR}$  (300 MHz,  $\text{CDCl}_3$ )  $\delta$  7.84 – 7.80 (m, 2H), 7.77 – 7.73 (m, 1H), 7.60 (dd,  $J = 7.1, 1.3$  Hz, 1H), 7.51 – 7.40 (m, 3H), 4.45 (t,  $J = 7.2$  Hz, 1H), 1.95 (td,  $J = 8.0, 7.0$  Hz, 2H), 1.59 – 0.94 (m, 6H), 0.82 (q,  $J = 2.7$  Hz, 3H).

$^{13}\text{C NMR}$  (75 MHz,  $\text{CDCl}_3$ )  $\delta$  136.72, 134.05, 131.77, 129.98, 129.35, 128.87, 126.87, 126.08, 125.49, 122.09, 121.21, 34.81, 34.47, 31.16, 27.21, 22.44, 13.97.

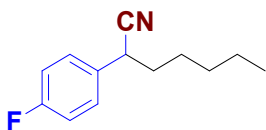

**2-(4-fluorophenyl)heptanenitrile:**  $^1\text{H NMR}$  (300 MHz,  $\text{CDCl}_3$ )  $\delta$  7.34 – 7.25 (m, 2H), 7.11 – 7.02 (m, 2H), 3.75 (dd,  $J = 8.5, 6.4$  Hz, 1H), 1.97 – 1.76 (m, 2H), 1.53 – 1.39 (m, 2H), 1.35 – 1.27 (m,



4H), 0.91 – 0.86 (m, 3H).

$^{13}\text{C}$  NMR (75 MHz,  $\text{CDCl}_3$ )  $\delta$  163.97, 160.70, 131.89, 131.85, 128.98, 128.87, 120.77, 116.16, 115.87, 36.70, 35.90, 31.06, 26.63, 22.34, 13.92.

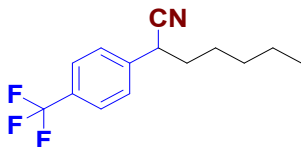

**2-(4-(trifluoromethyl)phenyl)heptanenitrile:**  $^1\text{H}$  NMR (300 MHz,  $\text{CDCl}_3$ )  $\delta$  7.61 – 7.53 (m, 2H), 7.43 – 7.34 (m, 2H), 3.78 (dd,  $J$  = 8.4, 6.3 Hz, 1H), 1.89 – 1.72 (m, 2H), 1.46 – 1.35 (m, 2H), 1.24 (tq,  $J$  = 4.0, 2.9 Hz, 4H), 0.84 – 0.79 (m, 3H).

$^{13}\text{C}$  NMR (75 MHz,  $\text{CDCl}_3$ )  $\delta$  140.03, 128.37, 127.71, 126.16, 126.11, 126.06, 126.01, 125.67, 125.62, 122.03, 120.12, 37.28, 35.73, 31.03, 26.65, 22.31, 13.89.

$^{19}\text{F}$  NMR (282 MHz,  $\text{CDCl}_3$ )  $\delta$  -62.71, -63.10.

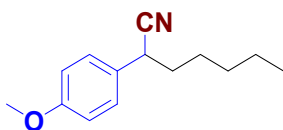

**2-(4-methoxyphenyl)heptanenitrile:**  $^1\text{H}$  NMR (300 MHz,  $\text{CDCl}_3$ )  $\delta$  7.25 – 7.12 (m, 2H), 6.93 – 6.83 (m, 2H), 3.78 (s, 3H), 3.70 (dd,  $J$  = 8.4, 6.4 Hz, 1H), 1.96 – 1.70 (m, 2H), 1.36 – 1.23 (m, 6H), 0.89 – 0.84 (m, 3H).

$^{13}\text{C}$  NMR (75 MHz,  $\text{CDCl}_3$ )  $\delta$  159.26, 128.33, 128.07, 121.24, 114.38, 55.30, 36.55, 35.89, 31.10, 26.65, 22.36, 13.92.

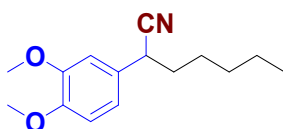

**2-(3,4-dimethoxyphenyl)heptanenitrile:**  $^1\text{H}$  NMR (300 MHz,  $\text{CDCl}_3$ )  $\delta$  6.83 – 6.80 (m, 2H), 6.78 (dd,  $J$  = 2.0, 0.8 Hz, 1H), 3.85 (s, 3H), 3.83 (s, 3H), 3.68 (dd,  $J$  = 8.5, 6.5 Hz, 1H), 1.93 – 1.72 (m, 2H), 1.32 – 1.22 (m, 6H), 0.84 (q,  $J$  = 4.0 Hz, 3H).

$^{13}\text{C}$  NMR (75 MHz,  $\text{CDCl}_3$ )  $\delta$  149.32, 148.74, 128.49, 121.15, 119.54, 111.41, 110.26, 55.97, 55.92, 36.93, 35.85, 31.08, 26.68, 22.34, 13.90.

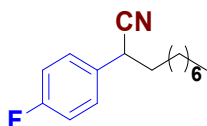

**2-(4-fluorophenyl)undecanenitrile:**  $^1\text{H NMR}$  (300 MHz,  $\text{CDCl}_3$ )  $\delta$  7.34 – 7.26 (m, 2H), 7.12 – 7.02 (m, 2H), 3.80 – 3.69 (m, 1H), 1.97 – 1.75 (m, 2H), 1.32 – 1.23 (m, 12H), 0.89 – 0.85 (m, 3H).

$^{13}\text{C NMR}$  (75 MHz,  $\text{CDCl}_3$ )  $\delta$  163.97, 160.69, 131.89, 131.85, 130.73, 128.98, 128.87, 120.77, 116.15, 115.87, 115.76, 36.70, 35.94, 31.78, 29.25, 29.14, 28.92, 26.96, 22.62, 14.08.

$^{19}\text{F NMR}$  (282 MHz,  $\text{CDCl}_3$ )  $\delta$  -114.00.

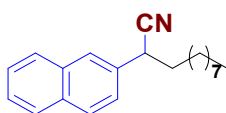

**2-(naphthalen-2-yl)dodecanenitrile:**  $^1\text{H NMR}$  (300 MHz,  $\text{CDCl}_3$ )  $\delta$  7.93 – 7.88 (m, 2H), 7.84 (dt,  $J = 8.4, 1.0$  Hz, 1H), 7.69 (dd,  $J = 7.2, 1.3$  Hz, 1H), 7.61 – 7.48 (m, 3H), 4.62 – 4.47 (m, 1H), 2.08 (d,  $J = 8.3$  Hz, 2H), 1.27 (t,  $J = 3.8$  Hz, 14H), 0.89 (d,  $J = 2.5$  Hz, 3H).

$^{13}\text{C NMR}$  (75 MHz,  $\text{CDCl}_3$ )  $\delta$  134.05, 131.78, 129.99, 129.34, 128.86, 128.84, 126.86, 126.07, 125.49, 122.10, 121.20, 34.84, 34.47, 31.86, 29.48, 29.37, 29.27, 29.02, 27.52, 22.68, 14.13.

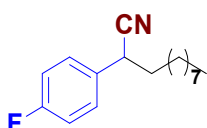

**2-(4-fluorophenyl)dodecanenitrile:**  $^1\text{H NMR}$  (300 MHz,  $\text{CDCl}_3$ )  $\delta$  7.26 – 7.19 (m, 2H), 7.02 – 6.95 (m, 2H), 3.68 (dd,  $J = 8.4, 6.4$  Hz, 1H), 1.90 – 1.71 (m, 2H), 1.19 (t,  $J = 3.8$  Hz, 14H), 0.80 (d,  $J = 2.7$  Hz, 3H).

$^{13}\text{C NMR}$  (75 MHz,  $\text{CDCl}_3$ )  $\delta$  198.95, 167.31, 163.96, 160.69, 133.54, 131.91, 131.86, 130.72, 130.60, 128.97, 128.86, 120.76, 116.18, 116.14, 115.90, 115.85, 115.74, 115.45, 36.69, 35.94, 31.83, 29.44, 29.29, 29.23, 28.92, 26.96, 22.66, 14.09.

$^{19}\text{F NMR}$  (282 MHz,  $\text{CDCl}_3$ )  $\delta$  -113.99.

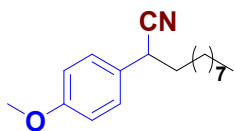

**2-(4-methoxyphenyl)dodecanenitrile<sup>7</sup>:**  $^1\text{H NMR}$  (300 MHz,  $\text{CDCl}_3$ )  $\delta$  7.25 – 7.18 (m, 2H), 6.92 – 6.85 (m, 2H), 3.79 (s, 3H), 3.70 (dd,  $J = 8.4, 6.5$  Hz, 1H), 1.94 – 1.72 (m, 2H), 1.29 – 1.24 (m, 14H), 0.88 (d,  $J = 4.3$  Hz, 3H).

$^{13}\text{C NMR}$  (75 MHz,  $\text{CDCl}_3$ )  $\delta$  159.25, 128.34, 128.08, 121.24, 114.37, 55.30, 36.57, 35.96, 31.85, 29.46, 29.32, 29.25, 28.97, 26.99, 22.67, 14.11.

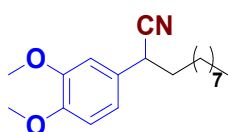

**2-(3,4-dimethoxyphenyl)dodecanenitrile:**  $^1\text{H NMR}$  (300 MHz,  $\text{CDCl}_3$ )  $\delta$  6.84 – 6.81 (m, 2H), 6.80 (dt,  $J = 2.1, 0.7$  Hz, 1H), 3.91 (d,  $J = 2.1$  Hz, 1H), 3.86 (d,  $J = 6.9$  Hz, 6H), 1.92 – 1.76 (m, 2H), 1.24 (d,  $J = 4.1$  Hz, 14H), 0.86 (d,  $J = 1.2$  Hz, 3H).

$^{13}\text{C NMR}$  (75 MHz,  $\text{CDCl}_3$ )  $\delta$  149.32, 148.72, 128.49, 121.16, 119.54, 111.36, 110.20, 55.96, 55.92, 36.97, 35.94, 31.83, 29.44, 29.31, 29.23, 28.96, 27.04, 22.65, 14.09.

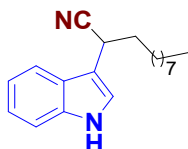

**2-(1H-indol-3-yl)octadecanenitrile:**  $^1\text{H NMR}$  (300 MHz,  $\text{CDCl}_3$ )  $\delta$  8.44 (s, 1H), 7.55 (ddt,  $J = 7.7, 1.5, 0.7$  Hz, 1H), 7.31 (t,  $J = 2.3$  Hz, 1H), 7.17 – 7.13 (m, 1H), 7.12 – 7.09 (m, 1H), 7.05 – 7.03 (m, 1H), 3.96 (ddd,  $J = 7.5, 6.8, 0.7$  Hz, 1H), 1.98 – 1.88 (m, 2H), 1.21 – 1.18 (m, 14H), 0.81 (d,  $J = 1.6$  Hz, 3H).

$^{13}\text{C NMR}$  (75 MHz,  $\text{CDCl}_3$ )  $\delta$  136.54, 125.32, 122.60, 122.38, 121.44, 119.98, 118.39, 111.76, 110.56, 33.98, 31.90, 29.54, 29.43, 29.31, 29.05, 28.93, 27.27, 22.71, 14.16.

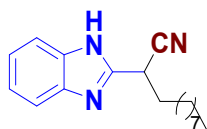

**2-(1H-benzo[d]imidazol-2-yl)octadecanenitrile:**  $^1\text{H NMR}$  (300 MHz,  $\text{CDCl}_3$ )  $\delta$  7.91 (d,  $J = 8.0$  Hz, 1H), 7.56 (d,  $J = 7.7$  Hz, 1H), 7.44 – 7.33 (m, 2H), 3.31 (dd,  $J = 7.8, 7.1$  Hz, 2H), 1.88 – 1.75 (m, 2H), 1.37 – 1.20 (m, 14H), 0.89 – 0.85 (m, 3H).

$^{13}\text{C NMR}$  (75 MHz,  $\text{CDCl}_3$ )  $\delta$  147.61, 143.42, 126.44, 123.79, 121.89, 38.35, 31.88, 29.46, 29.43, 29.29, 29.22, 24.01, 22.67, 14.11.

## S7. References

1. J. J. Li, Y. X. Liu, W. J. Tang, D. Xue, C. Q. Li, J. L. Xiao and C. Wang, *Chem. Eur. J.*, 2017, **23**, 14445-14449.
2. M. L. Buil, M. A. Esteruelas, J. Herrero, S. Izquierdo, I. M. Pastor, M. Yus, *ACS Catal.* 2013, **3**, 2072-2075.
3. S. Thiyagarajan and C. Gunanathan, *ACS Catal.*, 2017, **7**, 5483-5490.
4. W. Ma, S. Y. Cui, H. M. Sun, W. J. Tang, D. Xue, C. Q. Li, J. Fan, J. L. Xiao and C. Wang, *Chem. Eur. J.*, 2018, **24**, 13118-13123.
5. R. Grigg, T. R. Mitchell, S. Sutthivaiyakit and N. Tongpenyai, *Tetrahedron Lett.*, 1981, **22**, 4107-4110.
6. S. Bera, A. Bera and D. Banerjee, *Chem. Comm.*, 2020, **56**, 6850-6853.
7. K. Paudel, S. Xu and K. Y. Ding, *J. Org. Chem.*, 2020, **85**, 14980-14988.

## S8. NMR Spectra

200917.302.10.fid  
Zhuang Ma\_ZM 20-22  
Au1H CDCl3 {C:\Bruker\TopSpin3.6.0} 2009 2

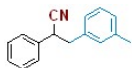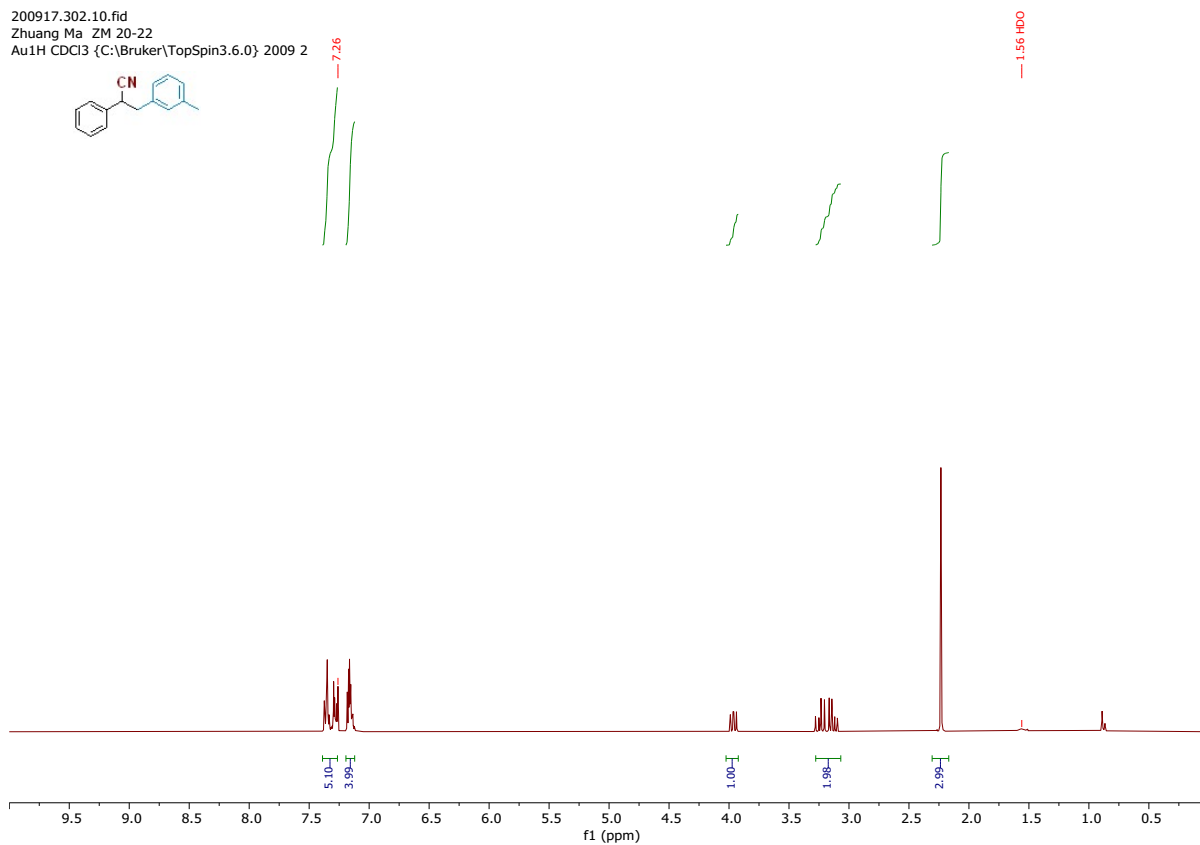

200917.302.11.fid  
Zhuang Ma\_ZM 20-22  
Au13C CDCl3 {C:\Bruker\TopSpin3.6.0} 2009 2

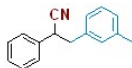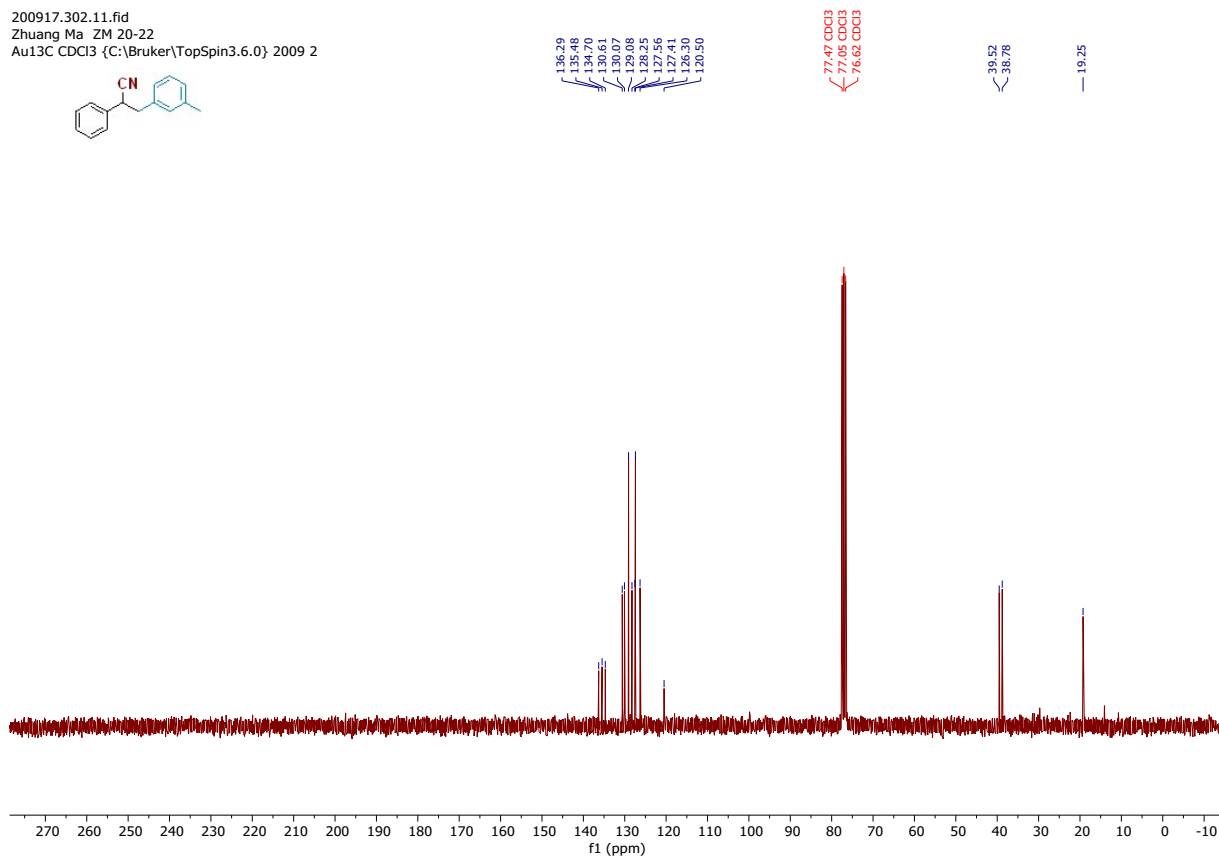

200914.328.10.fid  
Zhuang ma, Zm20-14  
Au1H CDCl3 {C:\Bruker\TopSpin3.6.0} 2009 28

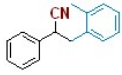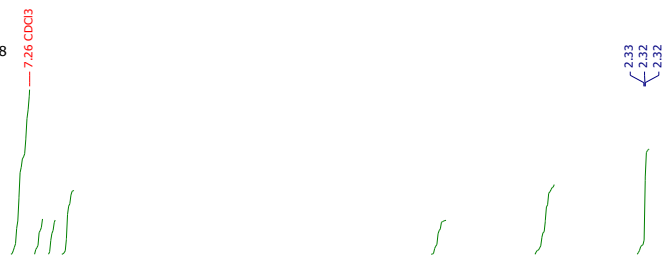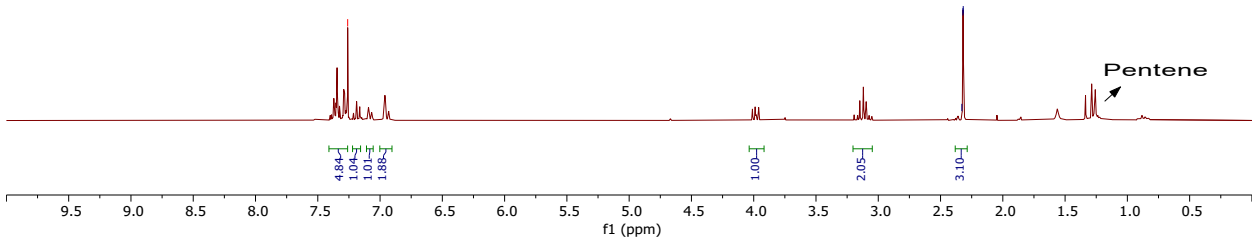

200914.328.11.fid  
Zhuang ma, Zm20-14  
Au13C CDCl3 {C:\Bruker\TopSpin3.6.0} 2009 28

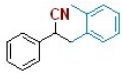

138.33  
136.27  
135.40  
129.95  
129.02  
128.52  
128.19  
127.46  
127.46  
126.20  
112.27  
77.45 CDCl3  
77.03 CDCl3  
76.61 CDCl3  
42.23  
39.90  
21.36

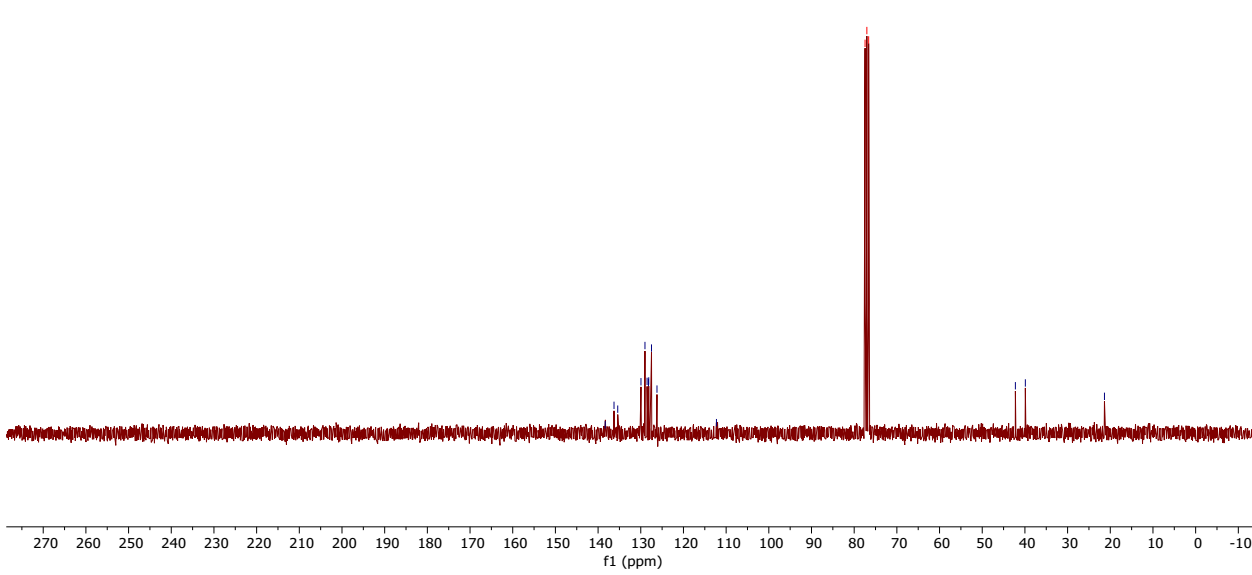

220121.314.10.fid  
Zhuang Ma ZM20-37  
Au1H CDCl3 {C:\Bruker\TopSpin3.6.2} 2201 14

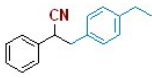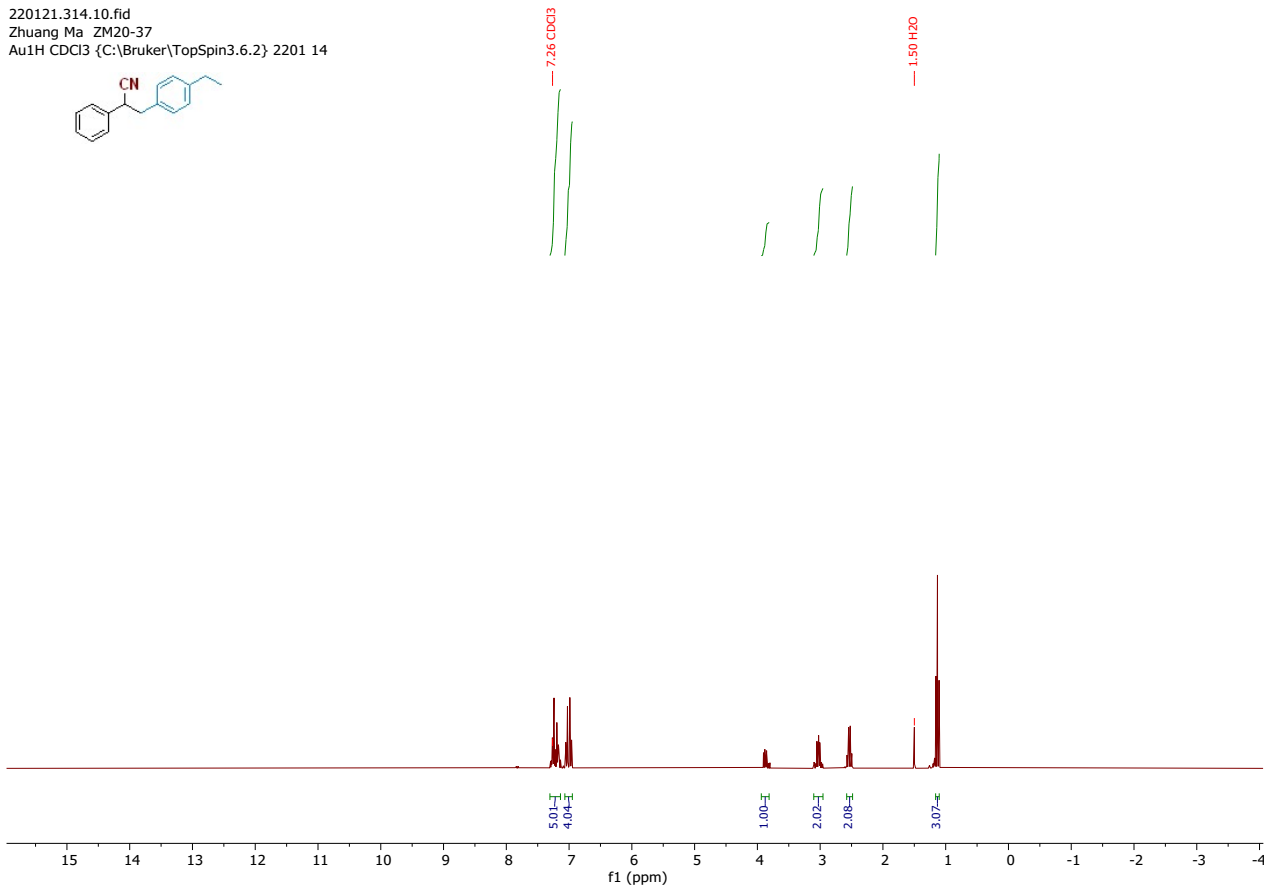

220121.314.11.fid  
Zhuang Ma ZM20-37  
Au13C CDCl3 {C:\Bruker\TopSpin3.6.2} 2201 14

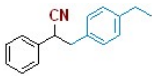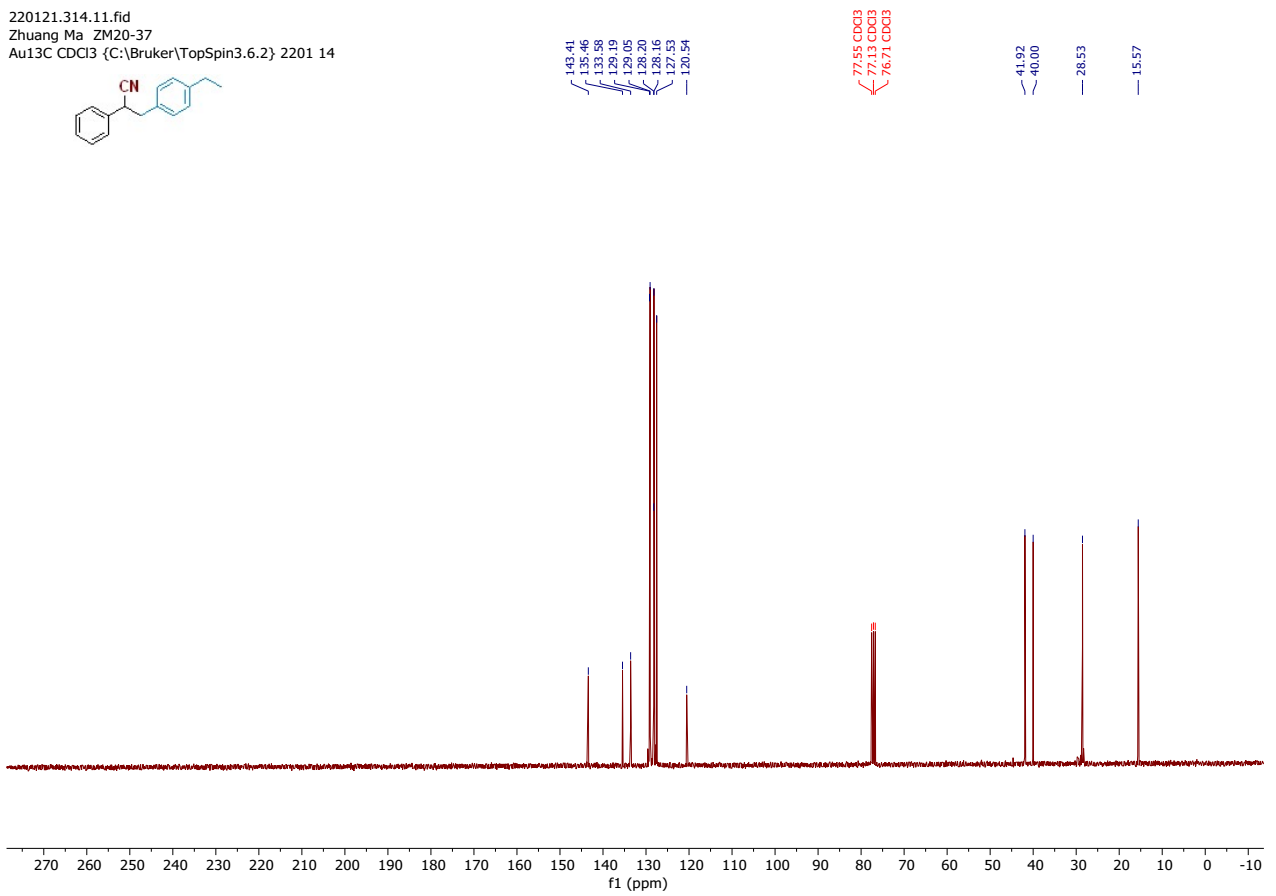

211210.f353.10.fid  
Zhuang Ma ZM 20-40  
PROTON CDCl3 {C:\Bruker\TopSpin3.6.2} 2112 53

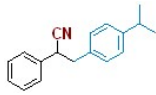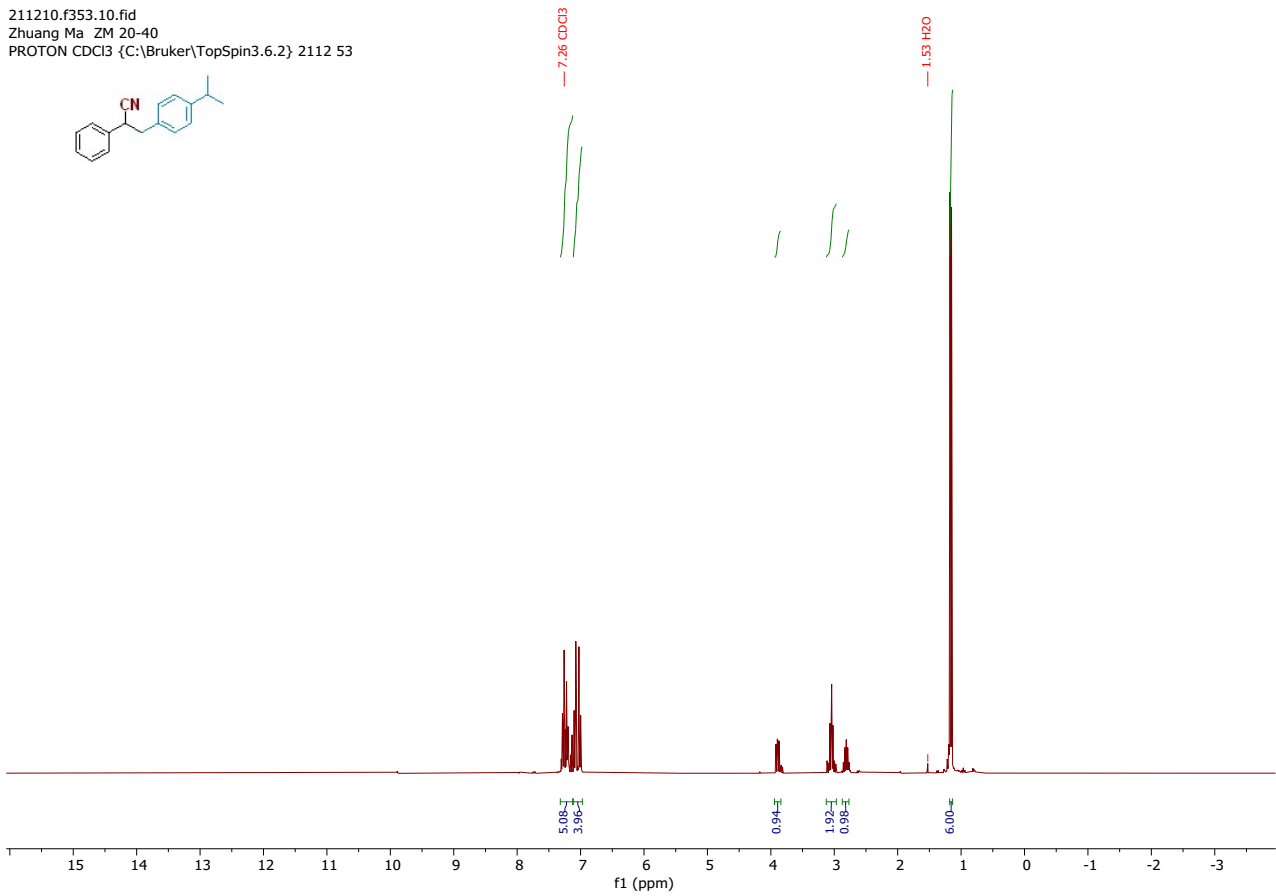

211210.f353.11.fid  
Zhuang Ma ZM 20-40  
C13CPD CDCl3 {C:\Bruker\TopSpin3.6.2} 2112 53

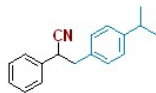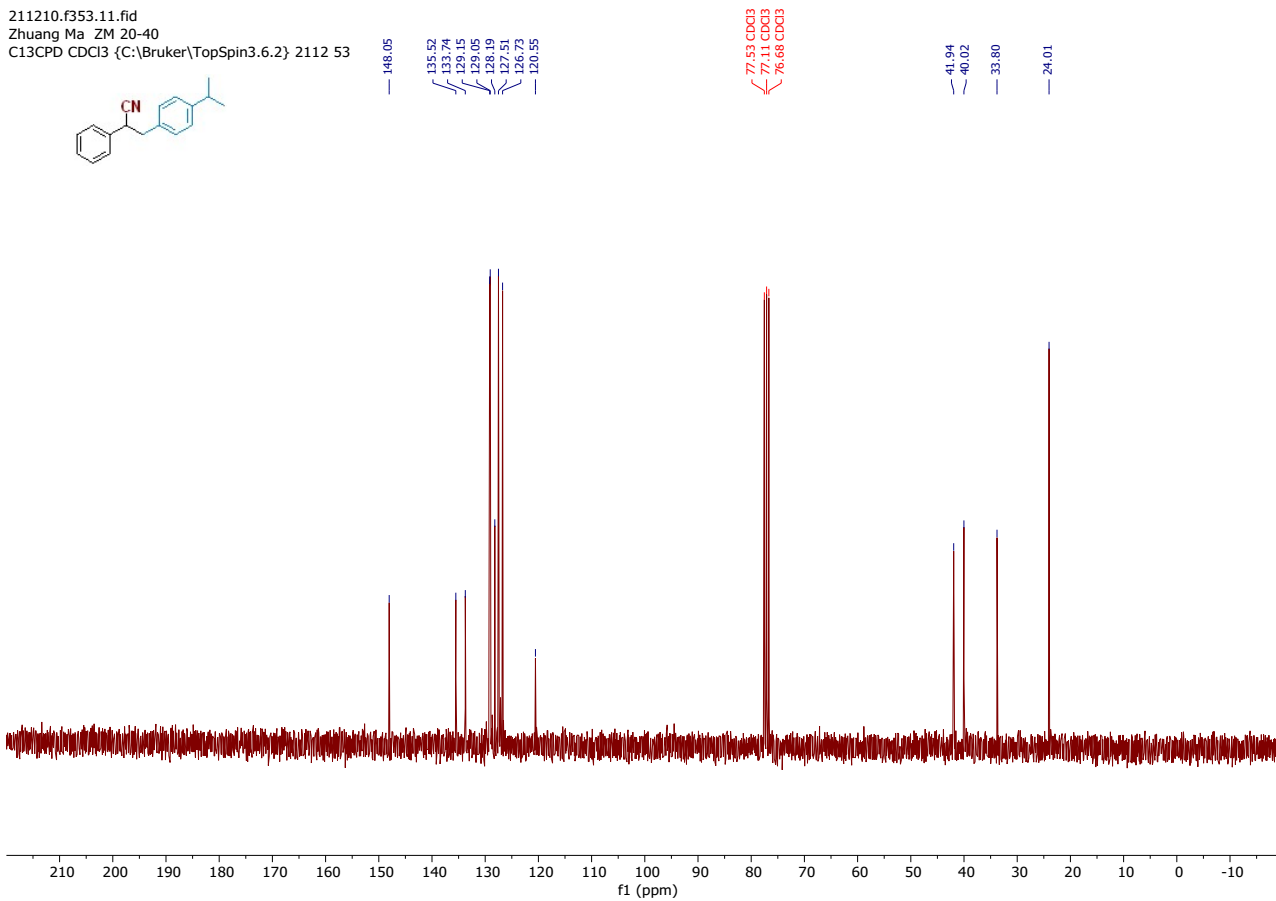



220121.313.10.fid  
Zhuang Ma\_ZM20-3  
Au1H CDCl3 {C:\Bruker\TopSpin3.6.2} 2201 13

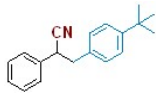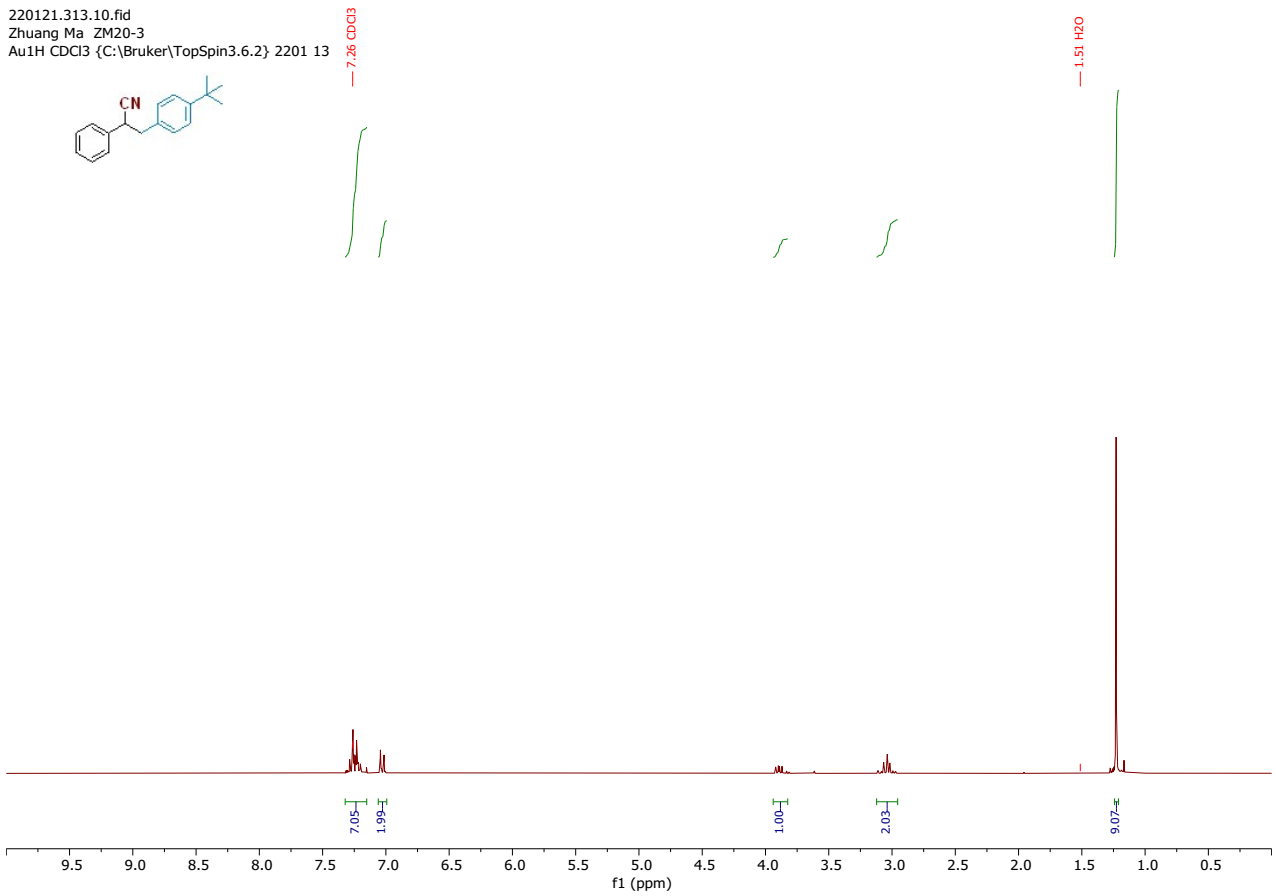

220121.313.11.fid  
Zhuang Ma\_ZM20-3  
Au13C CDCl3 {C:\Bruker\TopSpin3.6.2} 2201 13

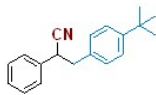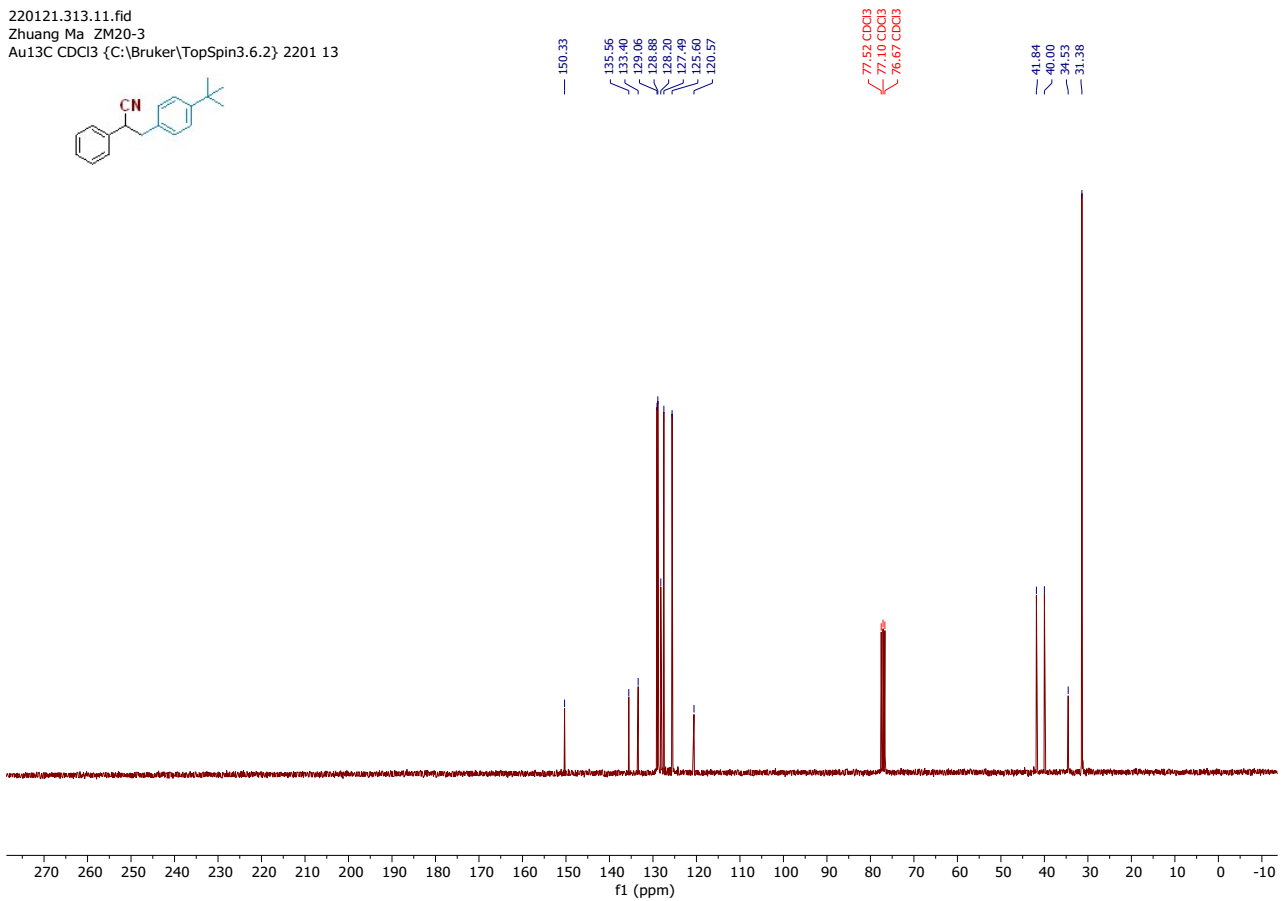

200914.327.10.fid  
Zhuang ma, Zm20-12  
Au1H CDCl3 {C:\Bruker\TopSpin3.6.0} 2009 27

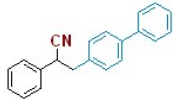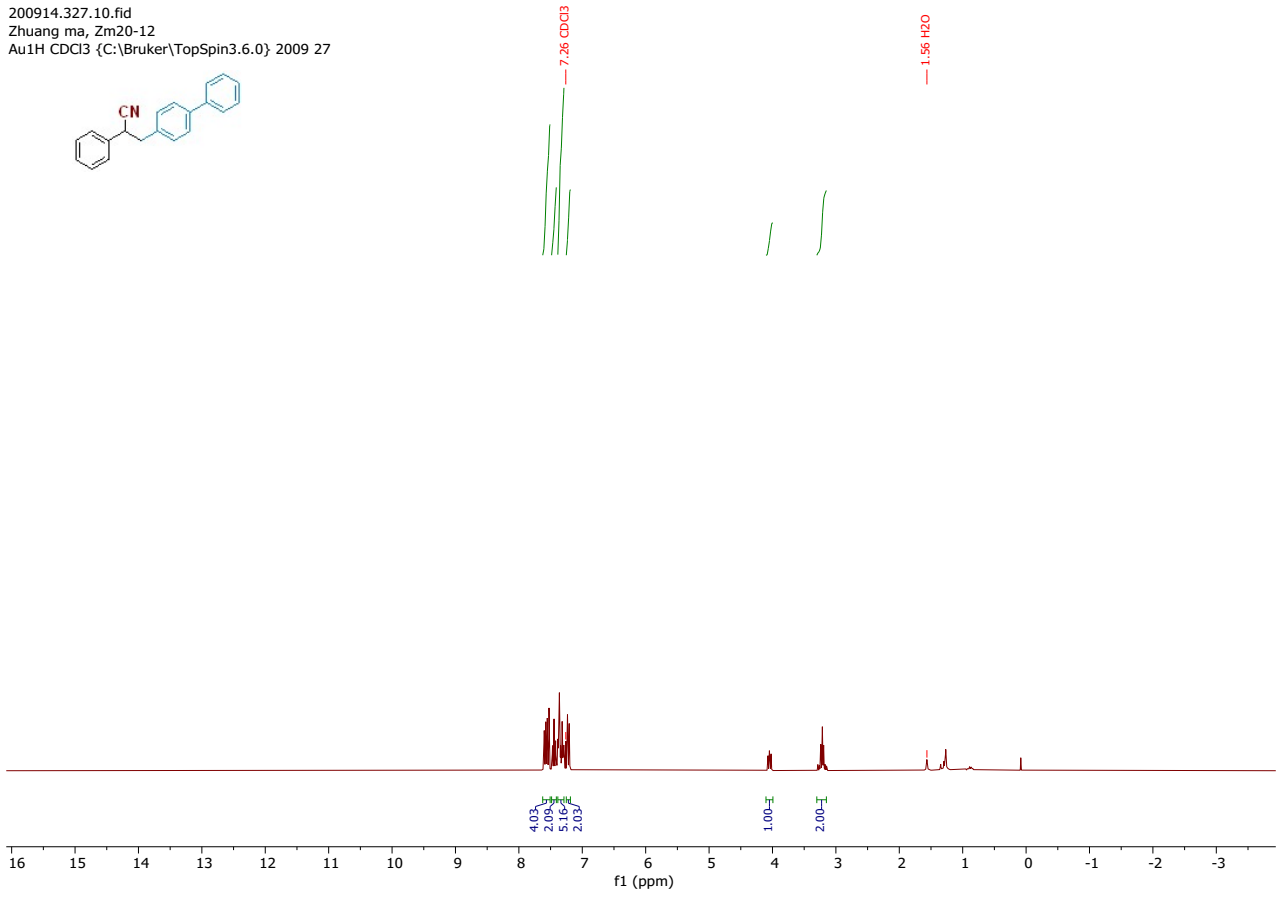

200914.327.11.fid  
Zhuang ma, Zm20-12  
Au13C CDCl3 {C:\Bruker\TopSpin3.6.0} 2009 27

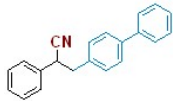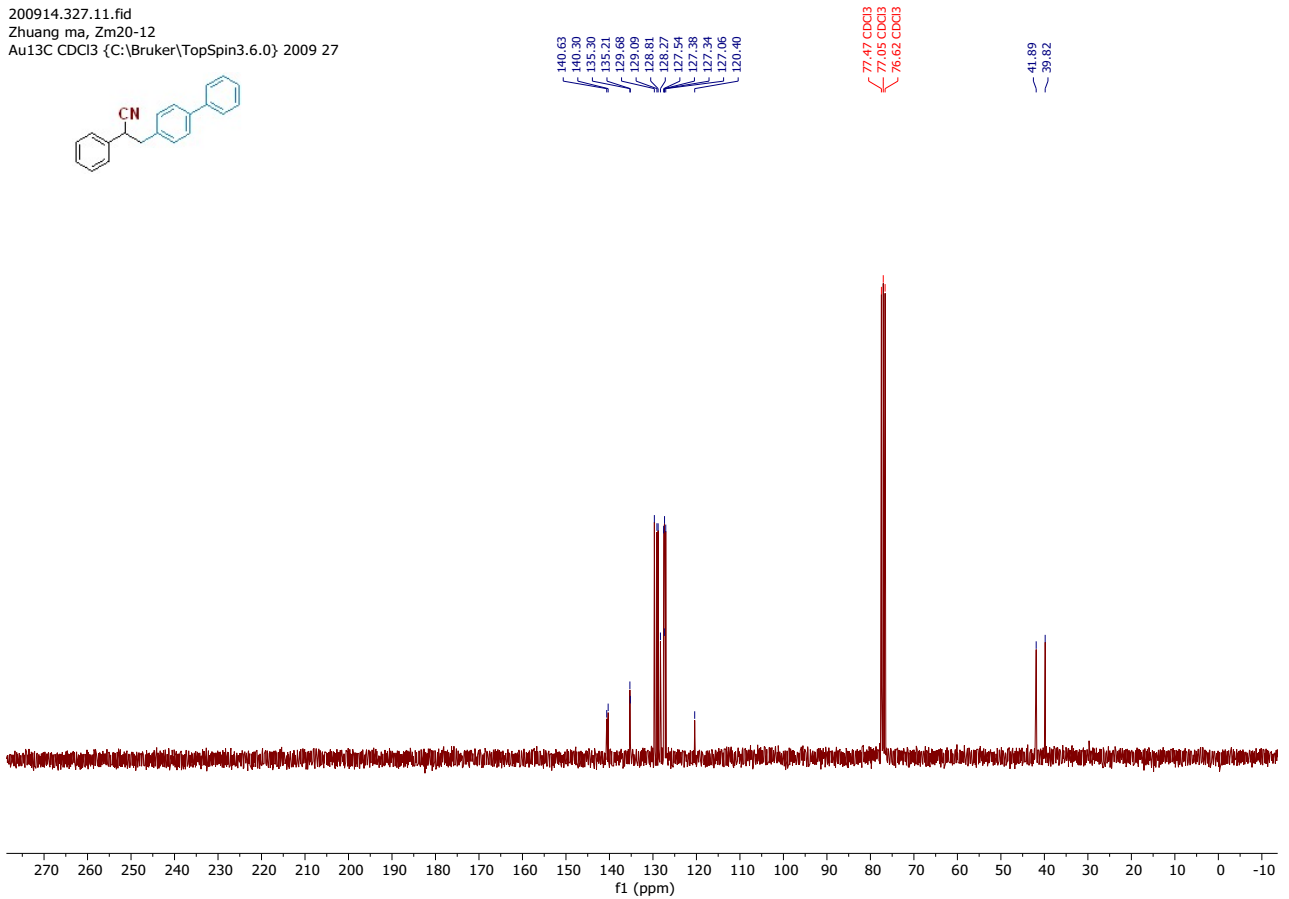

200928.f342.10.fid  
Zhuang Ma\_ZM20-2-2  
PROTON CDCl3 {C:\Bruker\TopSpin3.6.0} 2009.42

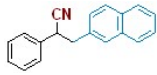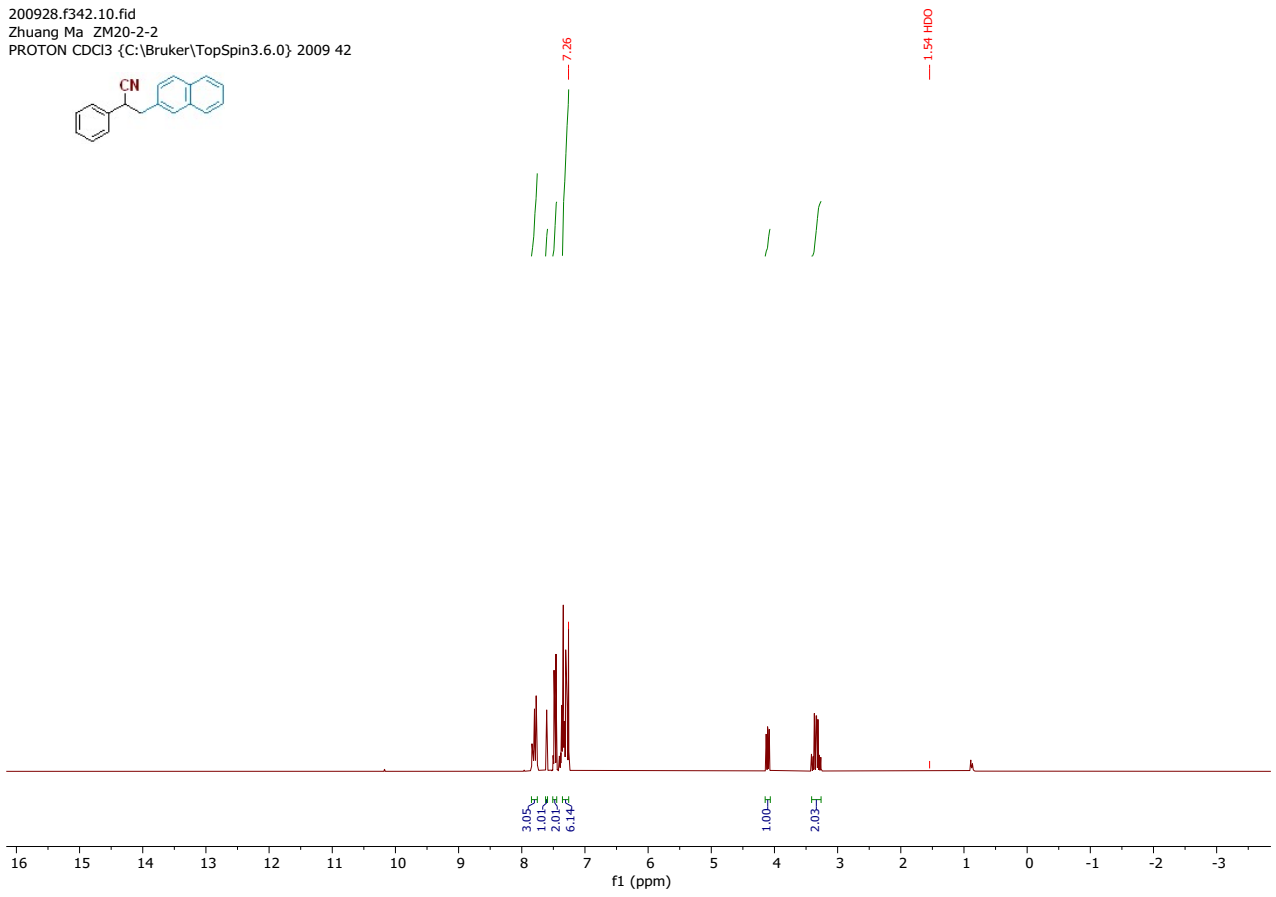

200928.f342.11.fid  
Zhuang Ma\_ZM20-2-2  
C13CPD CDCl3 {C:\Bruker\TopSpin3.6.0} 2009.42

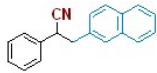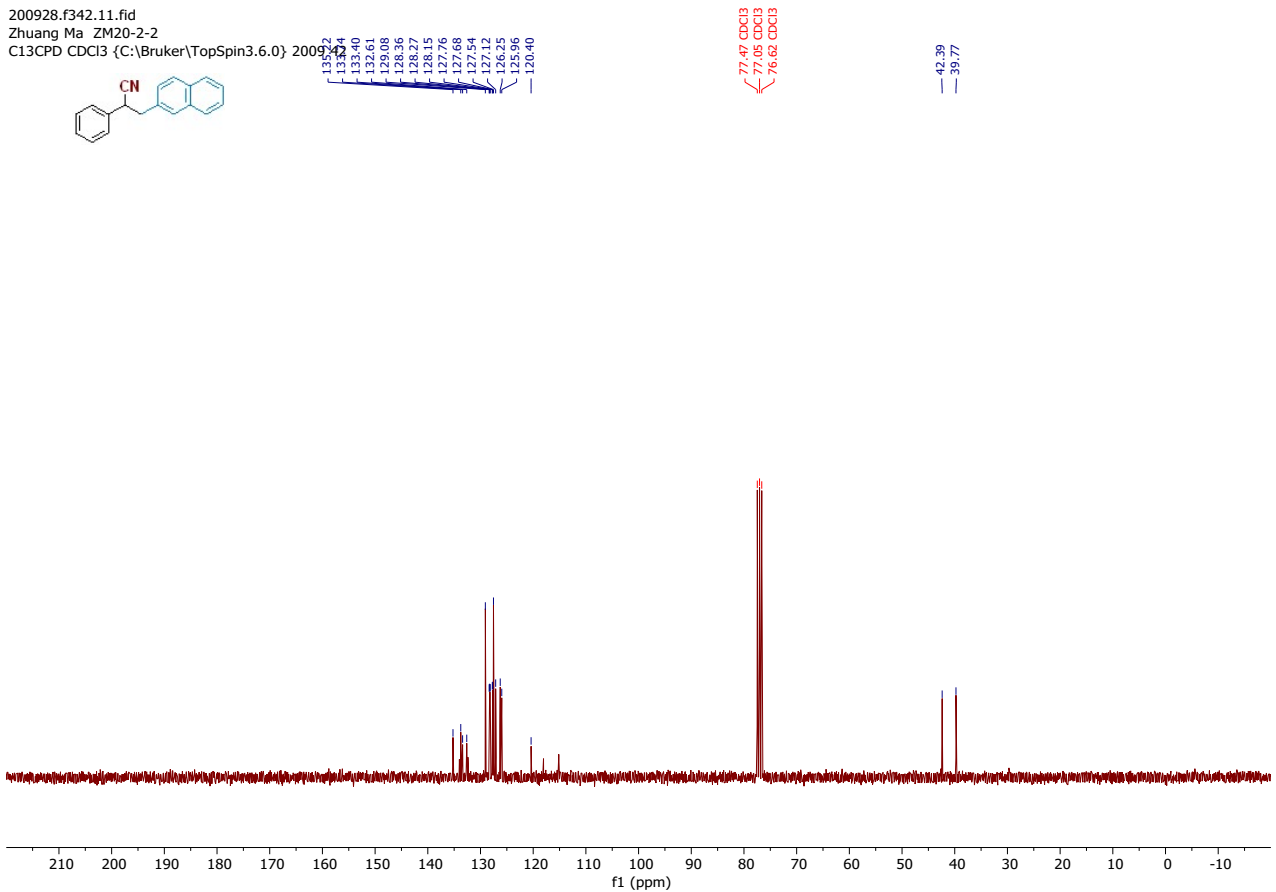

211210.f357.10.fid  
Zhuang Ma\_ZM 20-41  
PROTON CDCl3 {C:\Bruker\TopSpin3.6.2} 2112 57

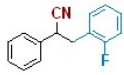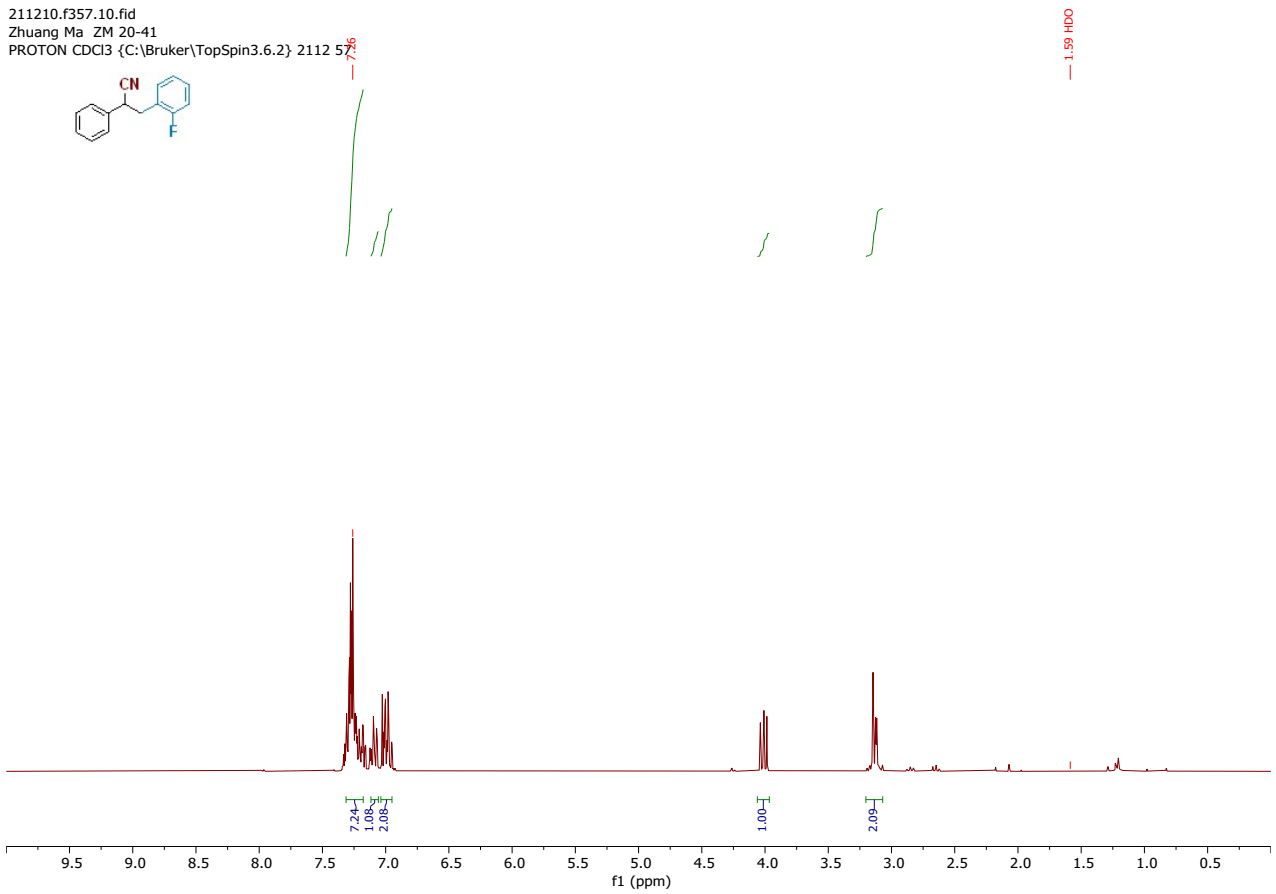

211210.f357.11.fid  
Zhuang Ma\_ZM 20-41  
C13CPD CDCl3 {C:\Bruker\TopSpin3.6.2} 2112 57

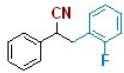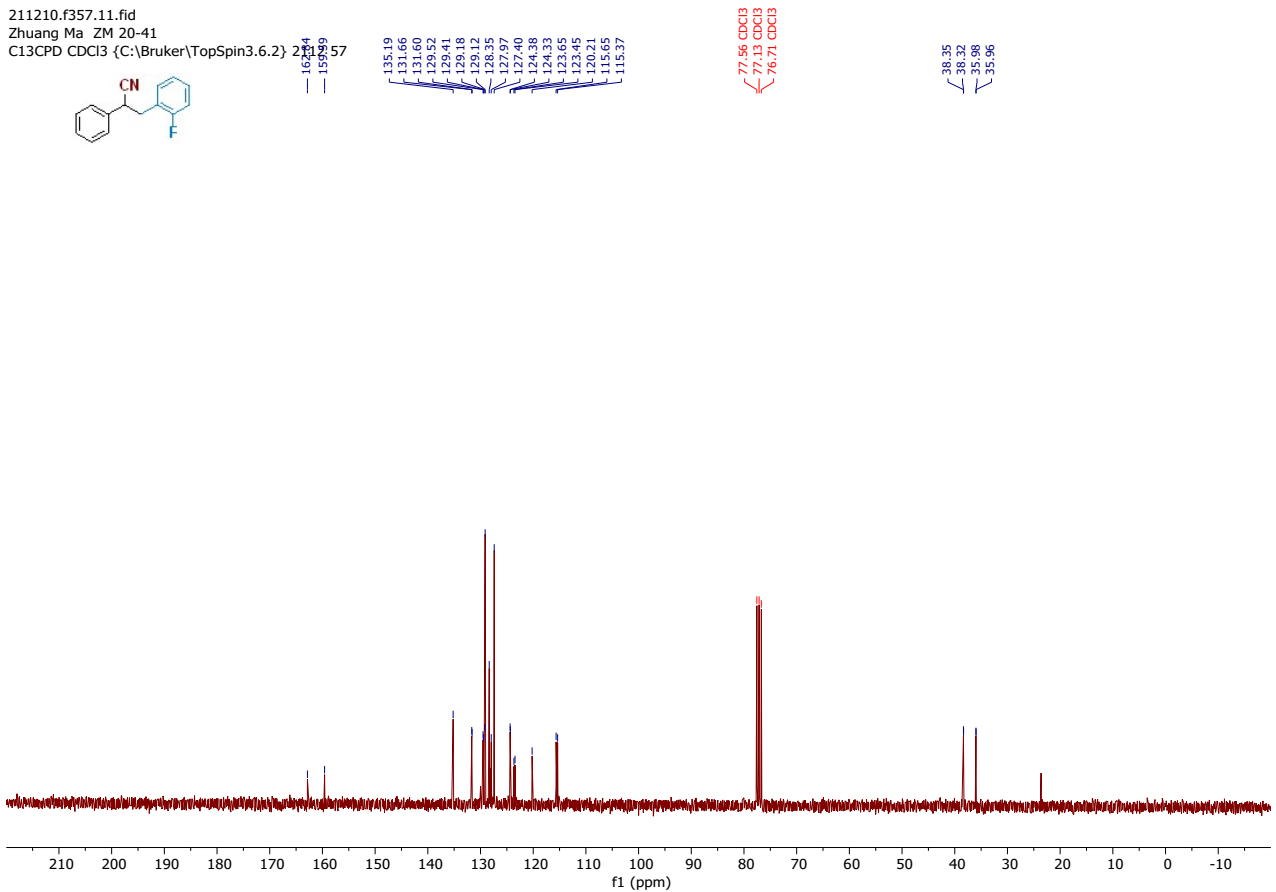

210520.456.10.fid  
Ma/ ZM20-16  
Au1H CDCl3 {C:\Bruker\TopSpin3.5pl6} 2105 56

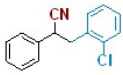

7.26 CDCl3

1.70 H2O

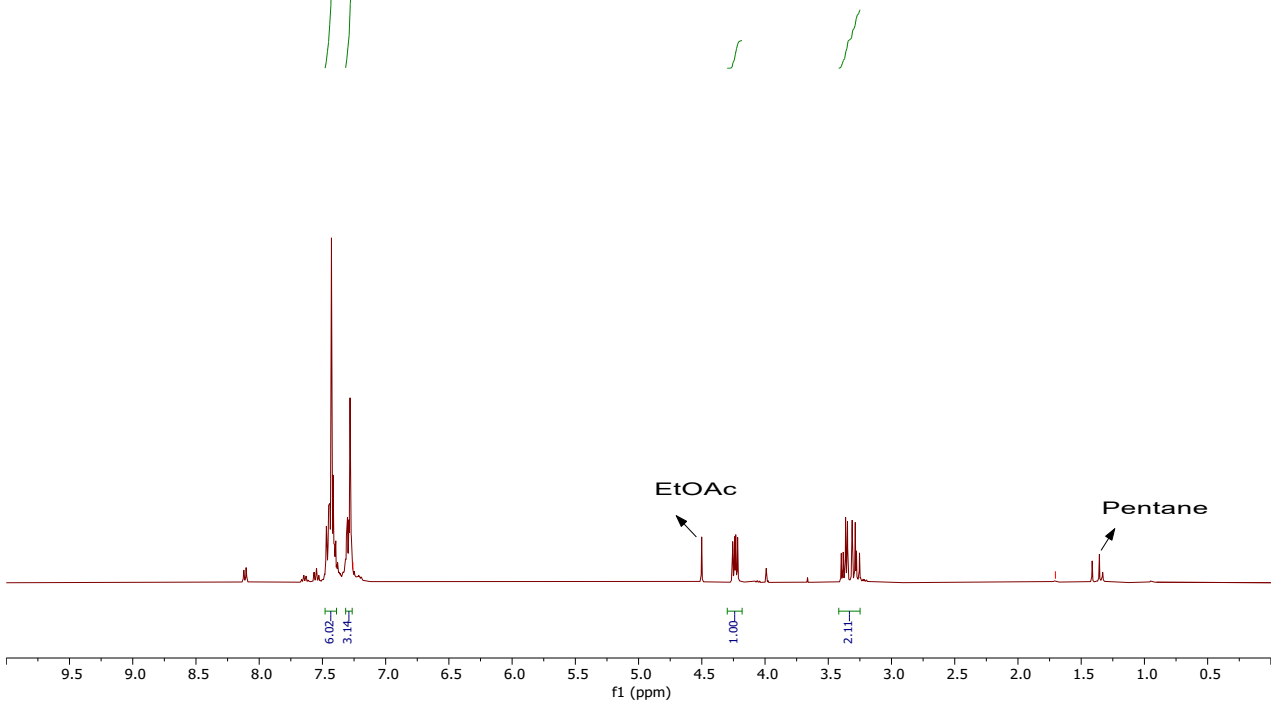

210520.456.11.fid  
Ma/ ZM20-16  
Au13C CDCl3 {C:\Bruker\TopSpin3.5pl6} 2105 56

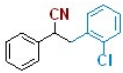

135.30  
134.21  
134.05  
131.86  
129.77  
129.15  
128.35  
127.21  
120.17

77.44 CDCl3  
77.12 CDCl3  
76.80 CDCl3

40.48  
37.68

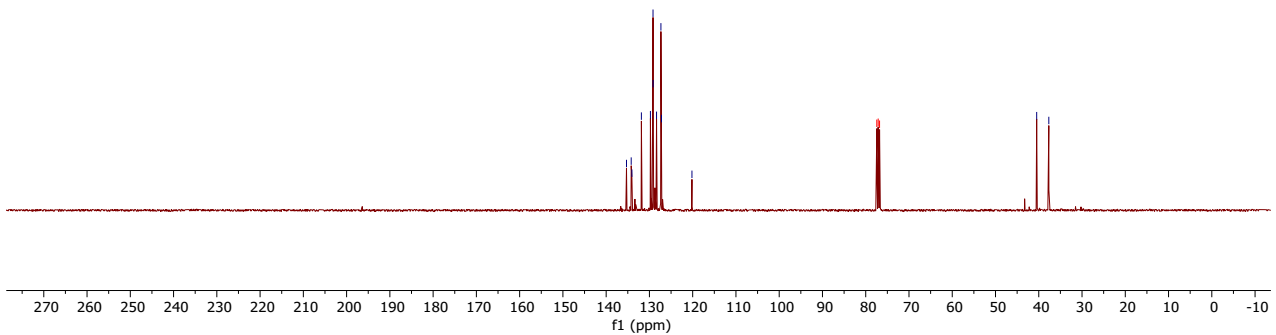

210407.306.10.fid  
Zhuang Ma ZM 20-17  
Au1H CDCl3 {C:\Bruker\TopSpin3.6.2} 2104 6

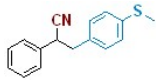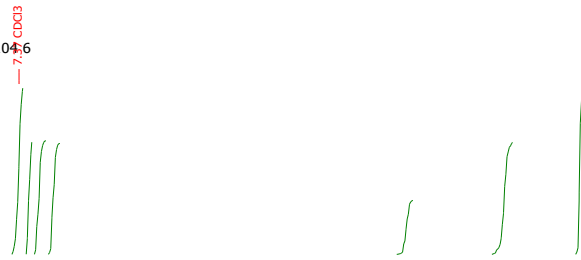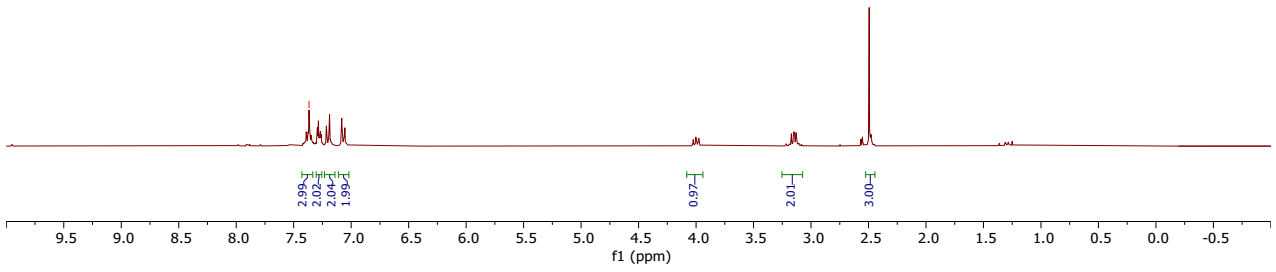

210407.306.11.fid  
Zhuang Ma ZM 20-17  
Au13C CDCl3 {C:\Bruker\TopSpin3.6.2} 2104 6

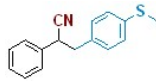

137.63  
135.97  
132.97  
128.72  
129.06  
128.25  
127.51  
126.70  
120.31  
77.47 CDCl3  
77.04 CDCl3  
76.62 CDCl3  
41.66  
39.78  
15.79

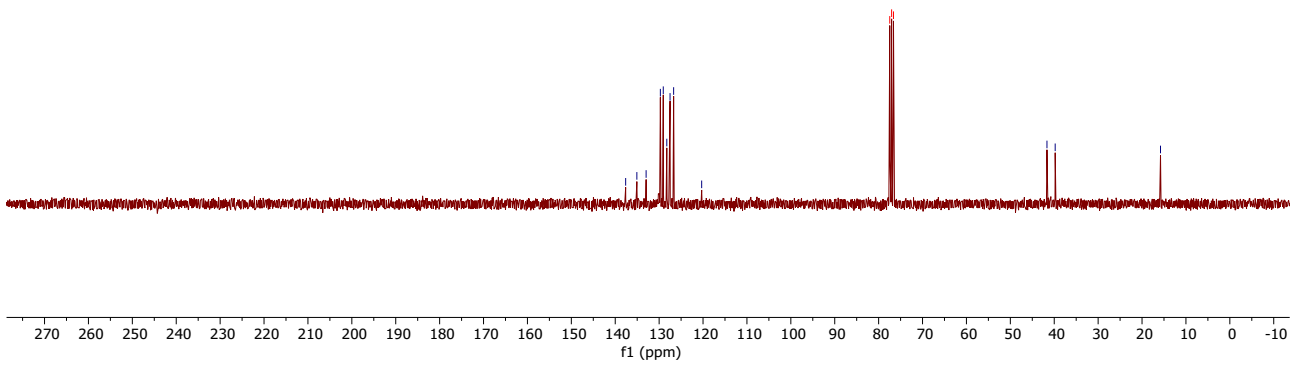

220121.316.10.fid  
Zhuang Ma ZM20-6  
Au1H CDCl3 {C:\Bruker\TopSpin3.6.2} 2201 16

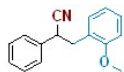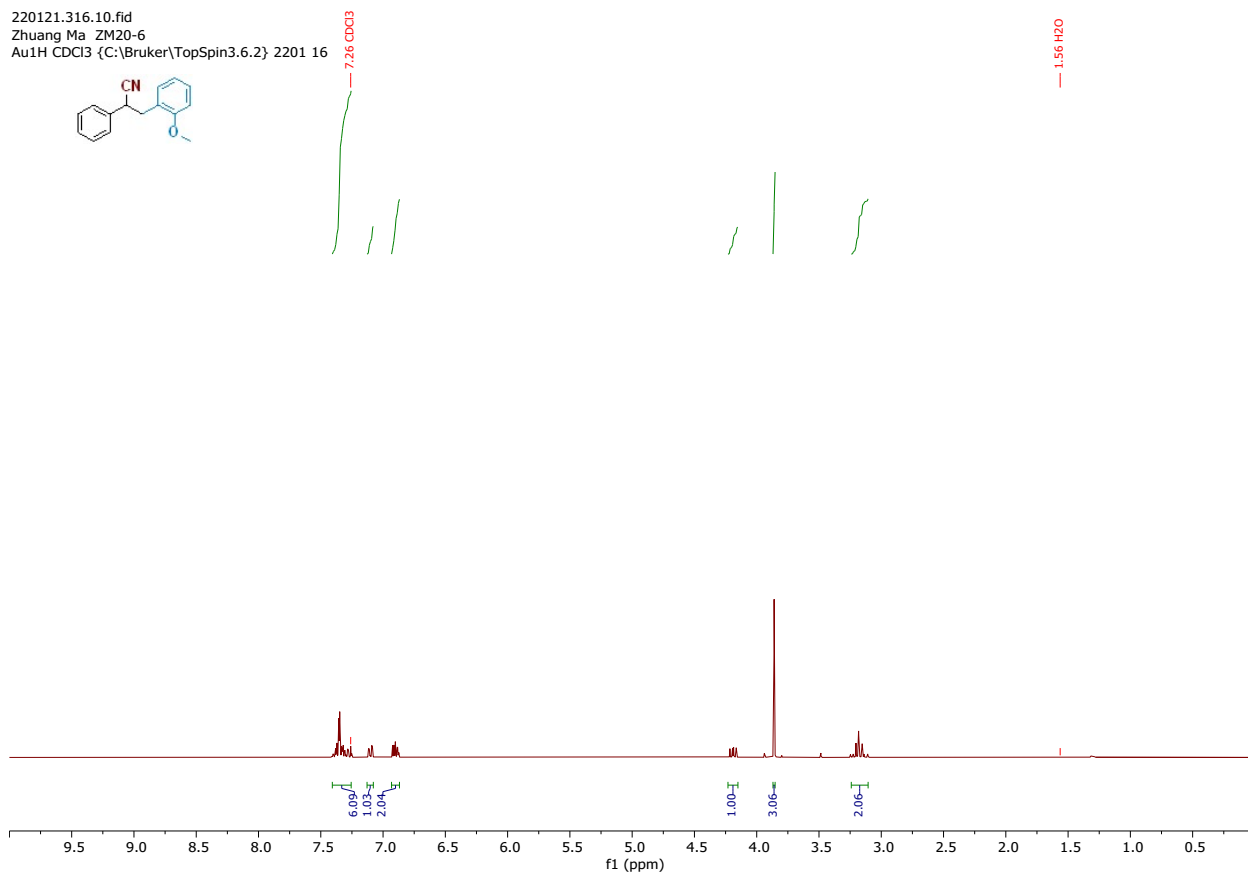

220121.316.11.fid  
Zhuang Ma ZM20-6  
Au13C CDCl3 {C:\Bruker\TopSpin3.6.2} 2201 16

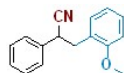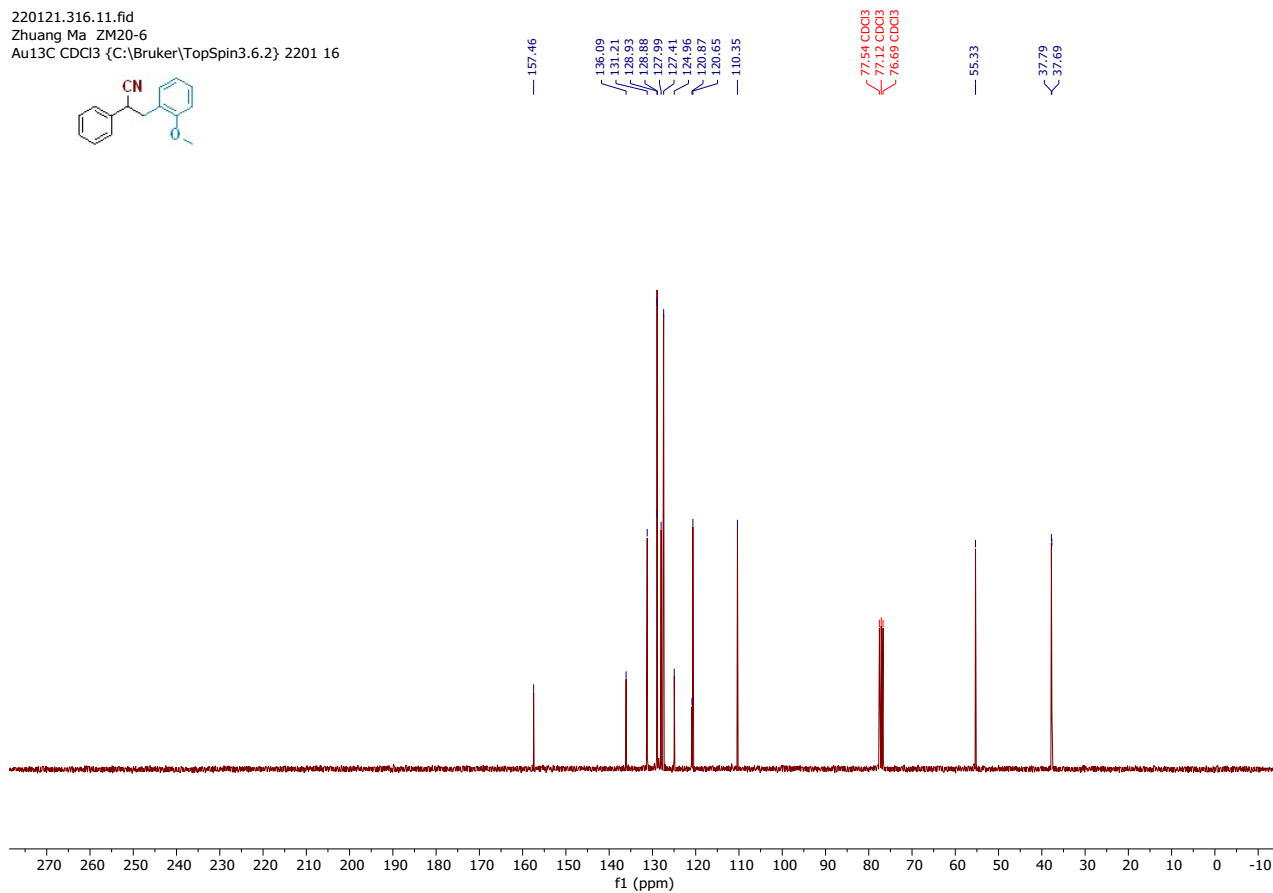

211210.f348.10.fid  
Zhuang Ma\_ZM 20-15  
PROTON CDCl3 {C:\Bruker\TopSpin3.6.2} 2112 48

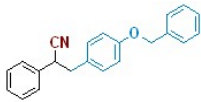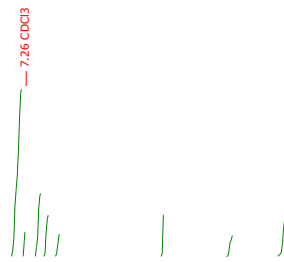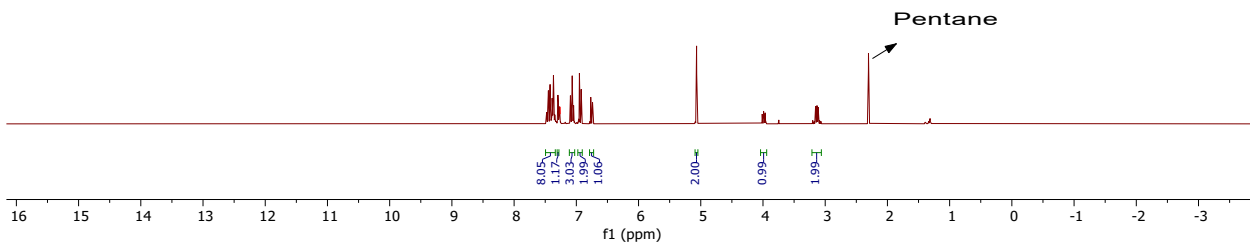

211210.f348.11.fid  
Zhuang Ma\_ZM 20-15  
C13CPD CDCl3 {C:\Bruker\TopSpin3.6.2} 2112 48

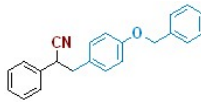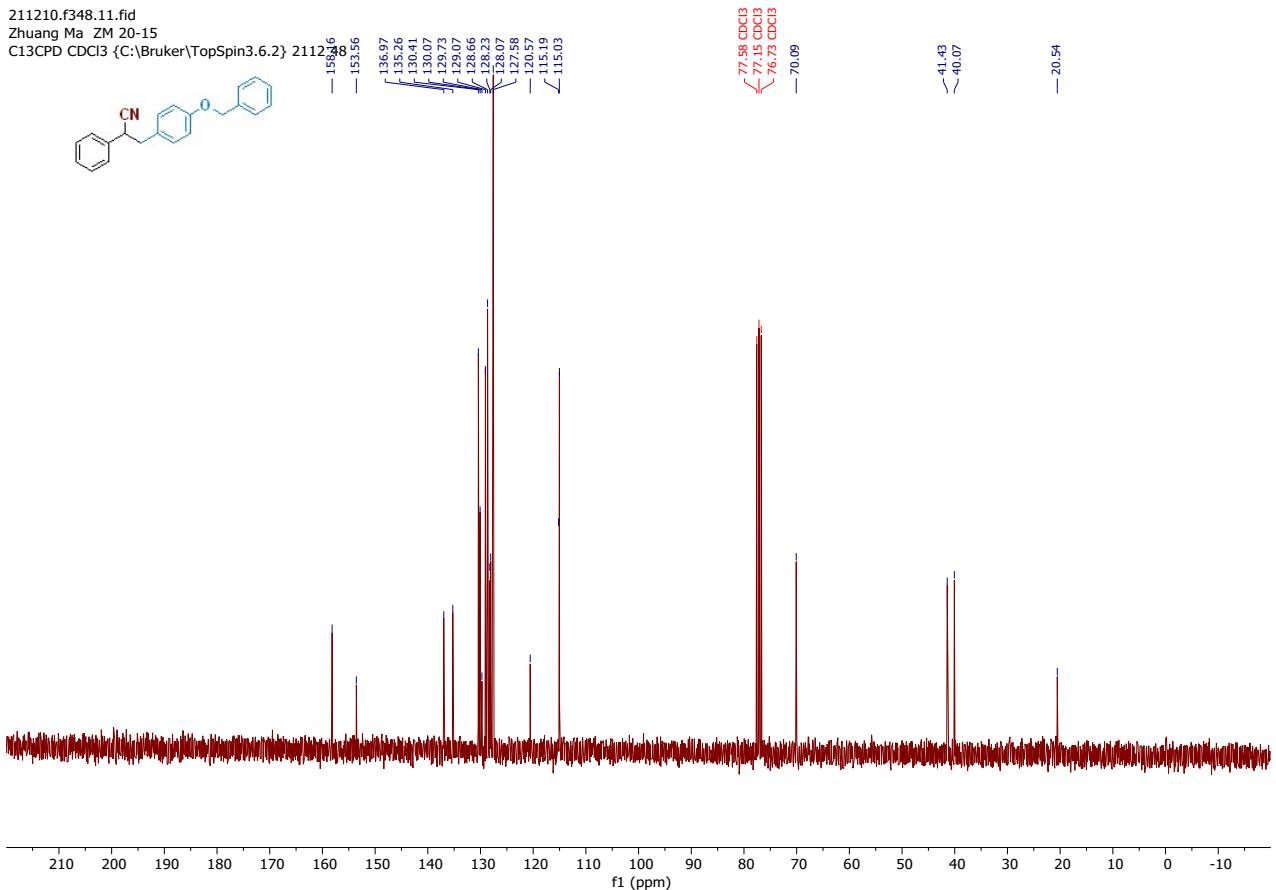



220131.307.10.fid  
Ma/ ZM-20-44  
Au1H CDCl3 {C:\Bruker\TopSpin3.6.2} 2201 7

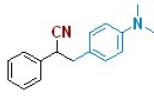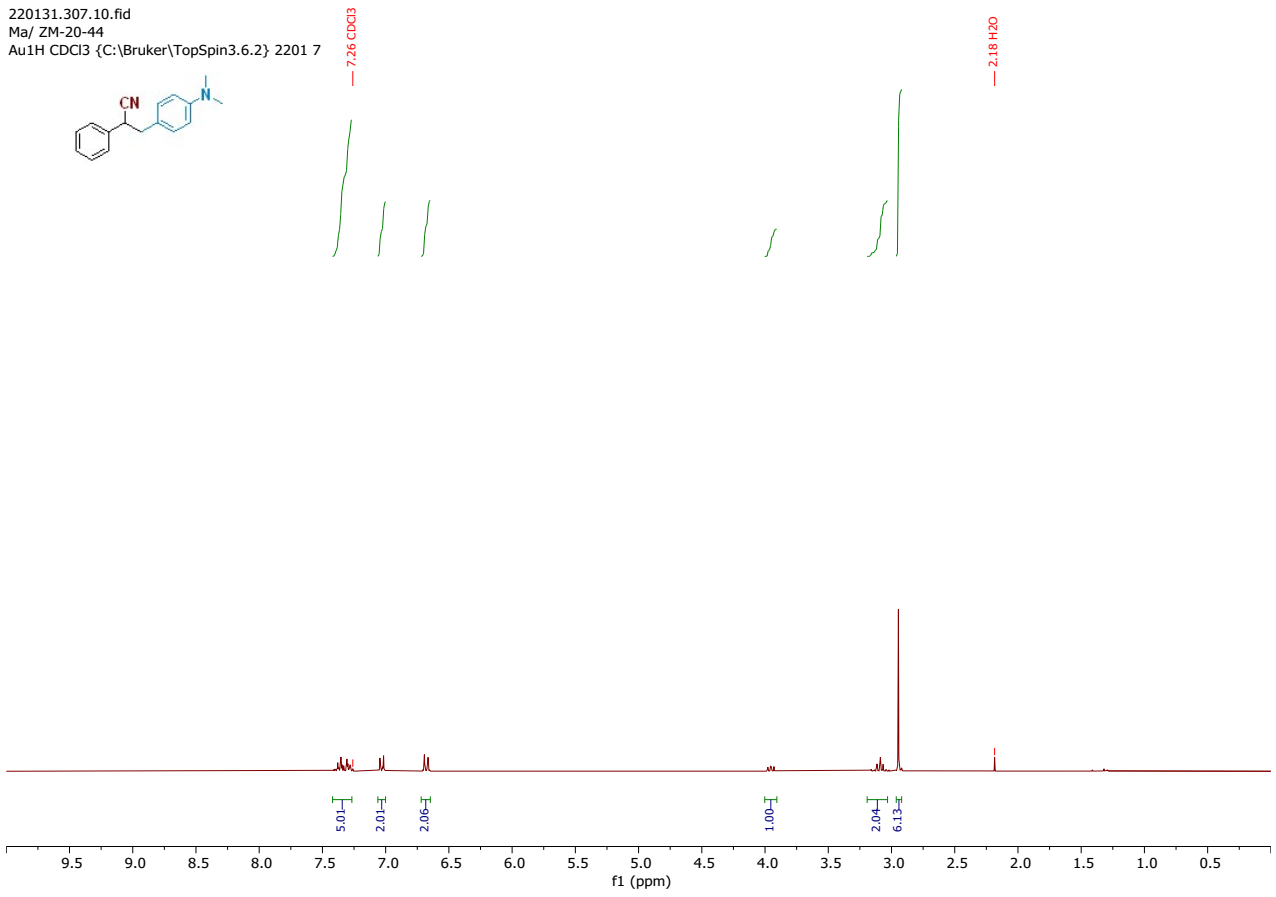

220131.307.11.fid  
Ma/ ZM-20-44  
Au13C CDCl3 {C:\Bruker\TopSpin3.6.2} 2201 7

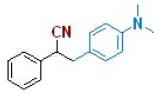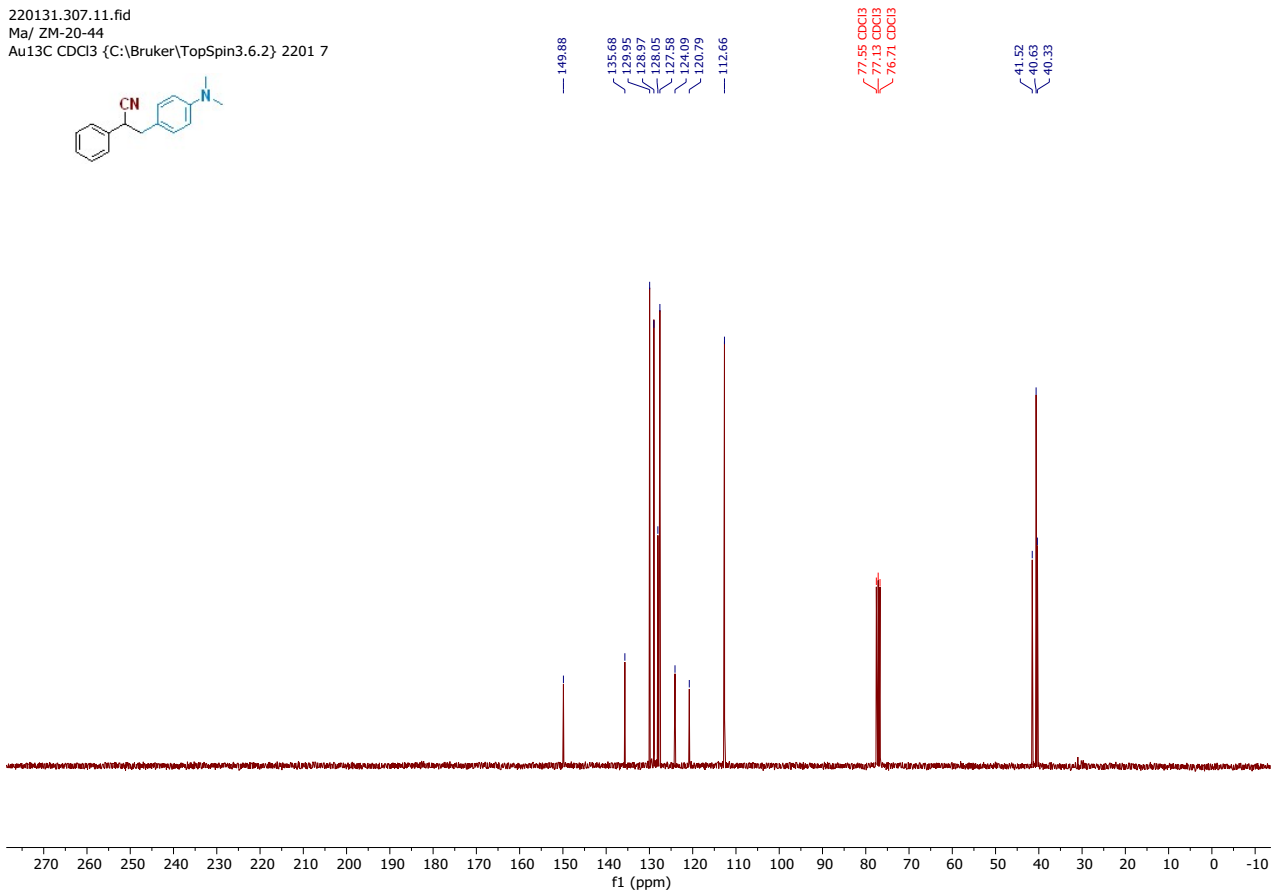

210714.316.10.fid  
Zhuang Ma ZM20-9  
Au1H CDCl3 {C:\Bruker\TopSpin3.6.2} 2107 16

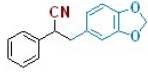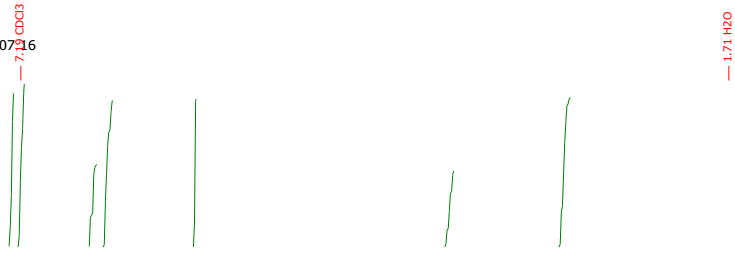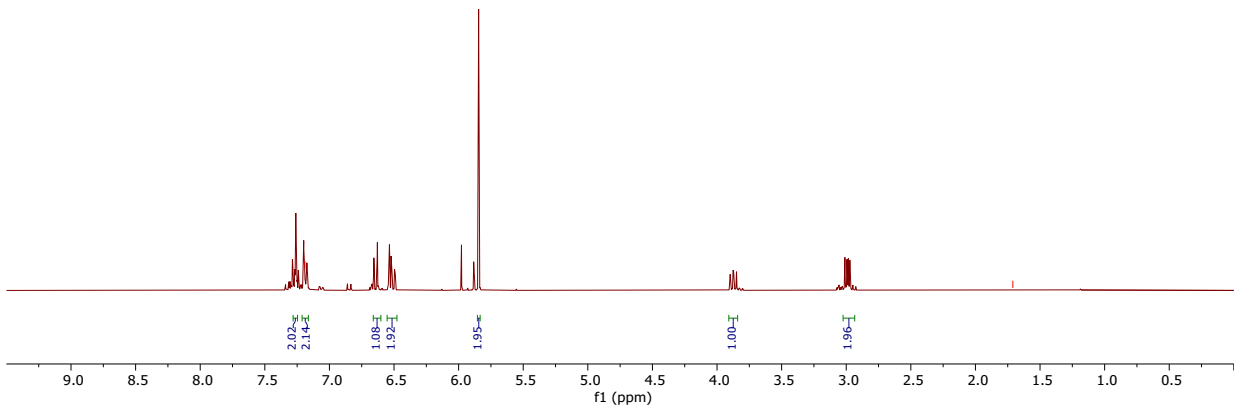

210714.316.11.fid  
Zhuang Ma ZM20-9  
Au13C CDCl3 {C:\Bruker\TopSpin3.6.2} 2107 16

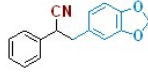

147.77  
146.90  
135.16  
129.97  
128.76  
127.50  
122.53  
120.40  
109.51  
108.38  
101.09  
77.55 CDCl3  
77.13 CDCl3  
76.70 CDCl3  
41.95  
40.04

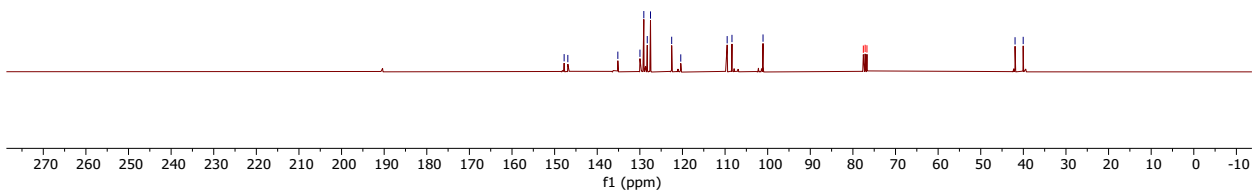

210705.306.10.fid  
Zhuang Ma\_ZM 20-8  
Au1H CDCl3 {C:\Bruker\TopSpin3.6.2} 2107

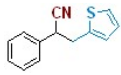

77.00 CDCl3

1.59 H2O

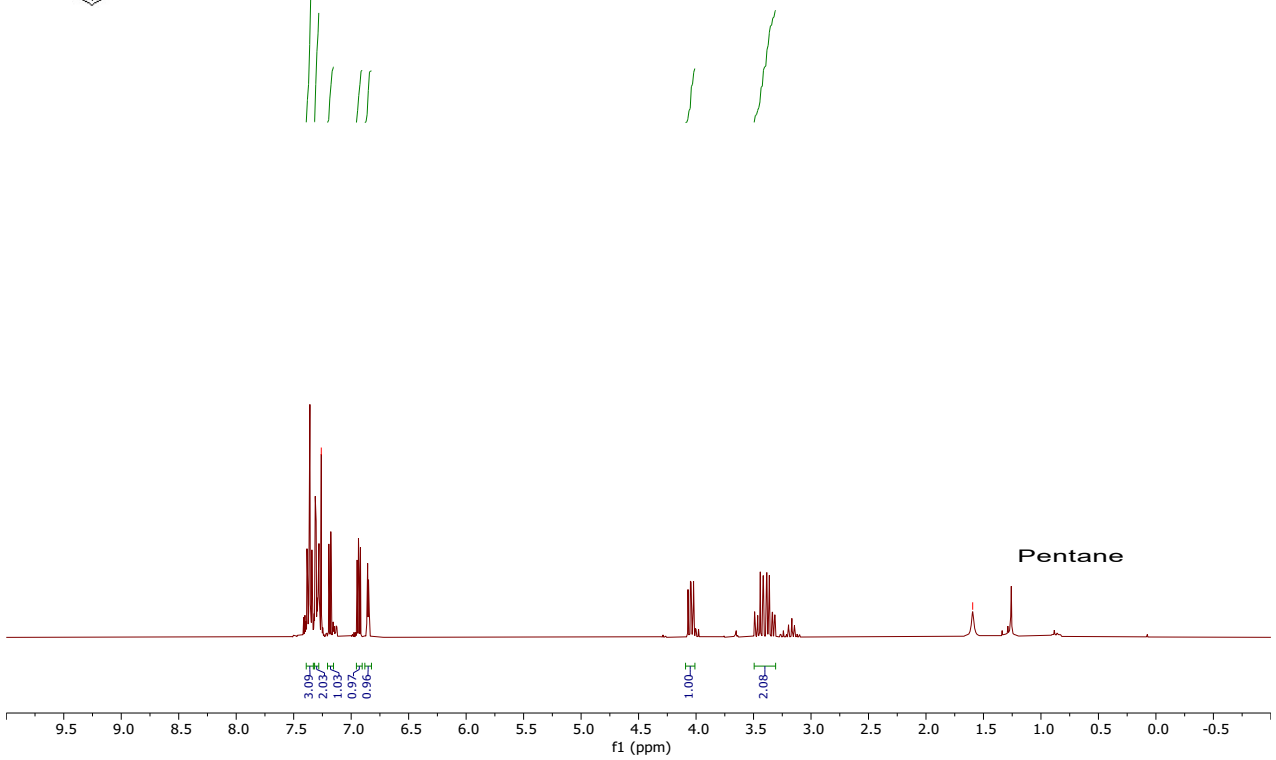

210705.306.11.fid  
Zhuang Ma\_ZM 20-8  
Au13C CDCl3 {C:\Bruker\TopSpin3.6.2} 2107 6



137.62  
134.74  
129.12  
128.44  
127.48  
127.00  
124.94  
120.13

77.46 CDCl3  
77.04 CDCl3  
76.62 CDCl3

40.11  
36.21

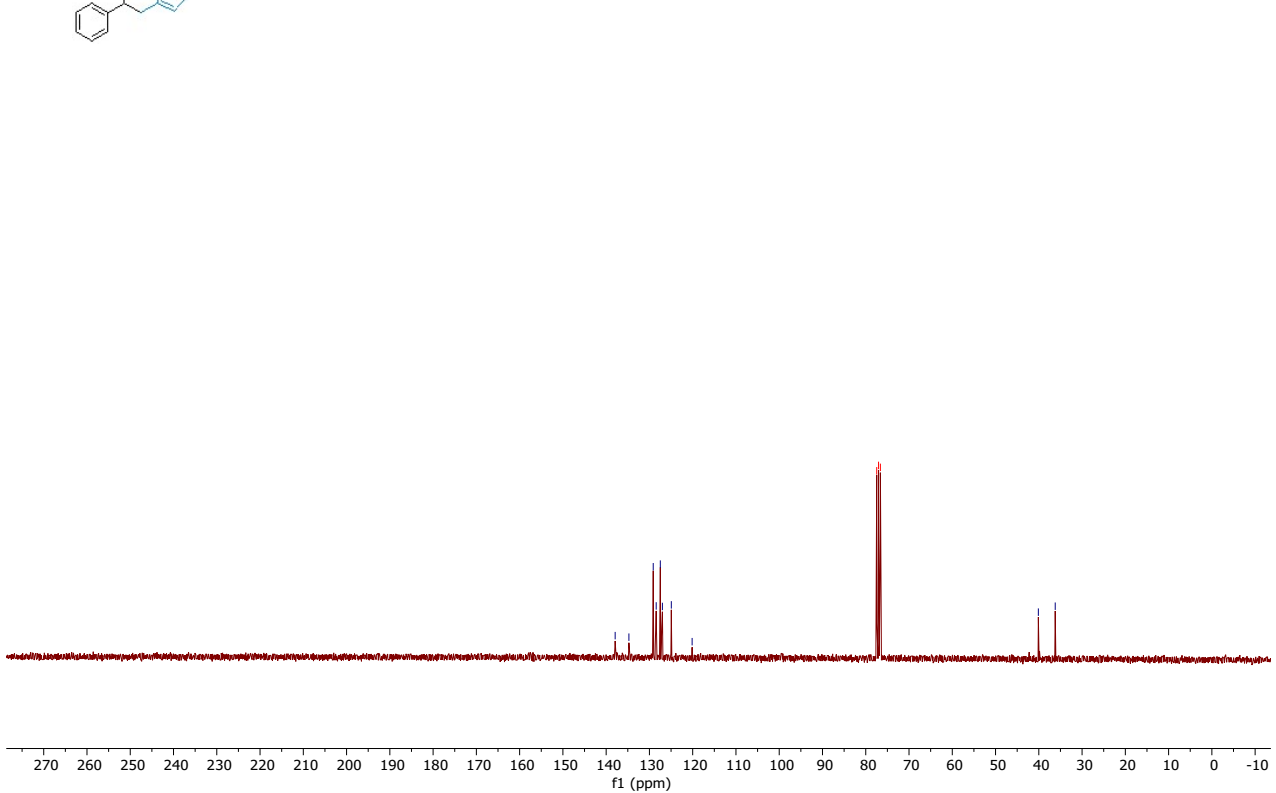

211126.401.10.fid  
Zhuang Ma ZM 20-7  
Au1H CDCl3 {C:\Bruker\TopSpin3.5pl6} 2111 1

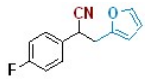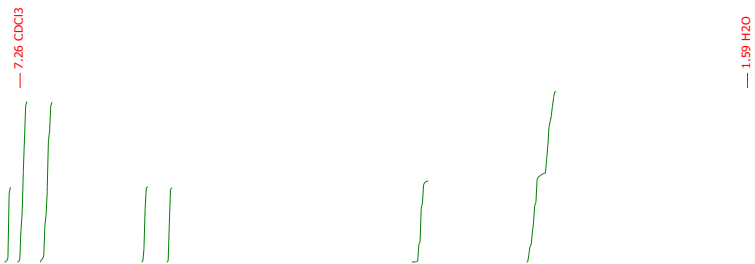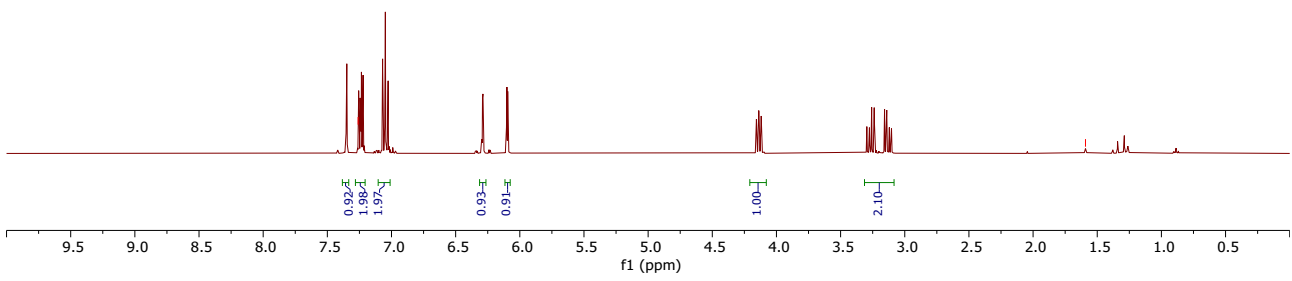

211126.401.11.fid  
Zhuang Ma ZM 20-7  
Au13C CDCl3 {C:\Bruker\TopSpin3.5pl6} 2111 1

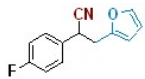

163.76  
161.30  
149.64  
142.27  
130.66  
130.62  
129.11  
129.02  
119.97  
118.37  
115.98  
110.56  
108.43  
77.39 CDCl3  
77.07 CDCl3  
76.75 CDCl3  
36.33  
34.65

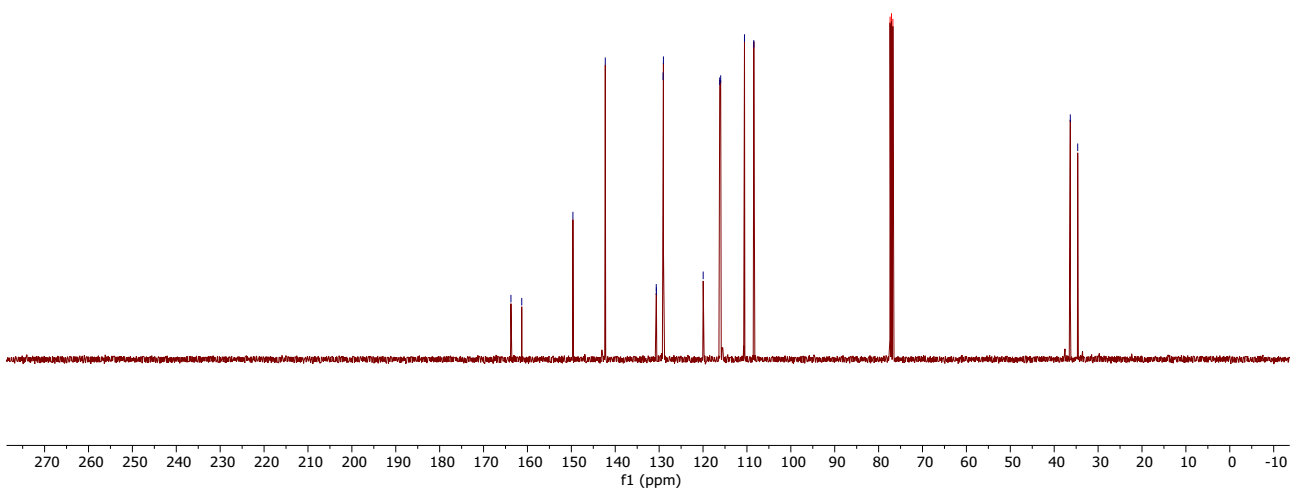

220127.322.10.fid  
Ma/ ZM20-7  
Au19F CDC13 {C:\Bruker\TopSpin3.6.2} 2201 22

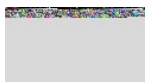

— -113.31

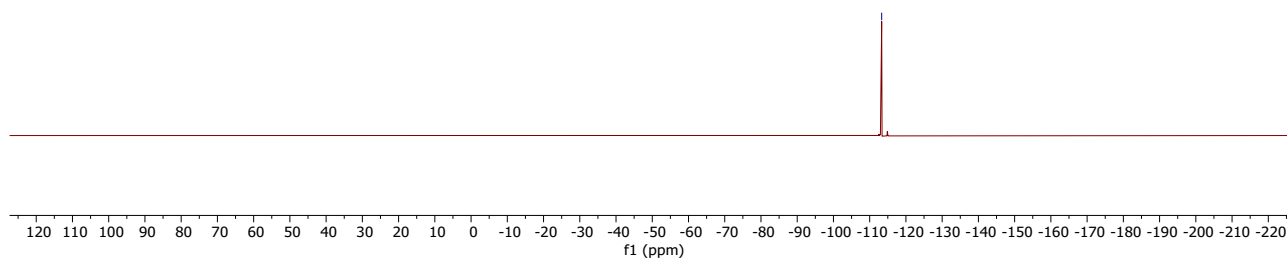

211210.f356.10.fid  
Zhuang Ma\_ZM\_20-39  
PROTON CDCl3 {C:\Bruker\TopSpin3.6.2} 2112 56

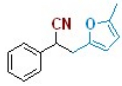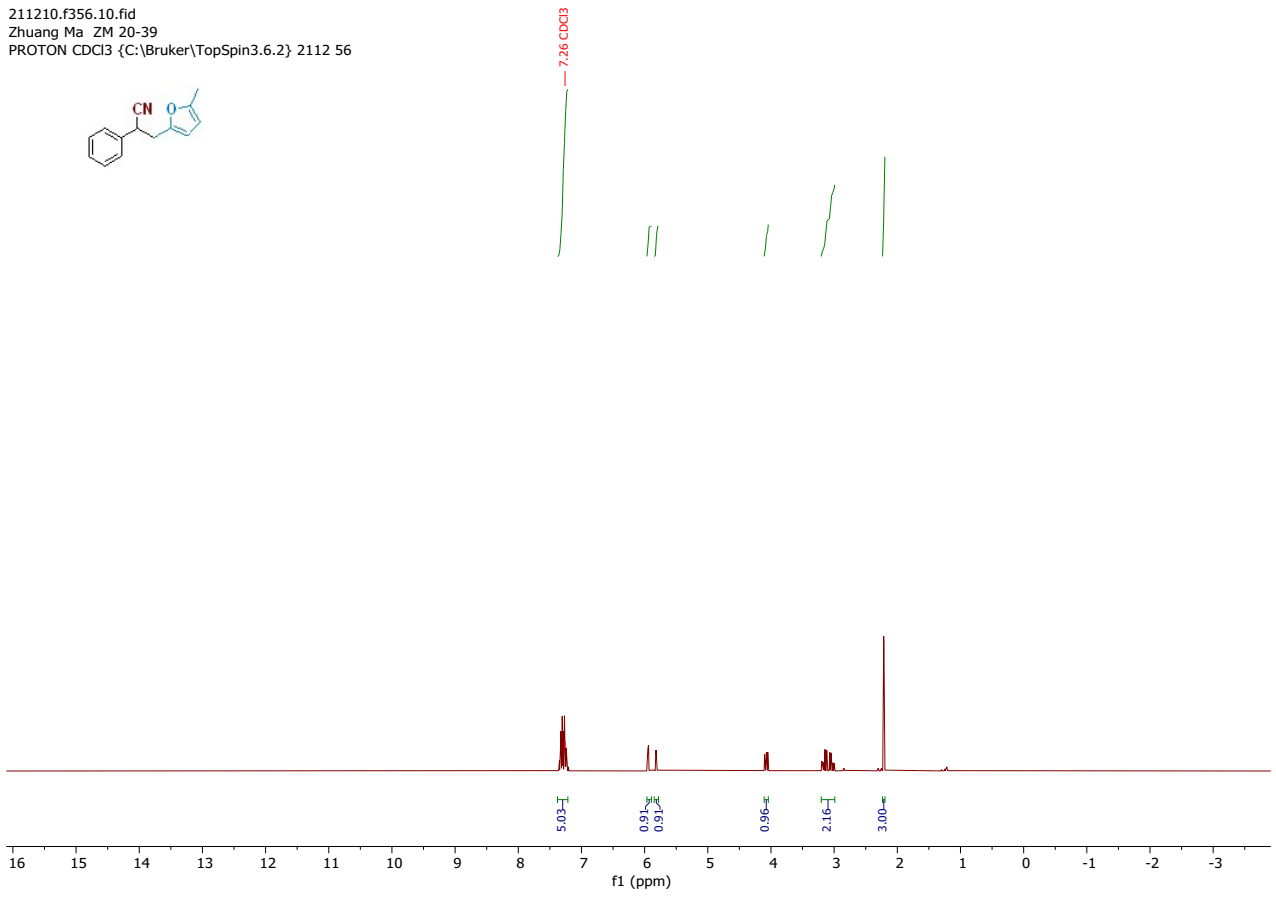

211210.f356.11.fid  
Zhuang Ma\_ZM\_20-39  
C13CPD CDCl3 {C:\Bruker\TopSpin3.6.2} 2112 56

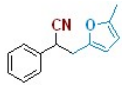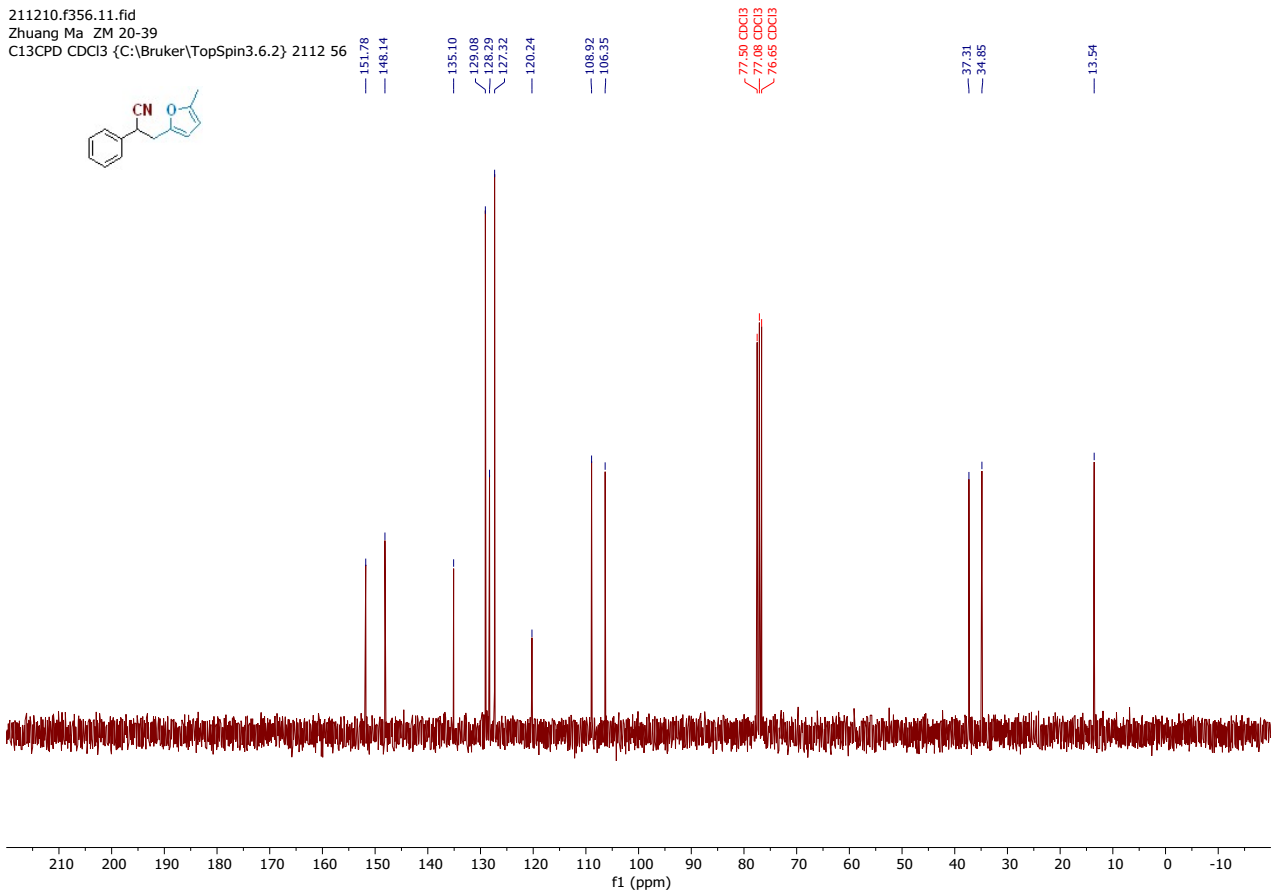

211210.f350.10.fid  
 Zhuang Ma\_ZM 20-42  
 PROTON CDCl3 {C:\Bruker\TopSpin3.6.2} 2112 50

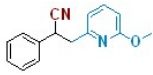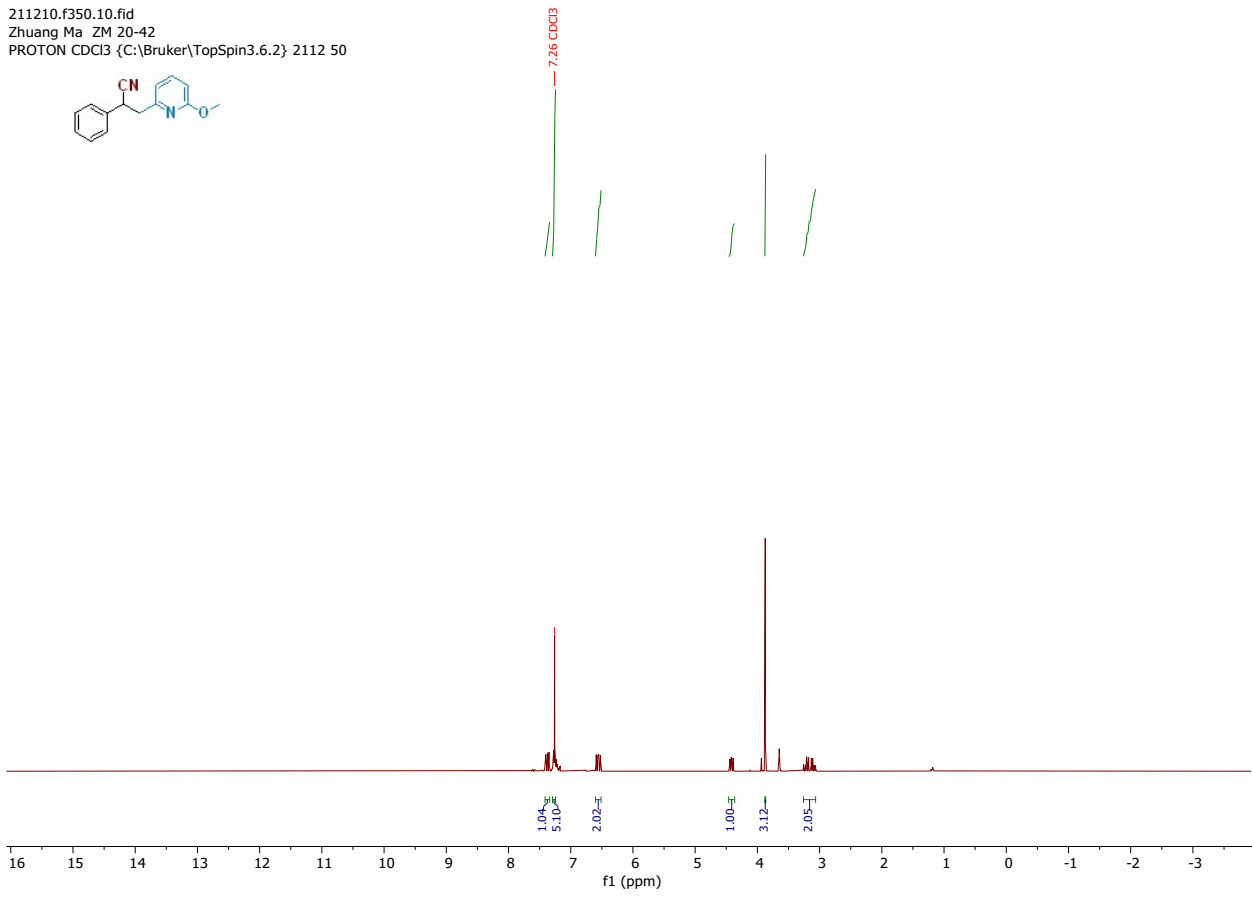

211210.f350.11.fid  
 Zhuang Ma\_ZM 20-42  
 C13CPD CDCl3 {C:\Bruker\TopSpin3.6.2}

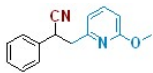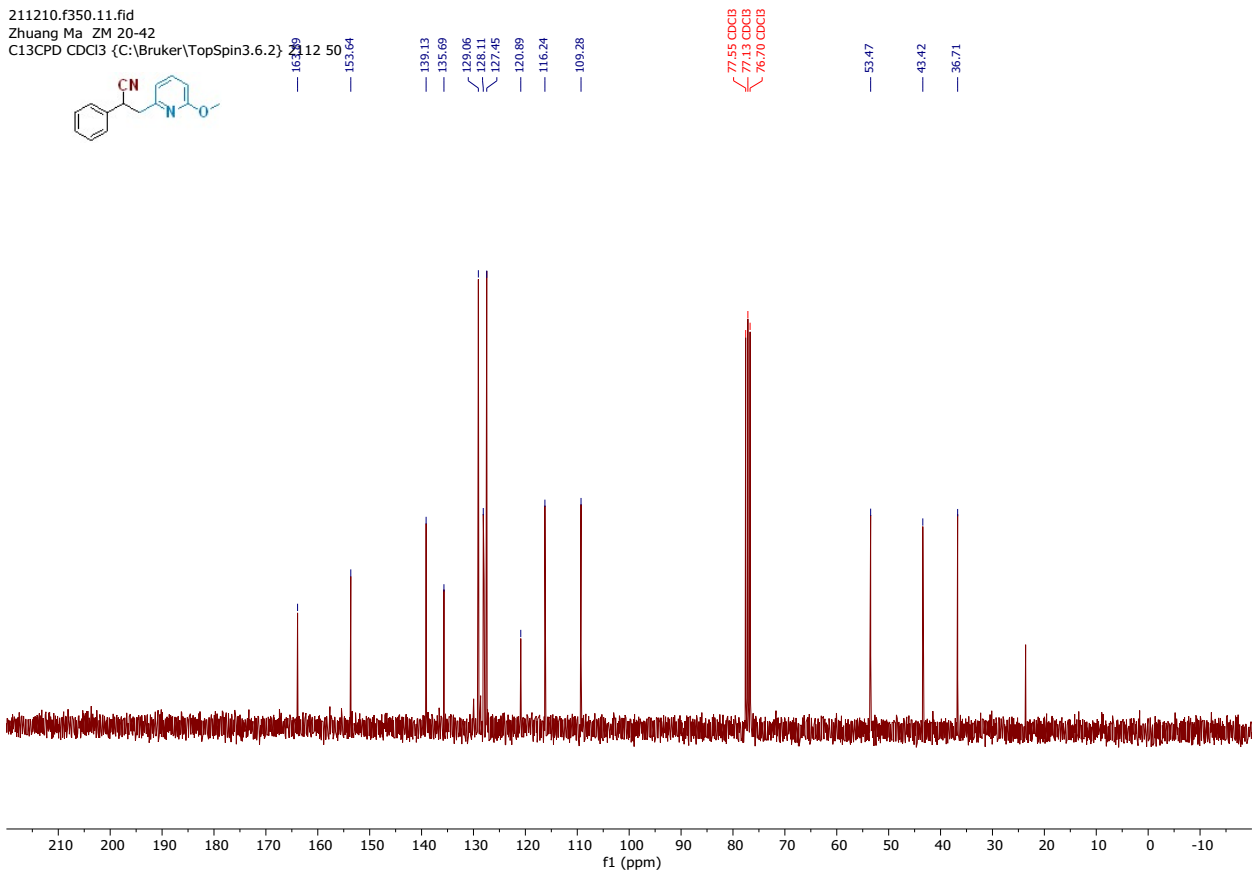

220203.320.10.fid  
Ma/ ZM20-5-2  
Au1H CDCl3 {C:\Bruker\TopSpin3.6.2} 2202 20

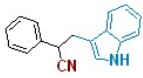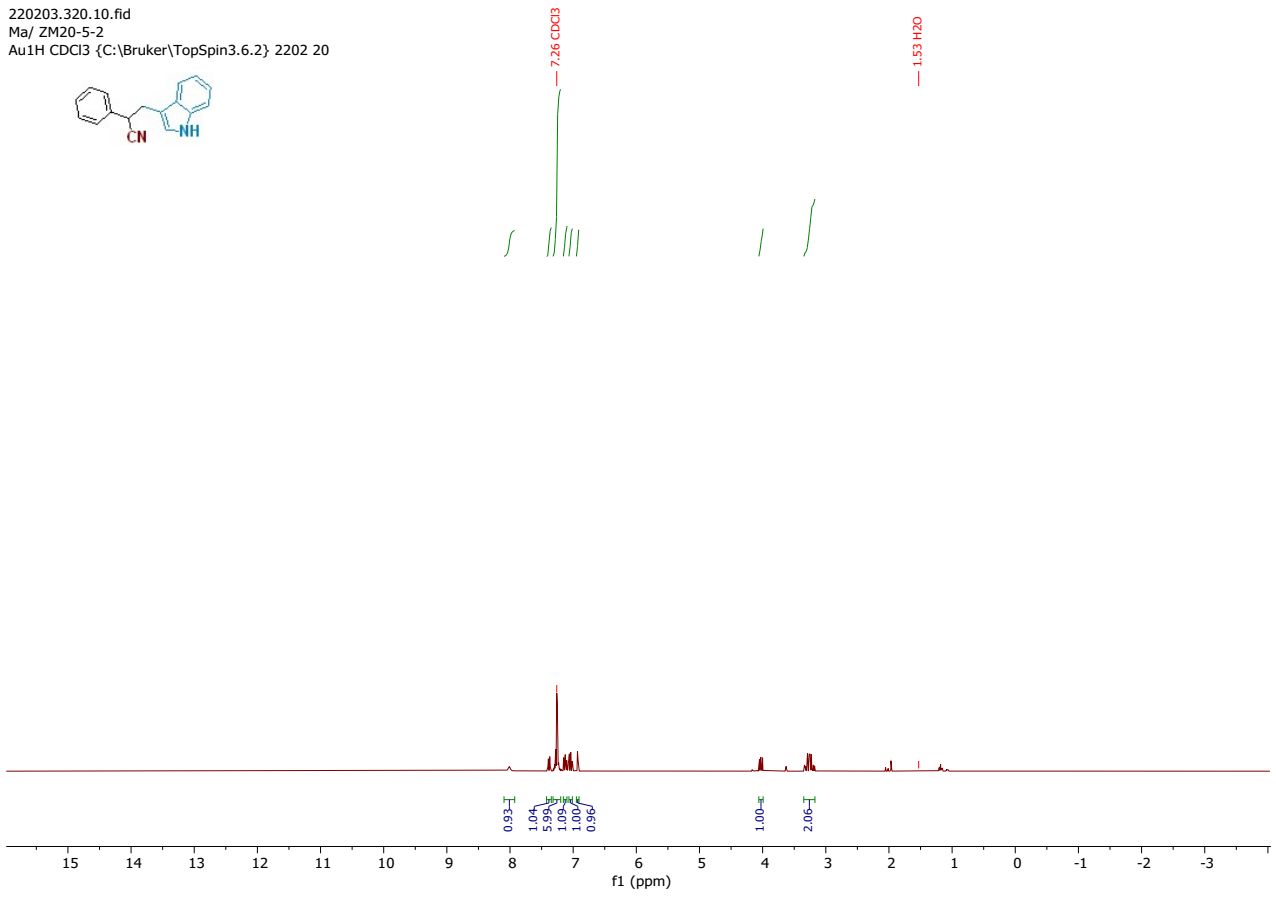

220203.320.11.fid  
Ma/ ZM20-5-2  
Au13C CDCl3 {C:\Bruker\TopSpin3.6.2} 2202 20

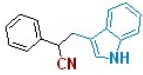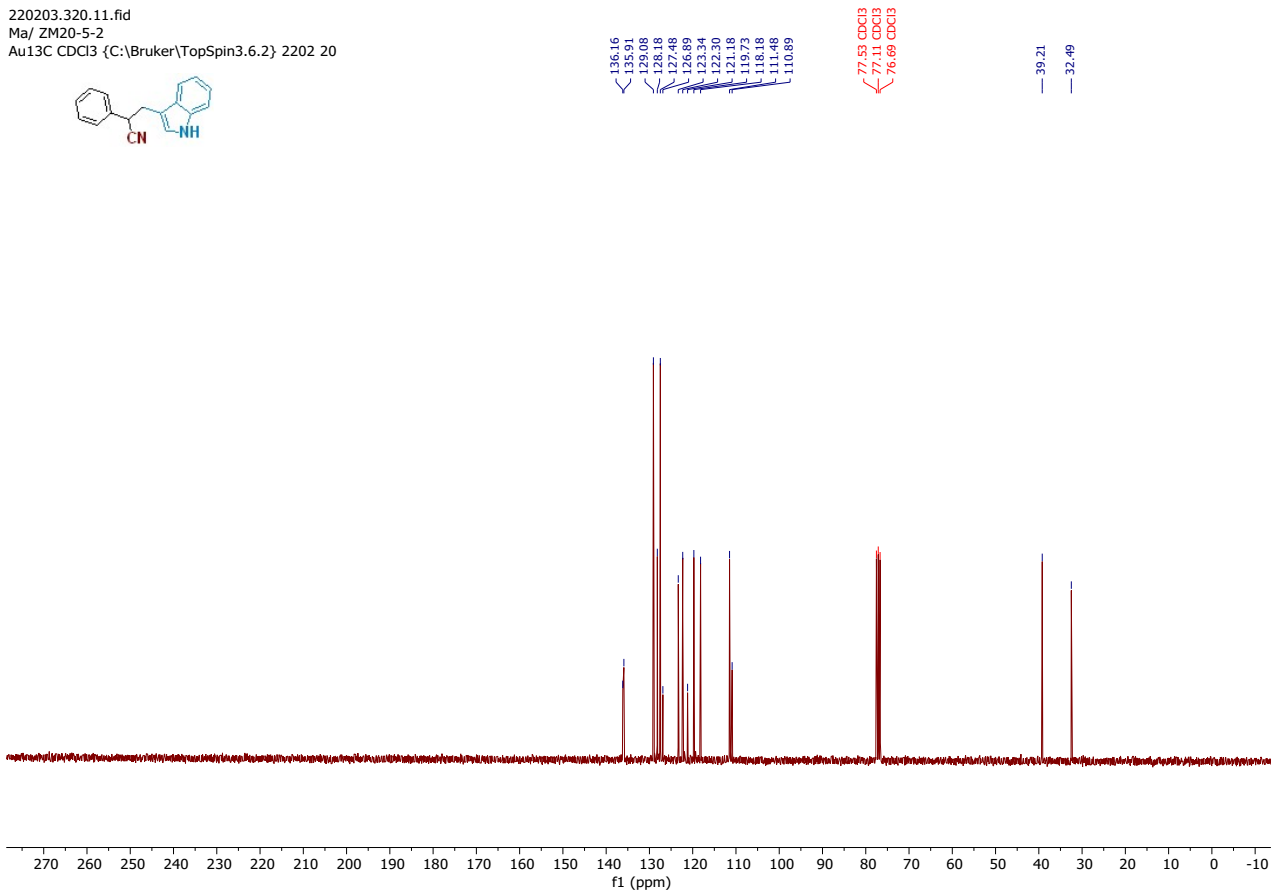



210406.f305.10.fid  
Zhuang Ma\_ZM20-21-2  
PROTON CDCl3 {C:\Bruker\TopSpin3.6.2} 2104 5

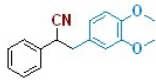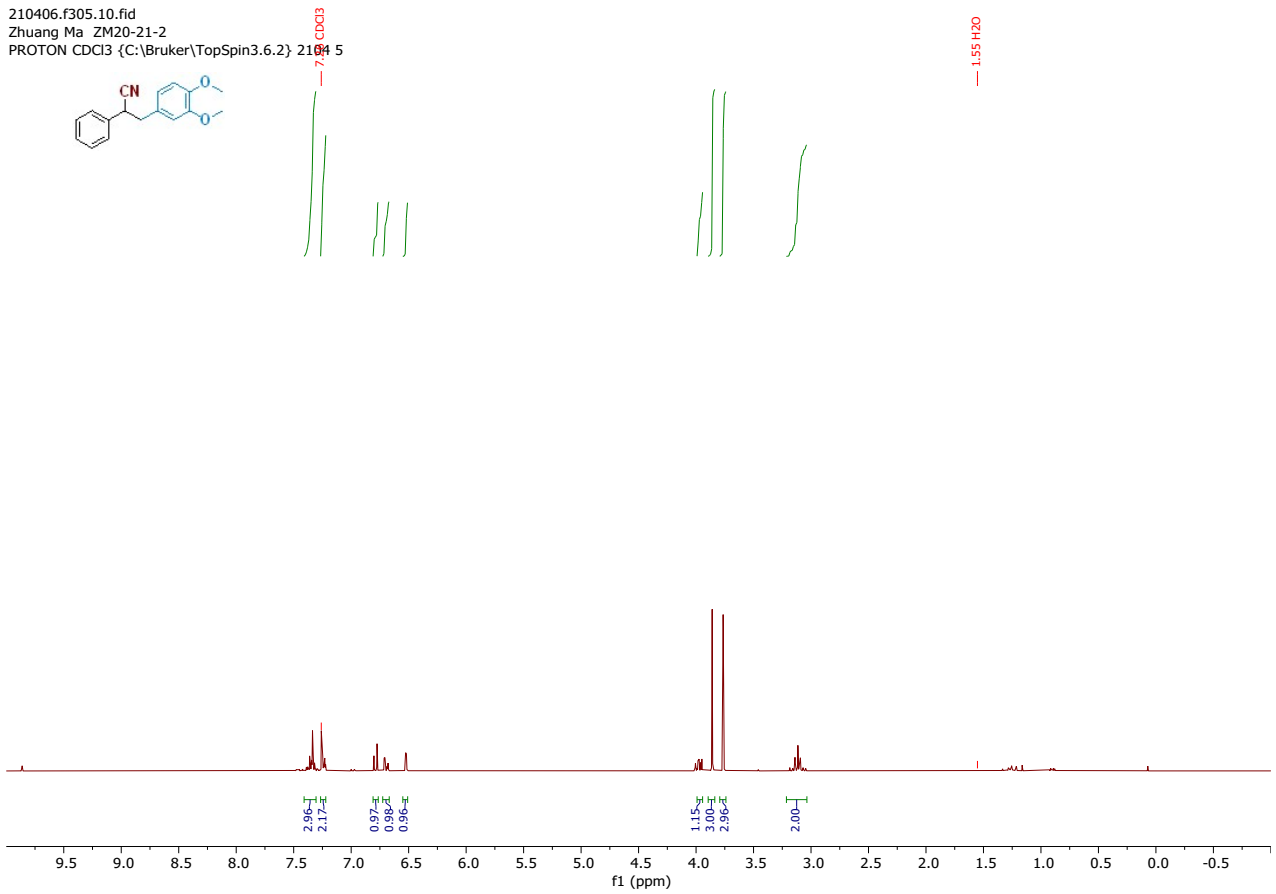

210406.f305.11.fid  
Zhuang Ma\_ZM20-21-2  
C13CPD CDCl3 {C:\Bruker\TopSpin3.6.2} 2104 5

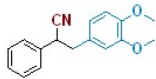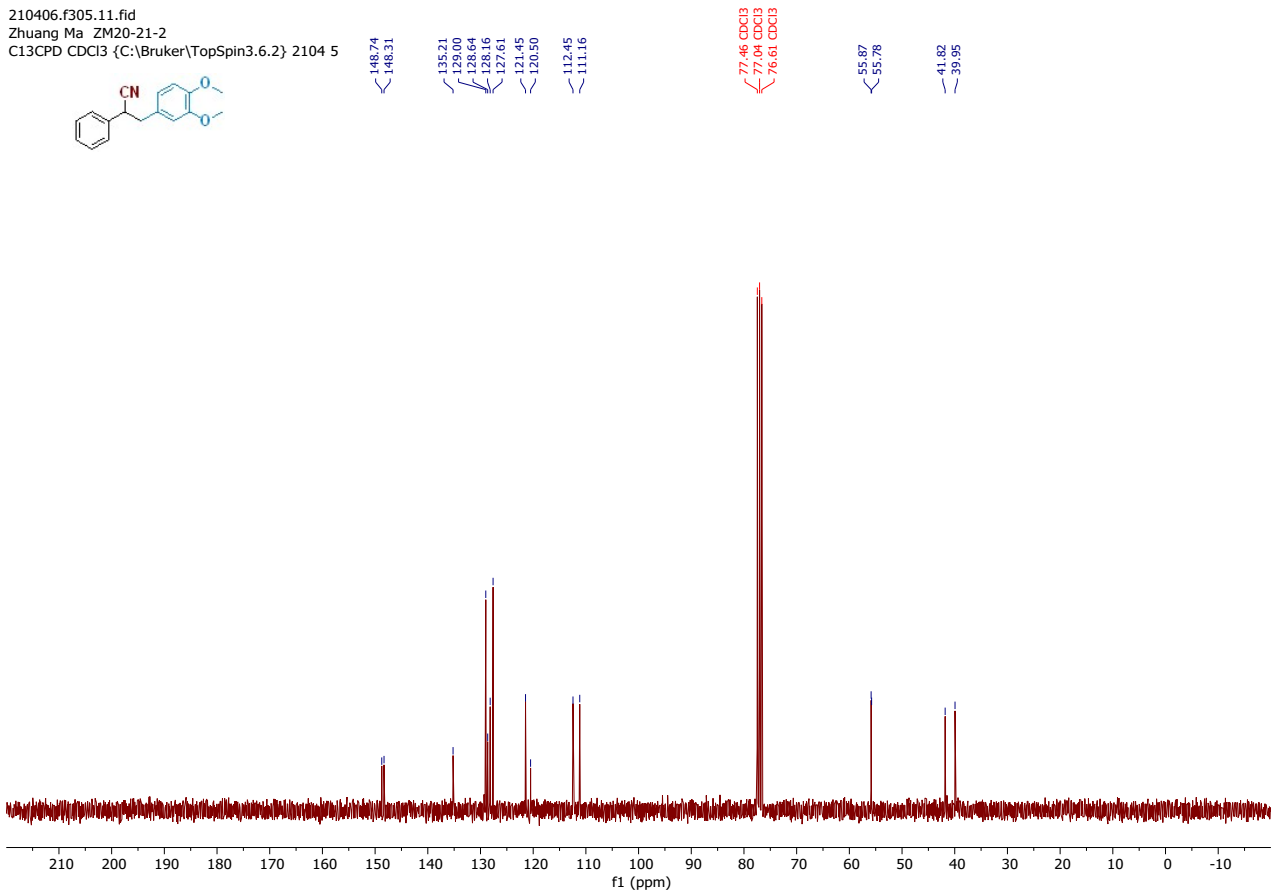

220304.f342.10.fid  
Zhuang Ma\_ZM20-203  
PROTON CDCl3 {C:\Bruker\TopSpin3.6.2} 2203 42

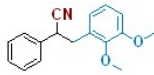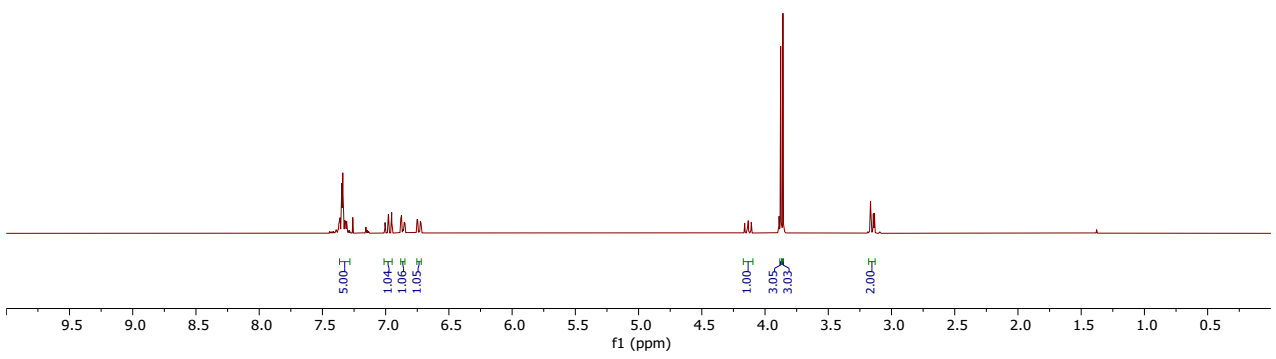

220304.f342.11.fid  
Zhuang Ma\_ZM20-203  
C13CPD CDCl3 {C:\Bruker\TopSpin3.6.2} 2203 42

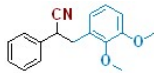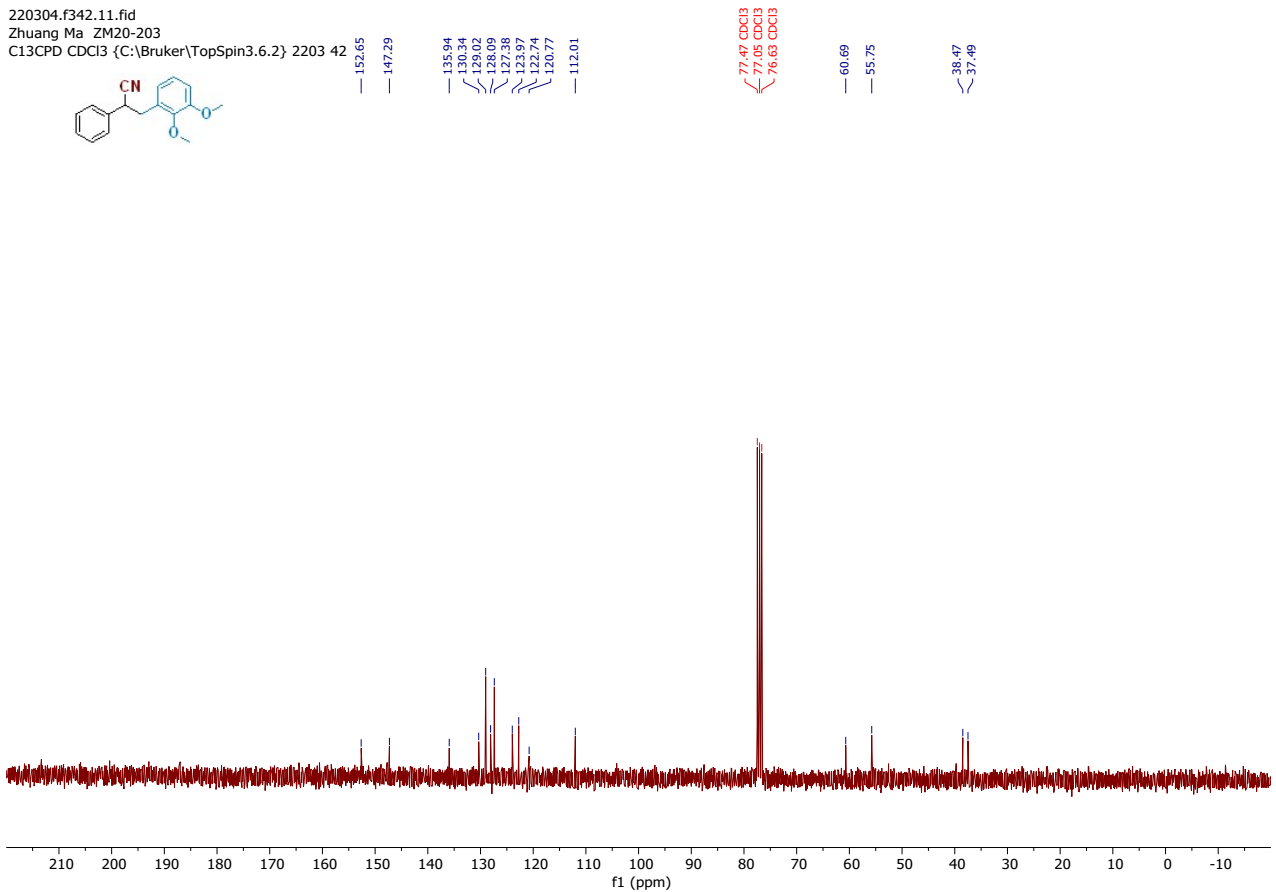

220206.357.10.fid  
ZHUANG MA, zm 20-31  
Au1H CDCl3 {C:\Bruker\TopSpin3.6.2} 2202 57

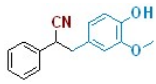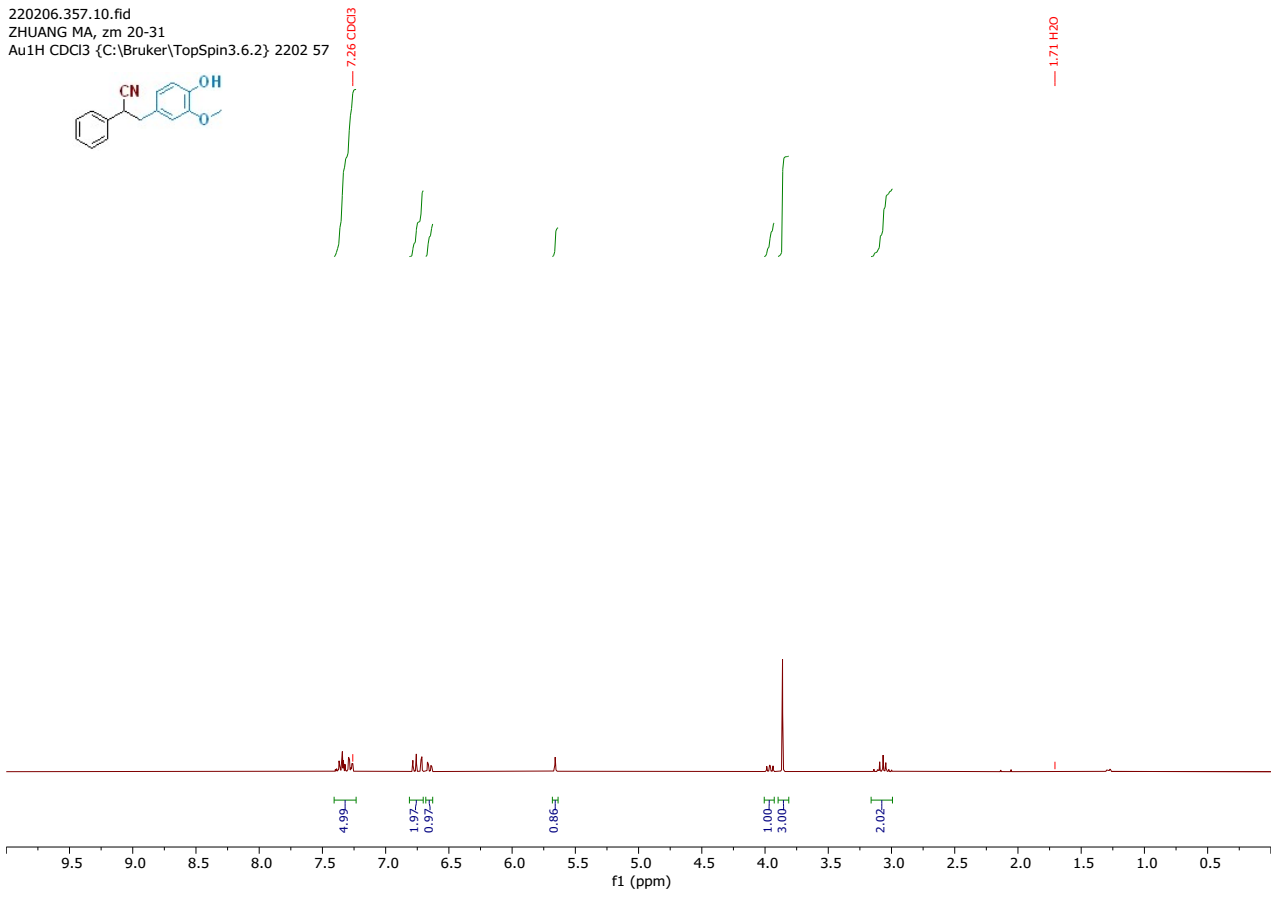

220206.357.11.fid  
ZHUANG MA, zm 20-31  
Au13C CDCl3 {C:\Bruker\TopSpin3.6.2} 2202 57

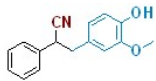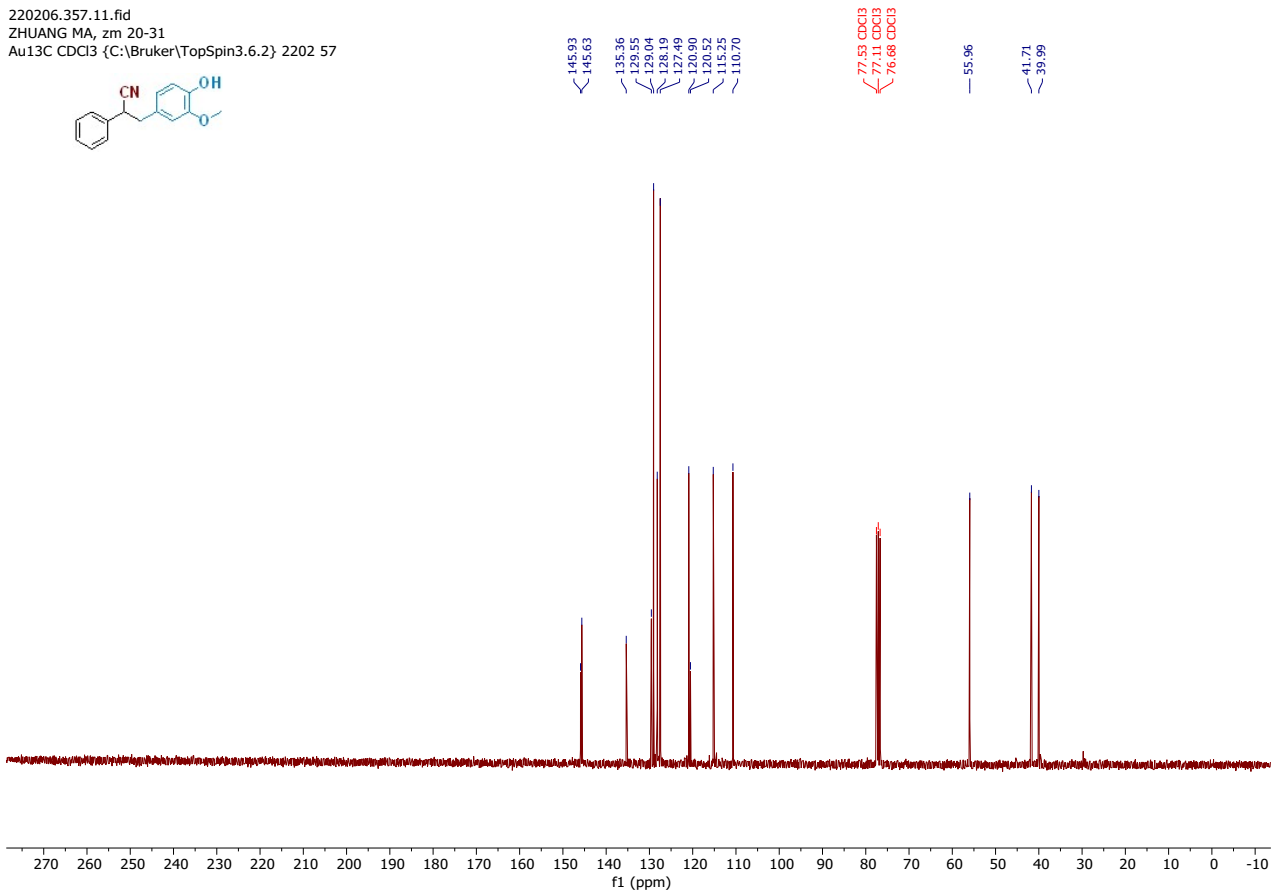

220203.323.10.fid  
Ma/ ZM20-18-1  
Au1H CDCl3 {C:\Bruker\TopSpin3.6.2} 2202 23

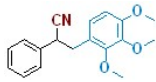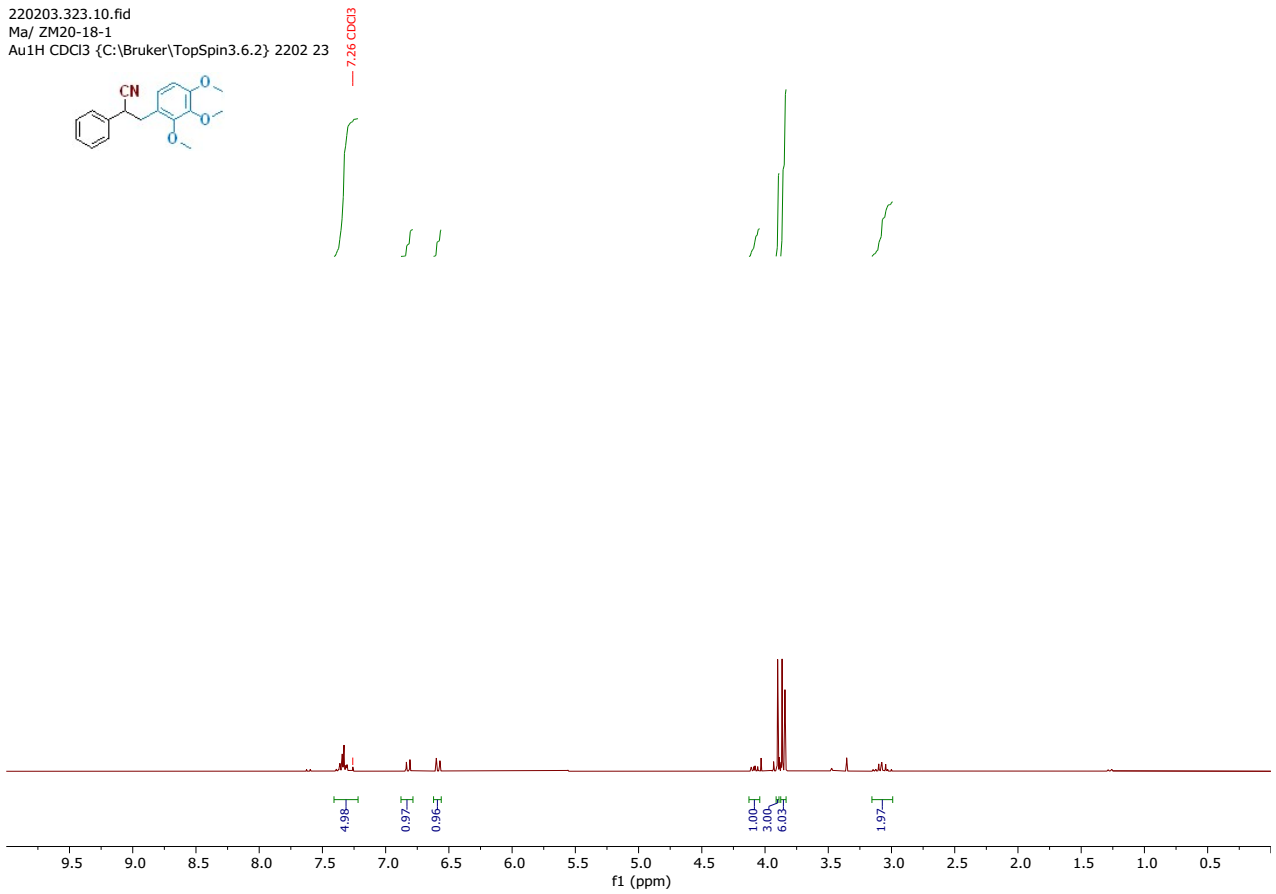

220203.323.11.fid  
Ma/ ZM20-18-1  
Au13C CDCl3 {C:\Bruker\TopSpin3.6.2} 2202 23

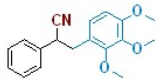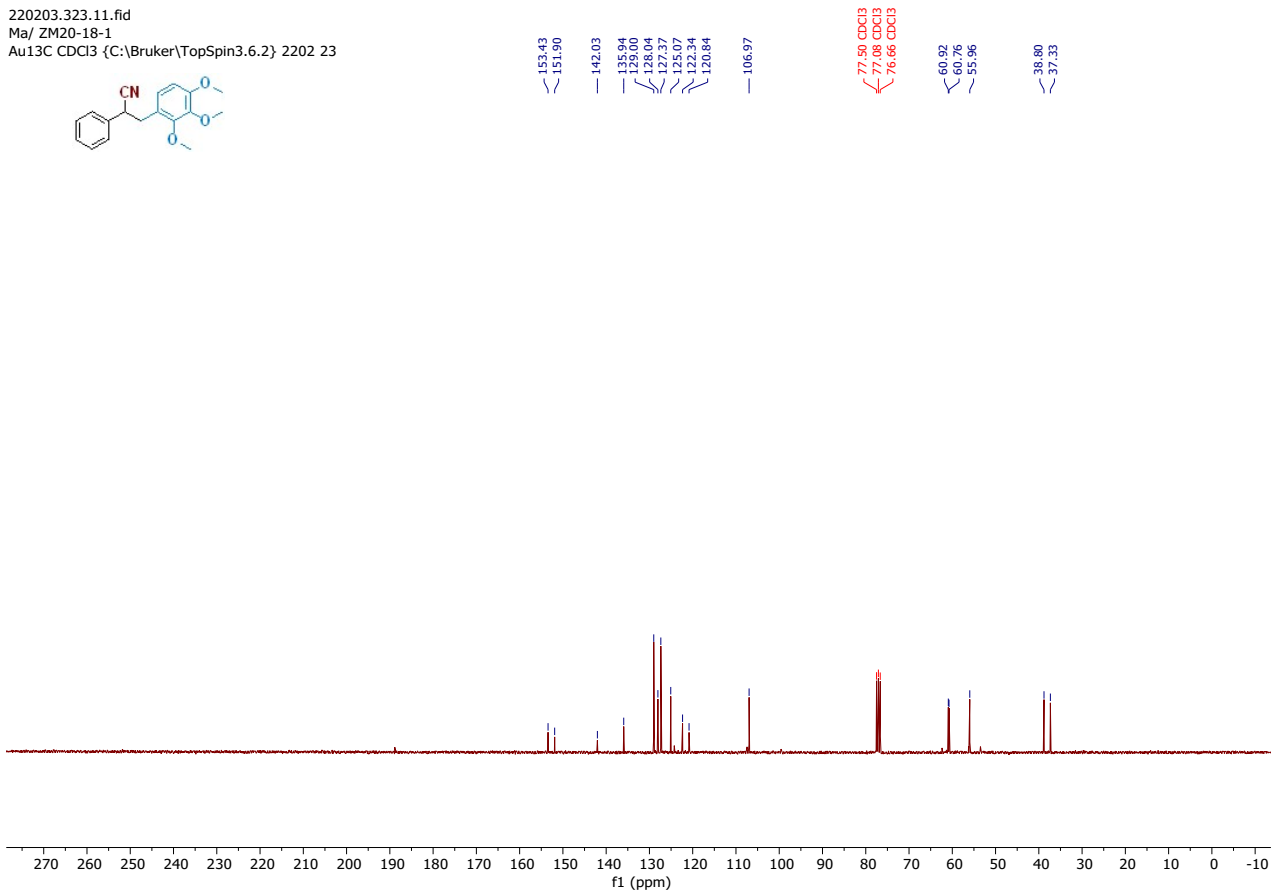

200928.f346.10.fid  
Zhuang Ma\_ZM20-13  
PROTON CDCl3 {C:\Bruker\TopSpin3.6.0} 2009 46

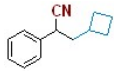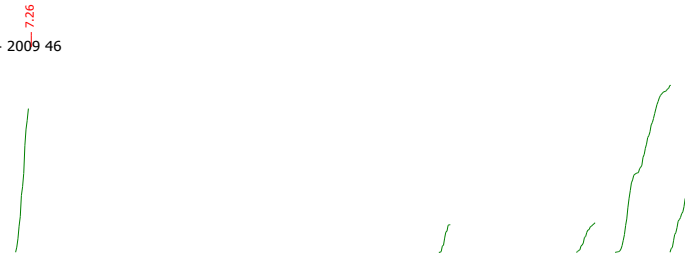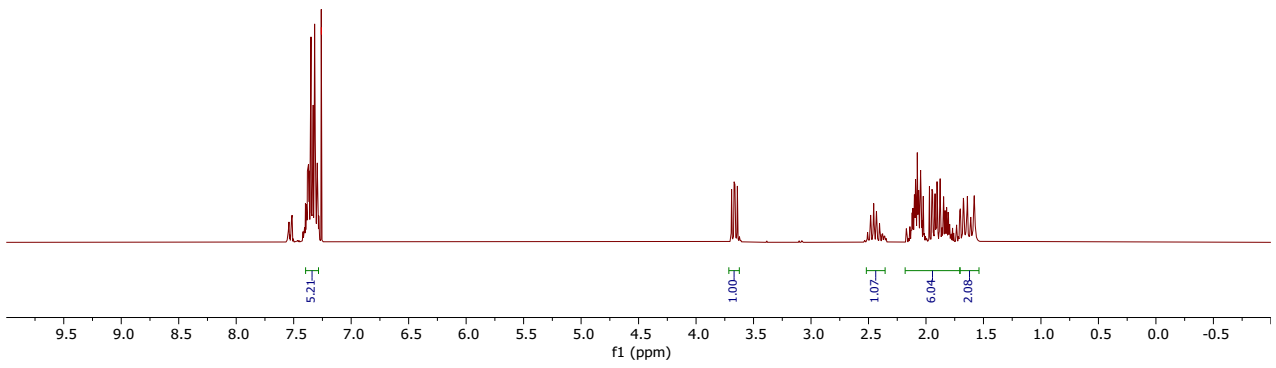

200928.f346.11.fid  
Zhuang Ma\_ZM20-13  
C13CPD CDCl3 {C:\Bruker\TopSpin3.6.0} 2009 46

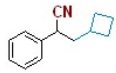

136.03  
129.04  
127.25  
125.64  
121.00  
77.45 CDCl3  
77.03 CDCl3  
76.61 CDCl3  
42.84  
35.49  
33.59  
28.01  
18.44

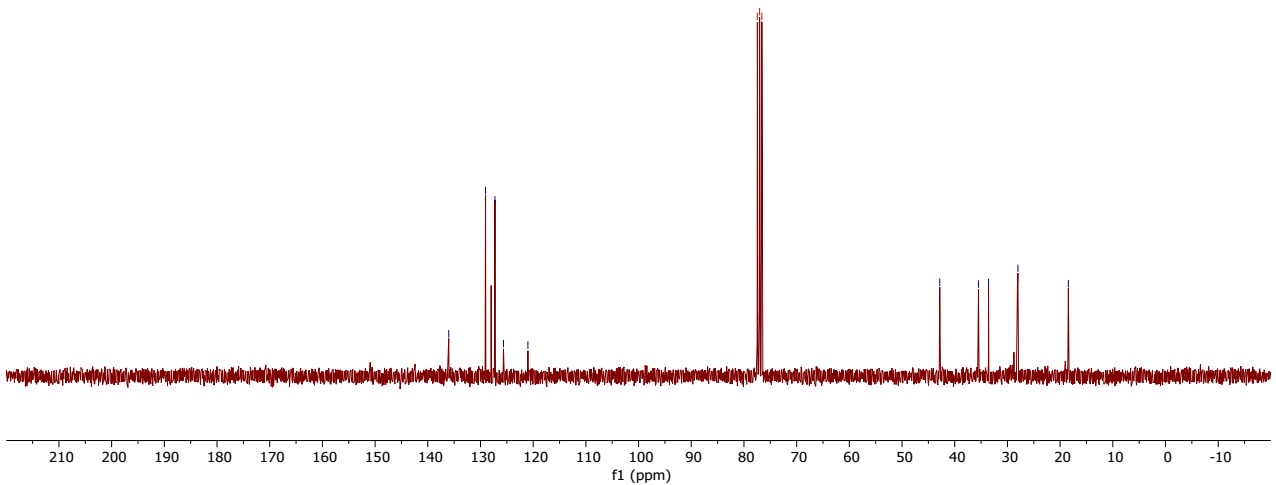

200917.301.10.fid  
Zhuang Ma\_ZM 20-10  
Au1H CDCl3 {C:\Bruker\TopSpin3.6.0} 2009 1

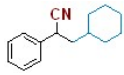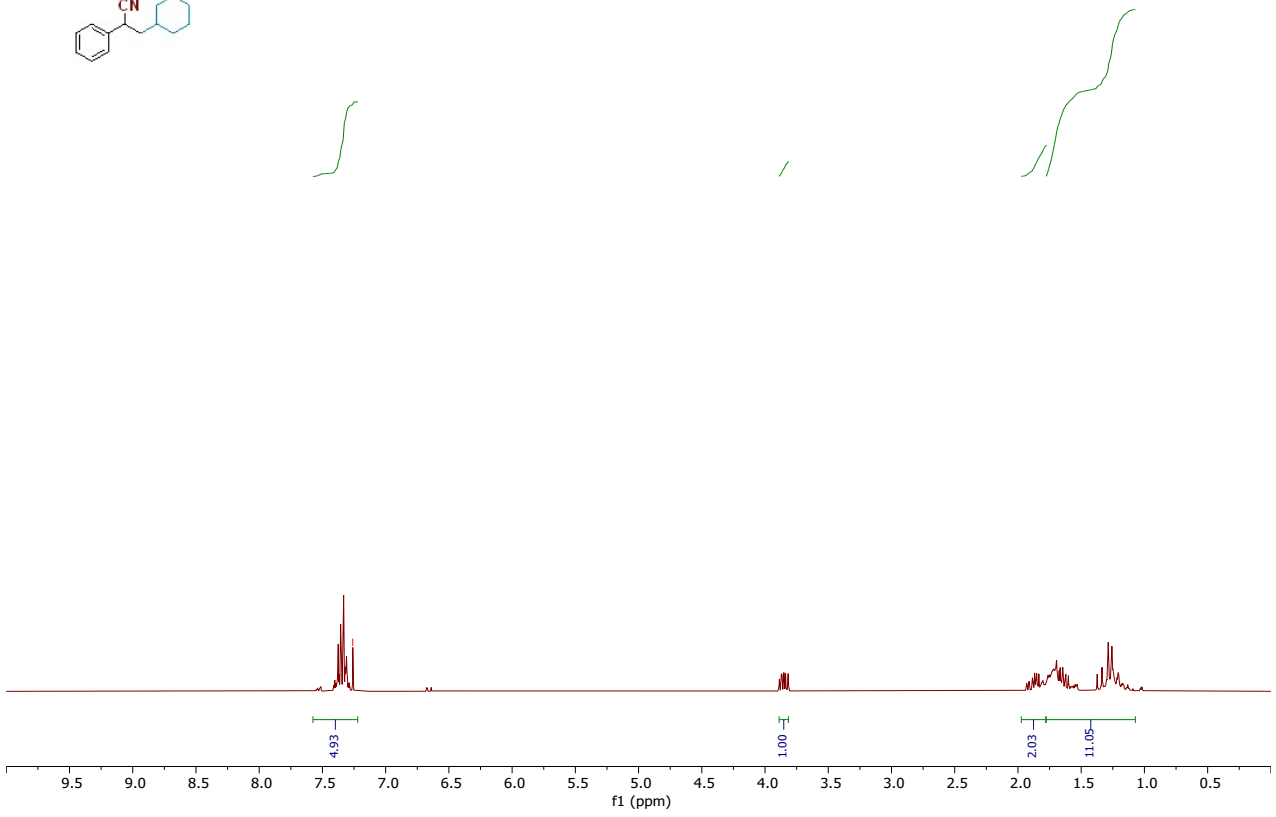

200917.301.11.fid  
Zhuang Ma\_ZM 20-10  
Au13C CDCl3 {C:\Bruker\TopSpin3.6.0} 2009 1

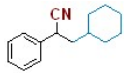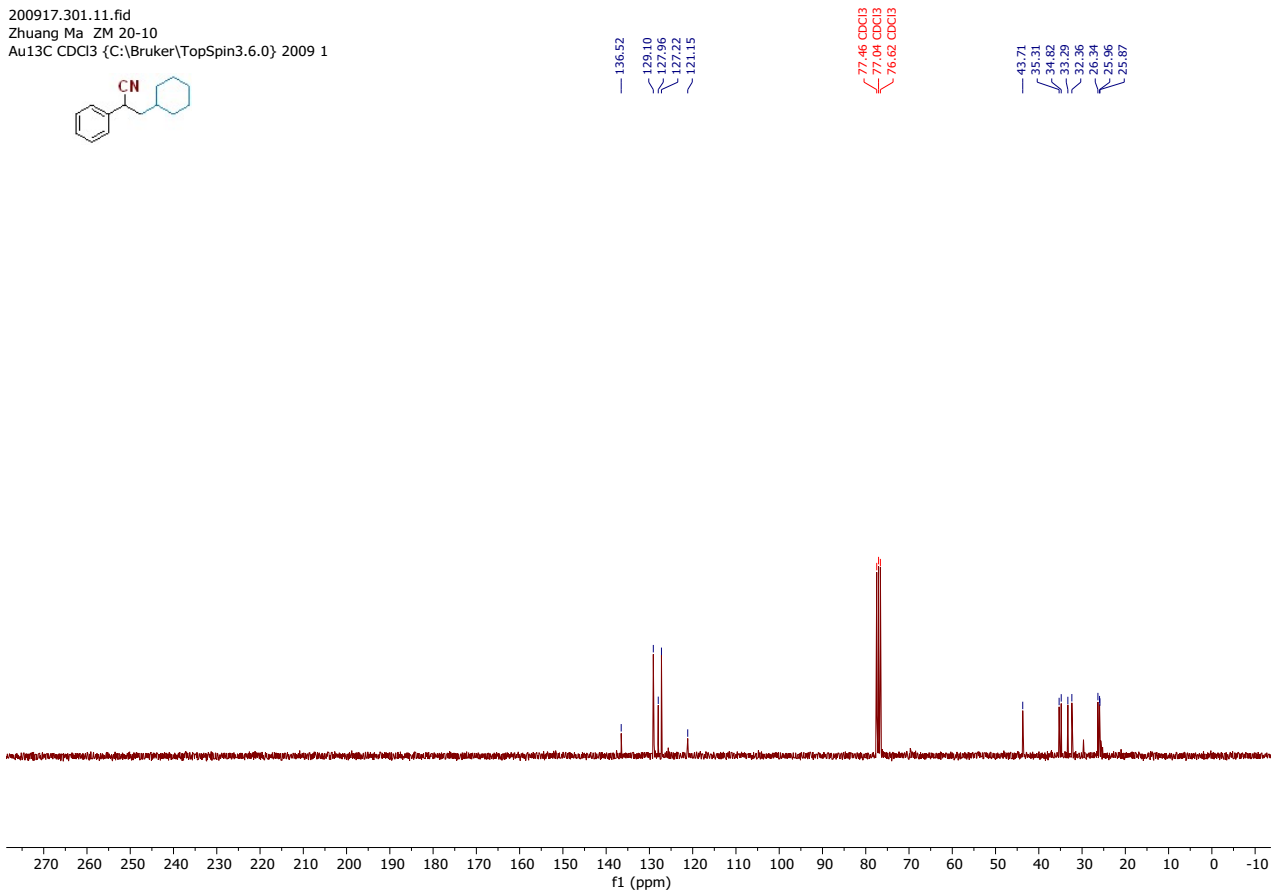

210507.333.10.fid  
Zhuang Ma ZM20-35  
Au1H CDCl3 {C:\Bruker\TopSpin3.6.2} 2105 33

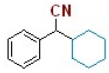

7.25 CDCl3

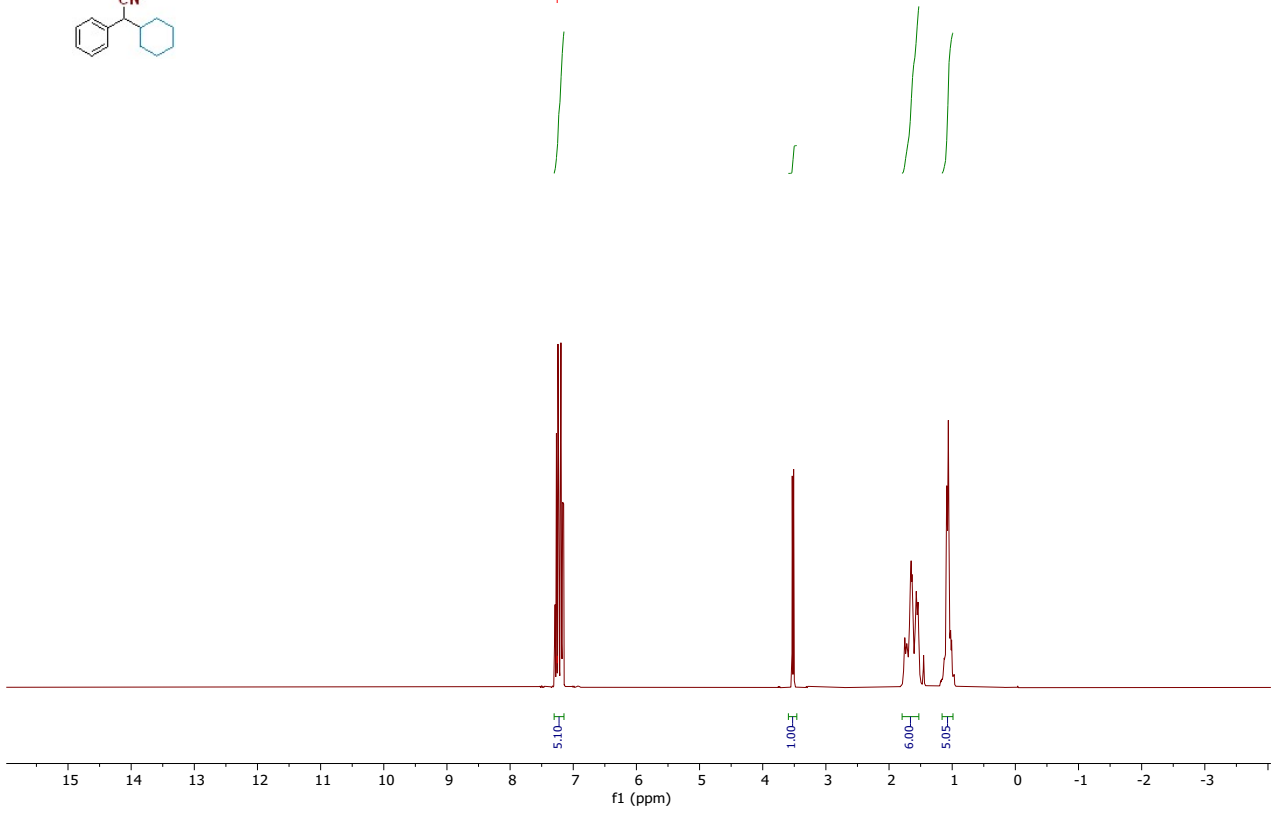

210507.333.11.fid  
Zhuang Ma ZM20-35  
Au13C CDCl3 {C:\Bruker\TopSpin3.6.2} 2105 33

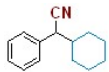

134.70  
128.80  
127.99  
127.91  
120.15

77.46 CDCl3  
77.04 CDCl3  
76.61 CDCl3

44.36  
42.76  
31.24  
29.58  
25.95  
25.85  
25.80

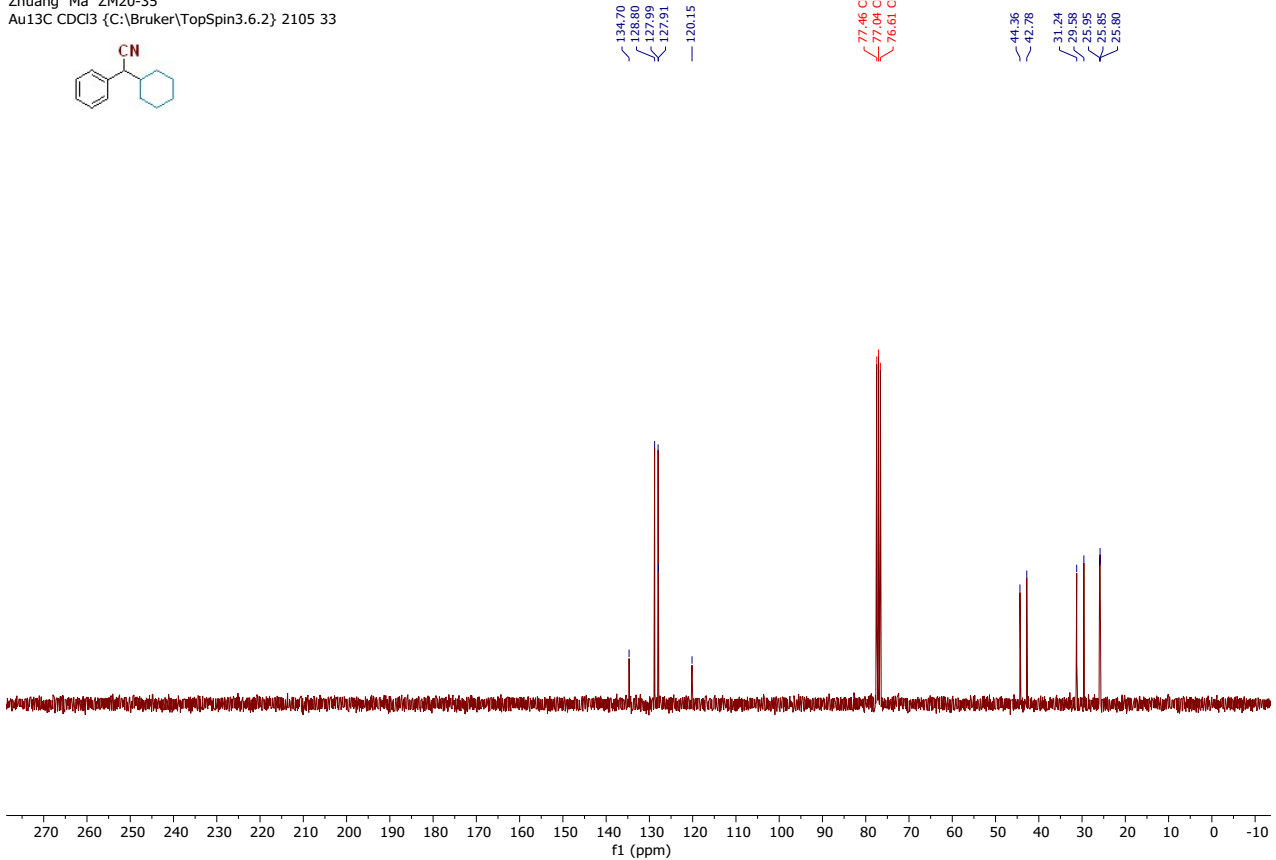

210727.321.10.fid  
Zhuang Ma\_ZM 20-24  
Au1H CDCl3 {C:\Bruker\TopSpin3.6.2} 2107 21

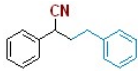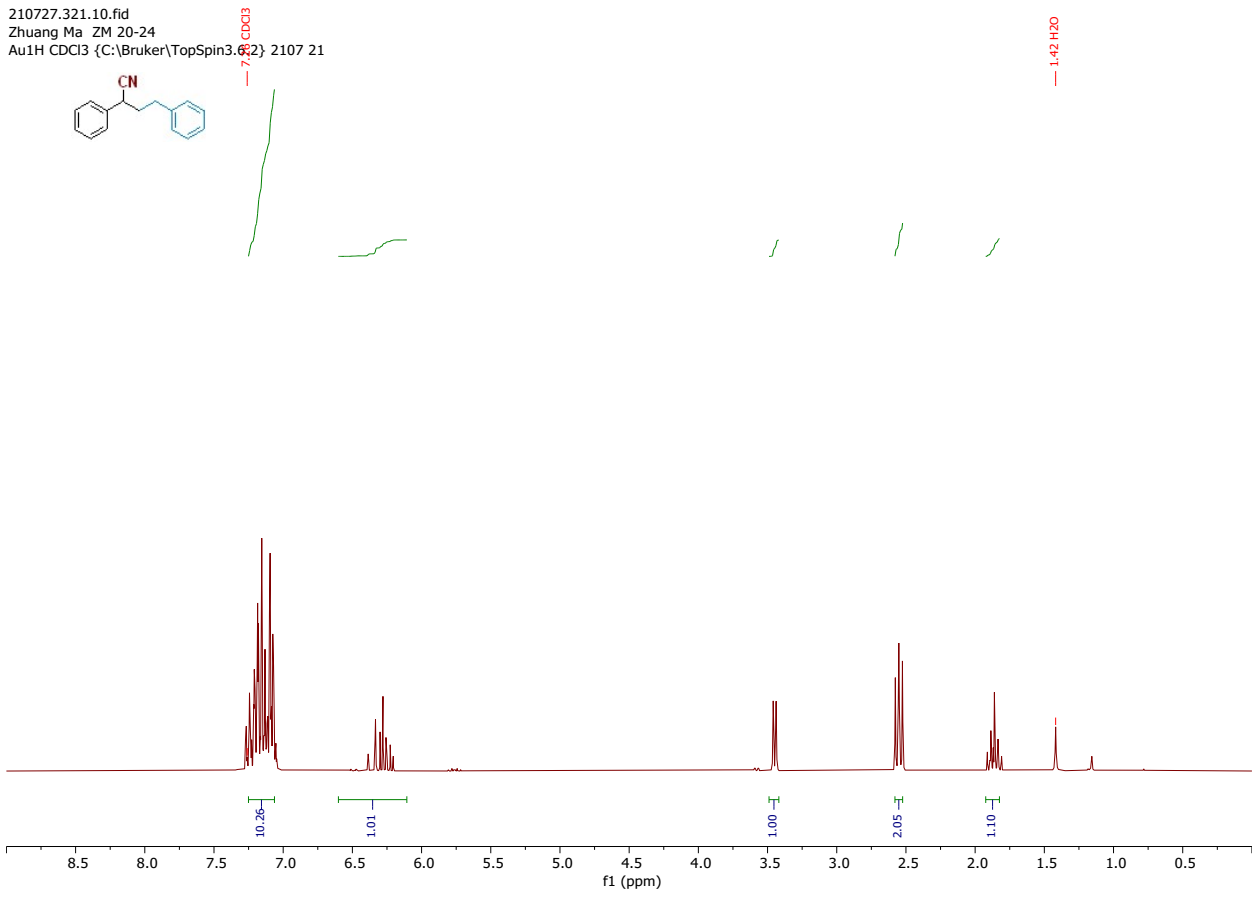

210727.321.11.fid  
Zhuang Ma\_ZM 20-24  
Au13C CDCl3 {C:\Bruker\TopSpin3.6.2} 2107 21

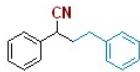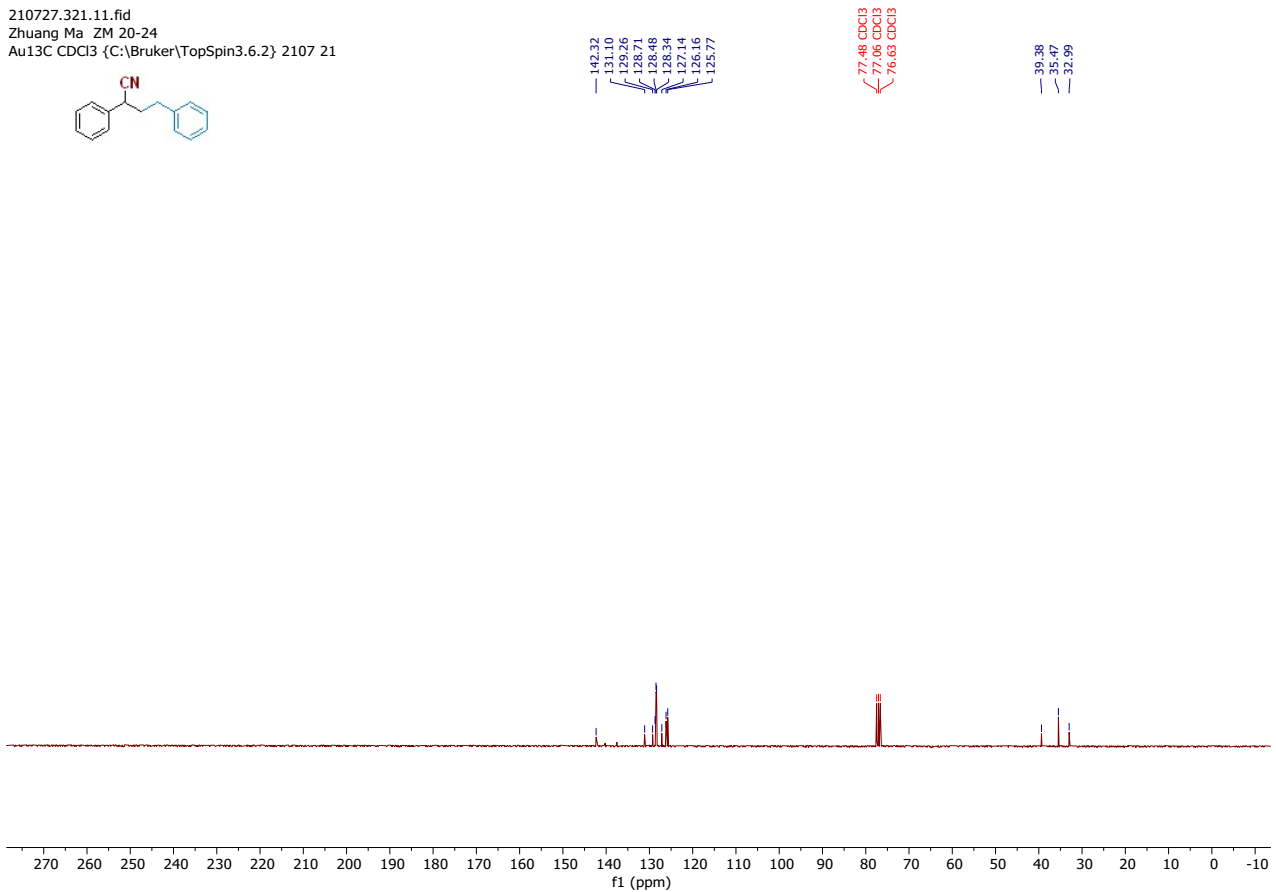



210802.f322.10.fid  
Zhuang Ma ZM 20-28  
PROTON CDCl3 {C:\Bruker\TopSpin3.6.2} 2108 22

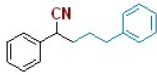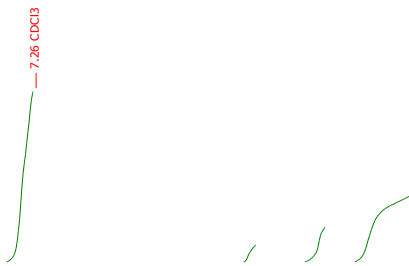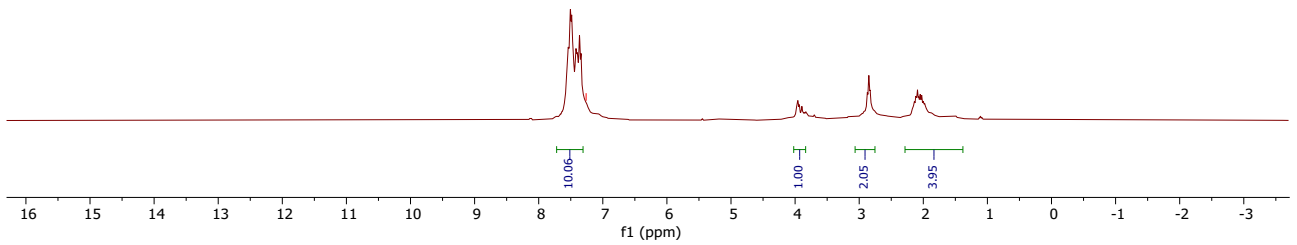

210802.f322.11.fid  
Zhuang Ma ZM 20-28  
C13CPD CDCl3 {C:\Bruker\TopSpin3.6.2} 2108 22

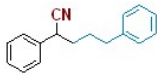

141.25  
135.87  
129.17  
128.56  
128.46  
128.15  
127.33  
126.17  
120.87

77.63 CDCl3  
77.21 CDCl3  
76.78 CDCl3

37.32  
35.29  
35.18  
28.64

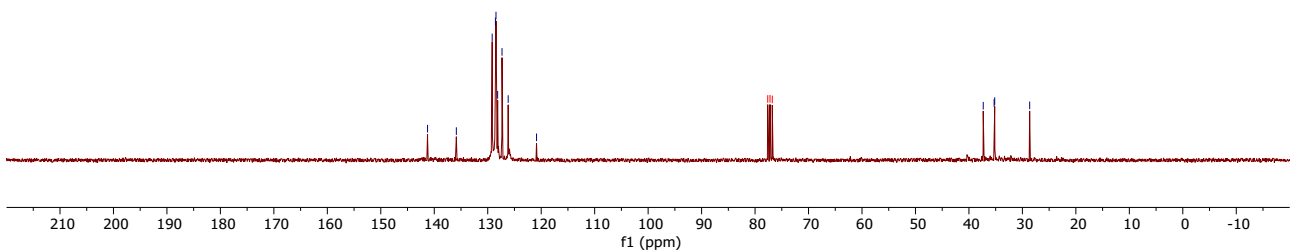

210426.407.10.fid  
Zhuang Ma\_ZM20-34  
Au1H CDCl3 {C:\Bruker\TopSpin3.5pl6} 2104

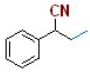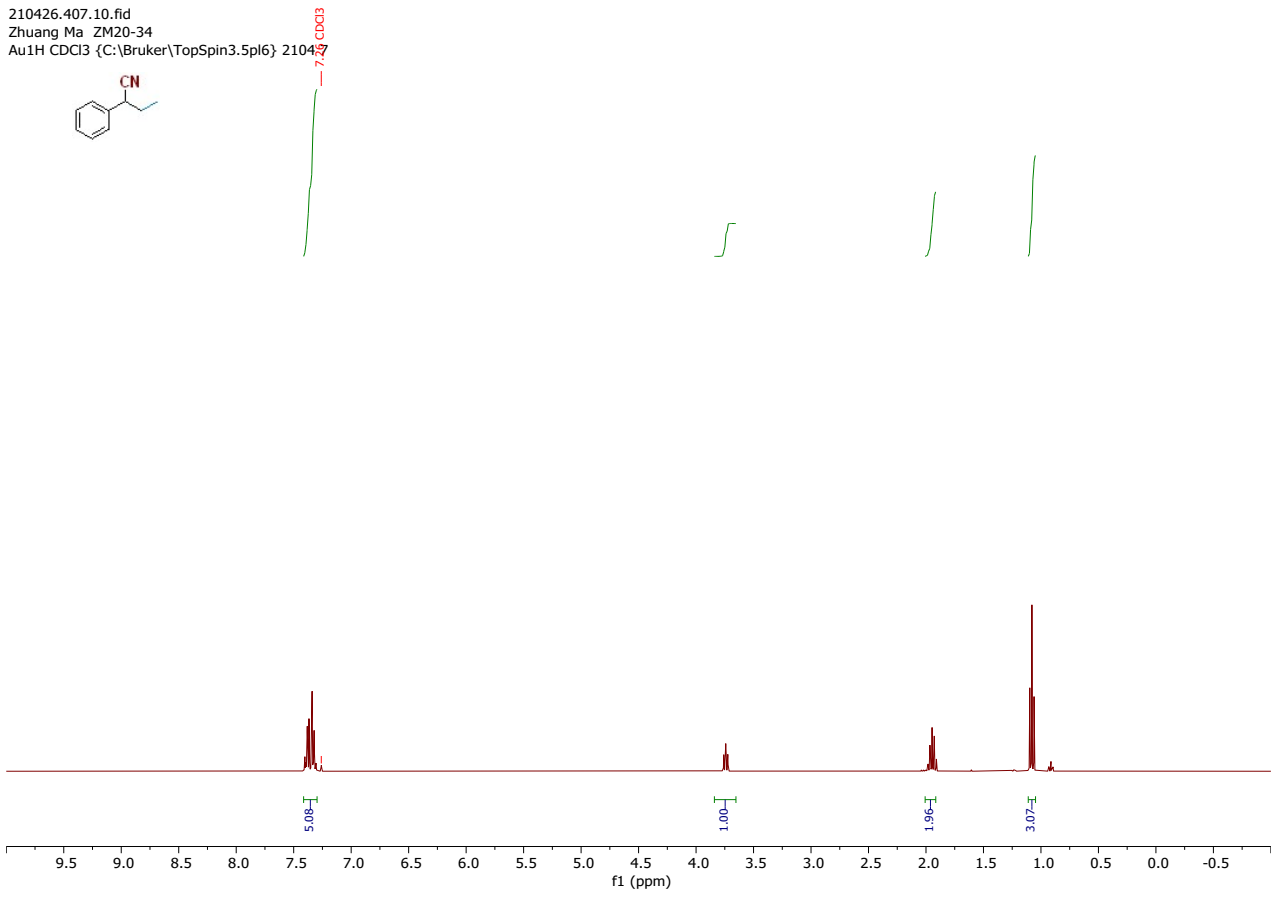

210426.407.11.fid  
Zhuang Ma\_ZM20-34  
Au13C CDCl3 {C:\Bruker\TopSpin3.5pl6} 2104 7

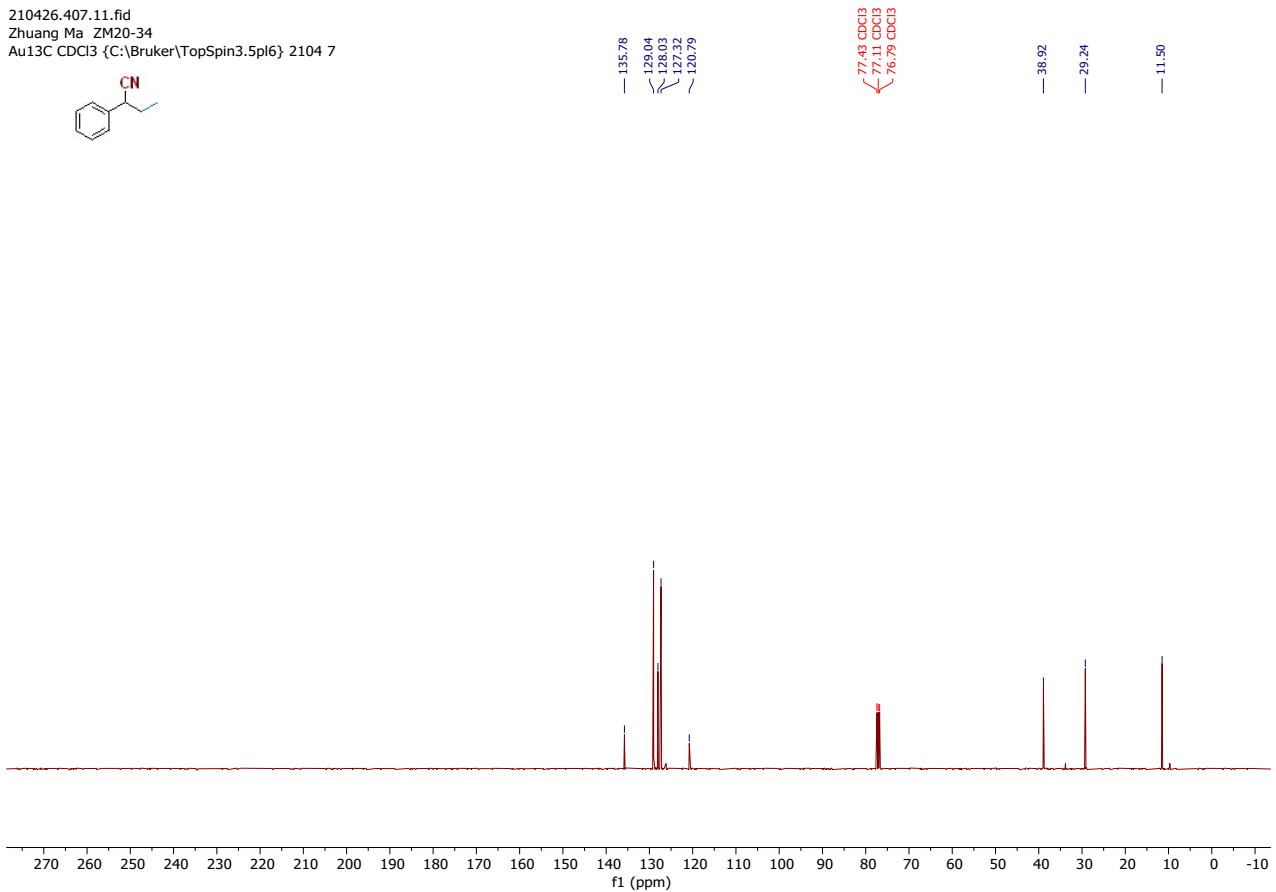

220131.306.10.fid  
Ma/ ZM-20-25  
Au1H CDCl3 {C:\Bruker\TopSpin3.6.2} 2201 6

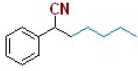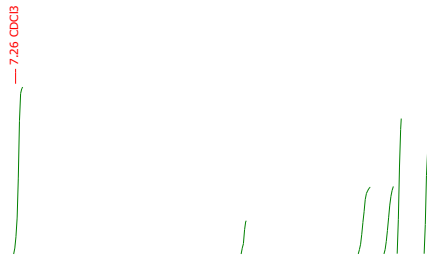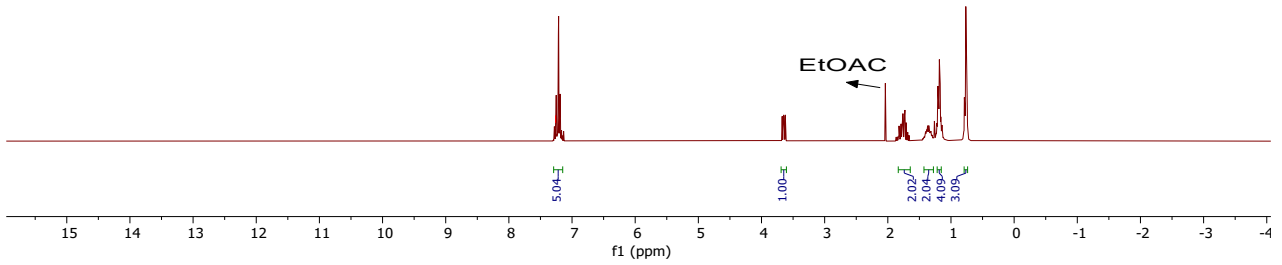

220131.306.11.fid  
Ma/ ZM-20-25  
Au13C CDCl3 {C:\Bruker\TopSpin3.6.2} 2201 6

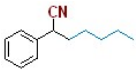

136.13  
129.05  
127.99  
127.25  
120.97  
77.54 CDCl3  
77.12 CDCl3  
76.69 CDCl3  
37.42  
35.91  
31.12  
26.73  
22.37  
13.96

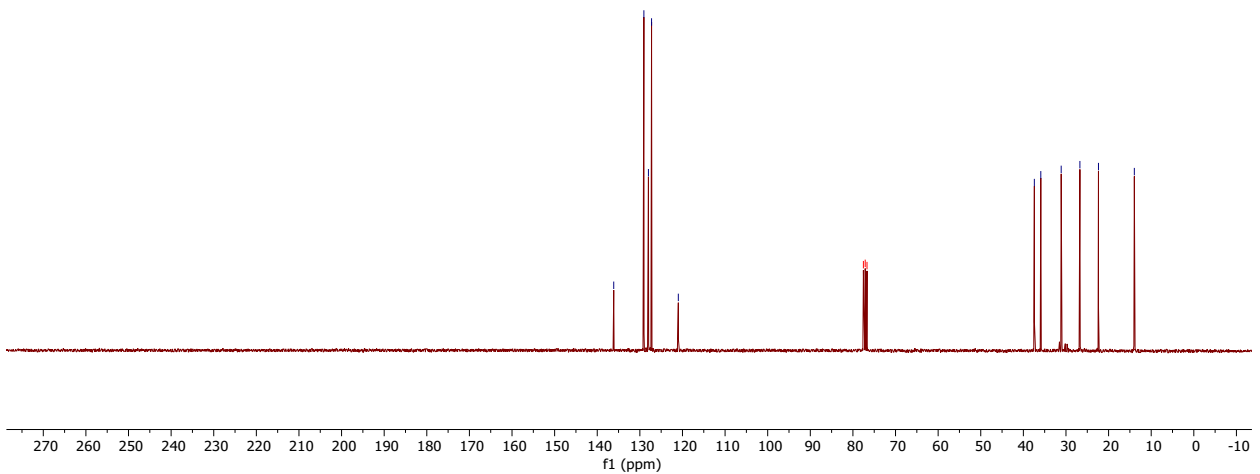

220131.308.10.fid  
Ma/ ZM-20-45  
Au1H CDCl3 {C:\Bruker\TopSpin3.6.2} 2201 8

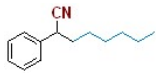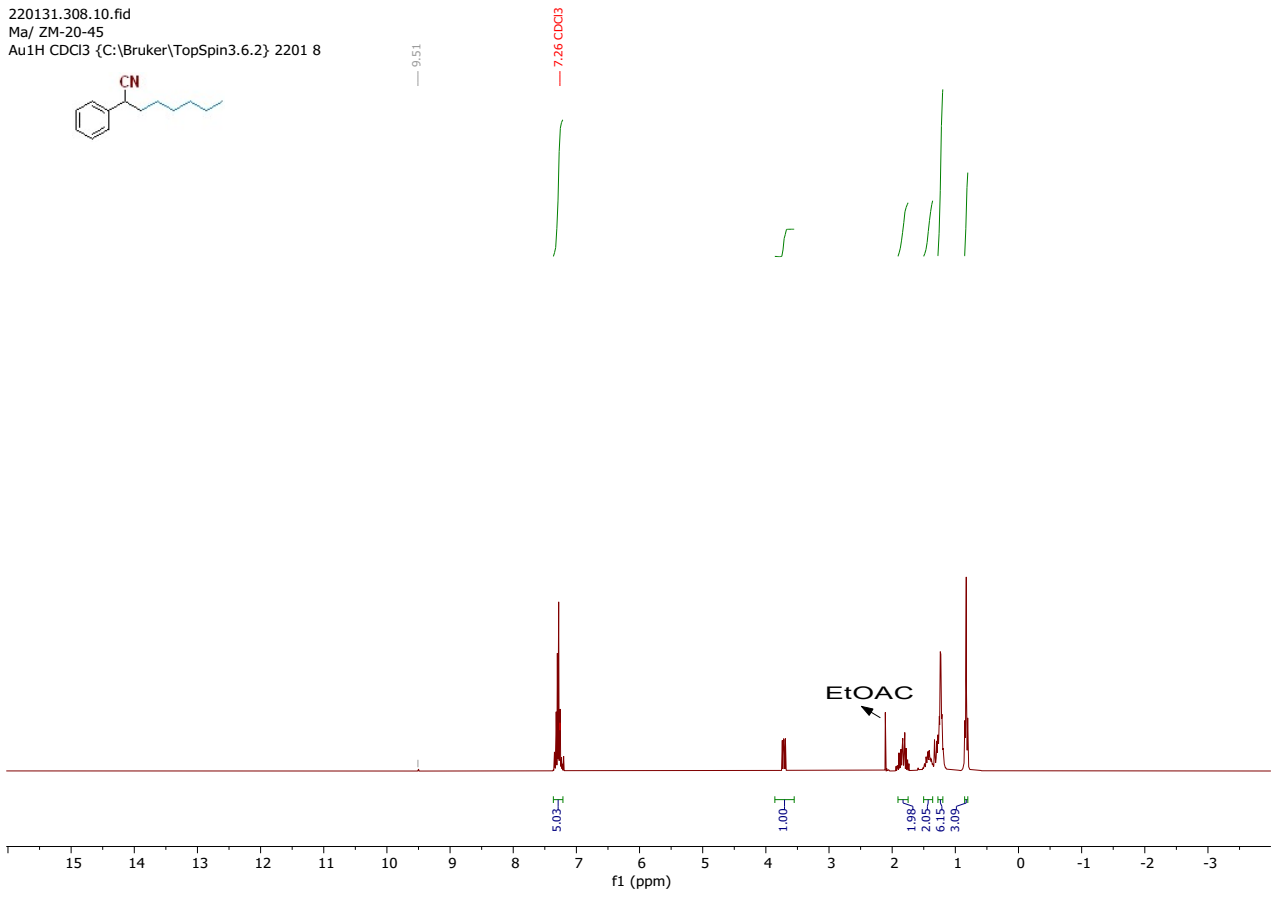

220131.308.11.fid  
Ma/ ZM-20-45  
Au13C CDCl3 {C:\Bruker\TopSpin3.6.2} 2201 8

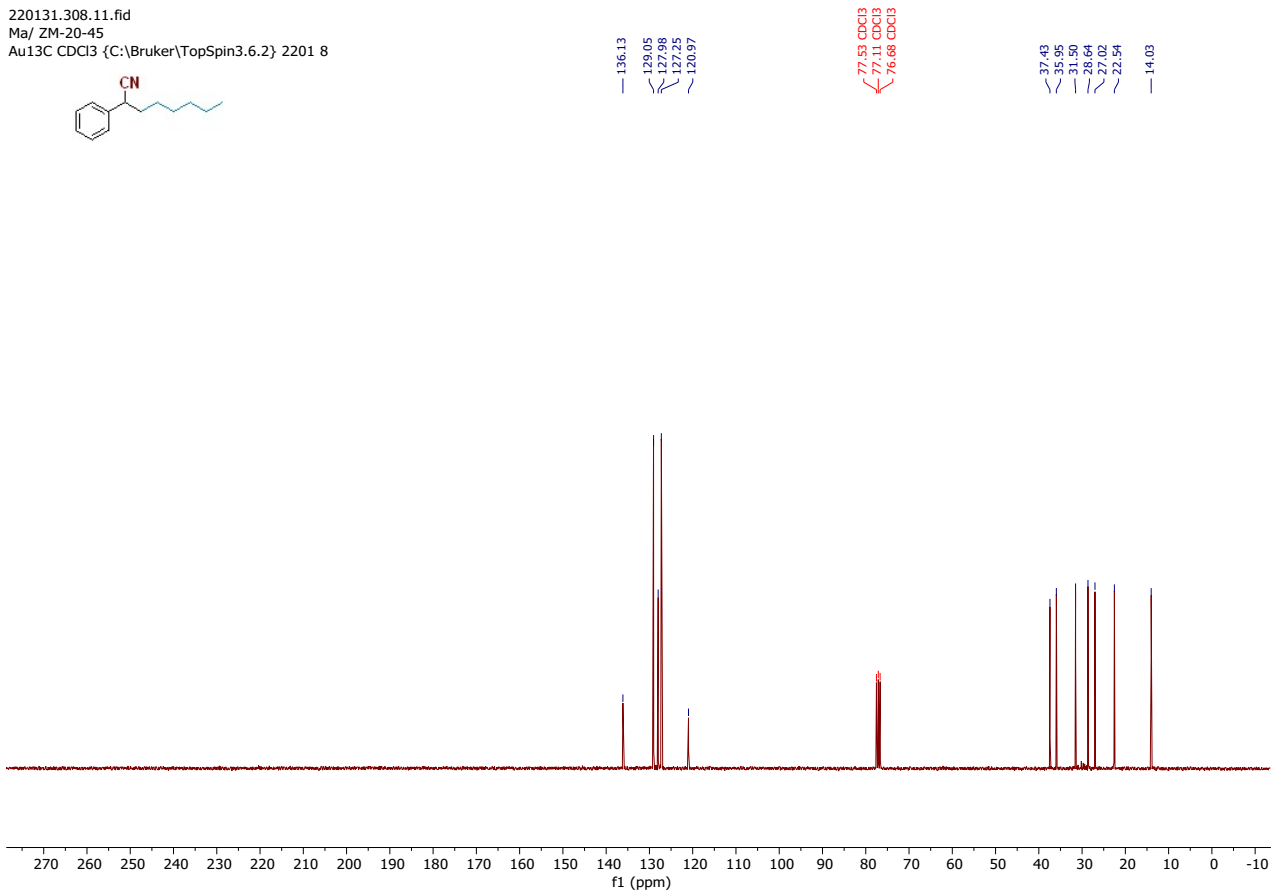

220304.f343.10.fid  
Zhuang Ma ZM20-204  
PROTON CDCl3 {C:\Bruker\TopSpin3.6.2} 2203 43

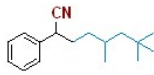

7.26 CDCl3

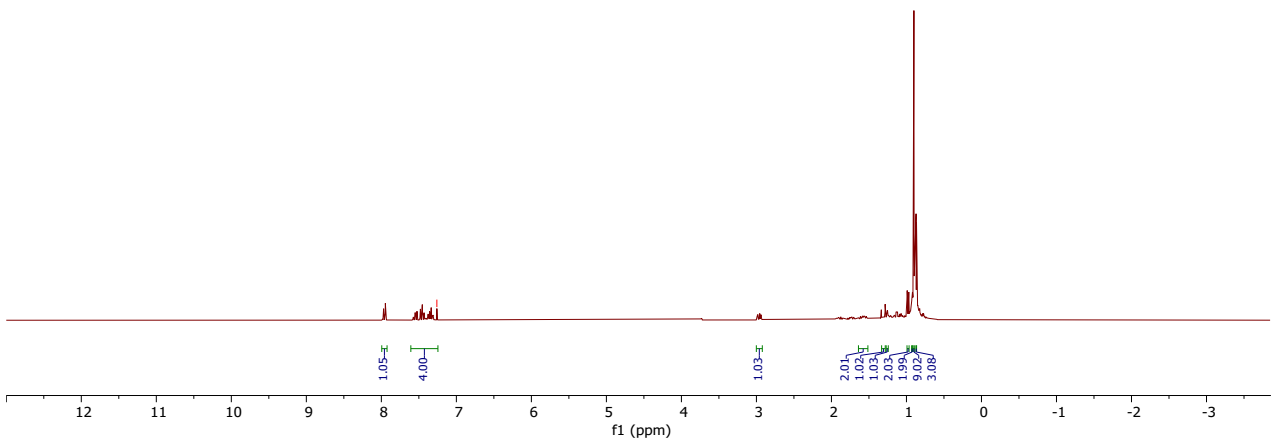

220304.f343.11.fid  
Zhuang Ma ZM20-204  
C13CPD CDCl3 {C:\Bruker\TopSpin3.6.2} 2203 43

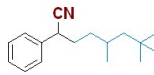

132.85  
129.05  
128.56  
128.05  
127.23

77.47 CDCl3  
77.04 CDCl3  
76.62 CDCl3

51.04

36.52  
33.69  
31.09  
30.07  
30.00  
29.04  
22.53

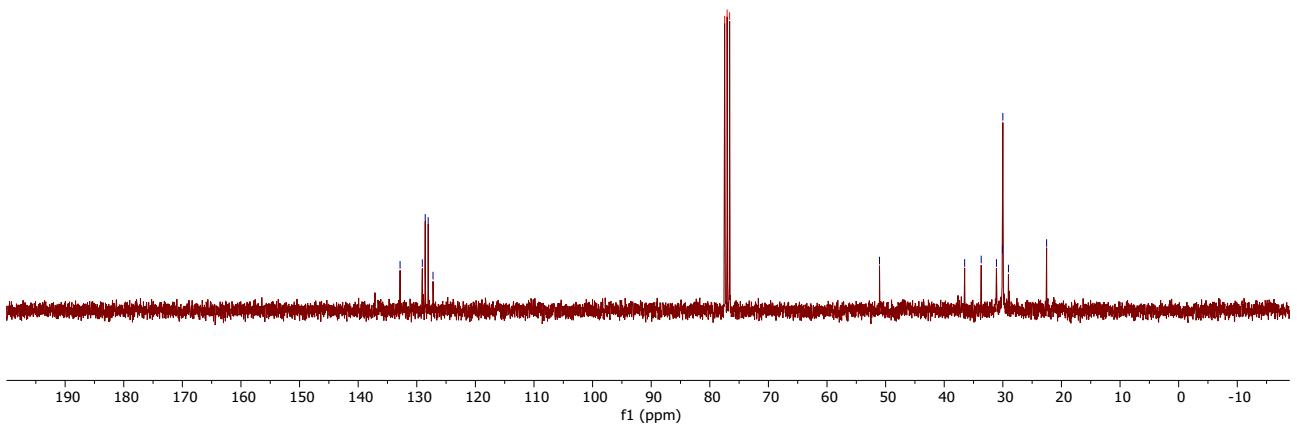

210727.319.10.fid  
Zhuang Ma ZM 20-26  
Au1H CDCl3 {C:\Bruker\TopSpin3.6.2} 2107 19

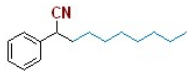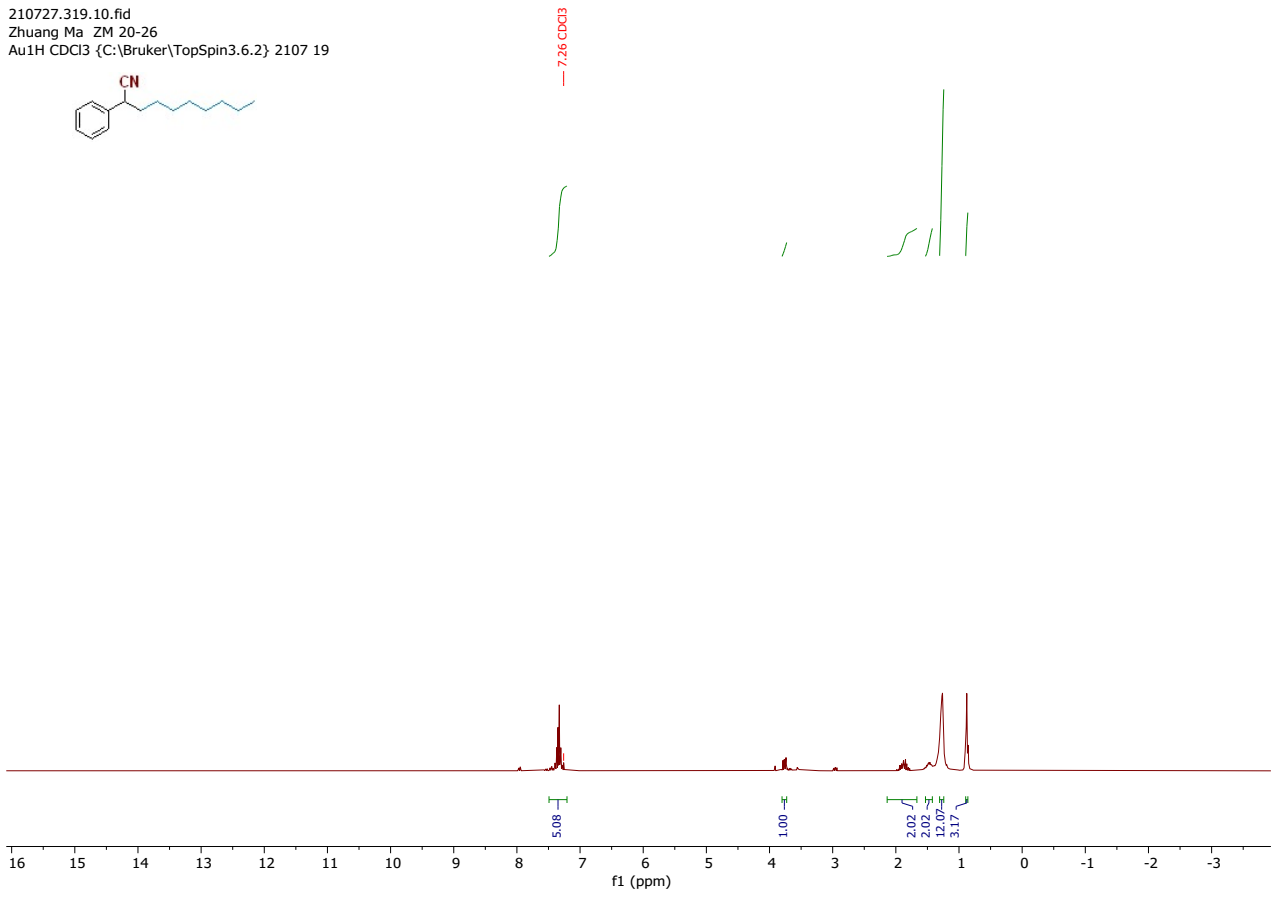

210727.319.11.fid  
Zhuang Ma ZM 20-26  
Au13C CDCl3 {C:\Bruker\TopSpin3.6.2} 2107 19

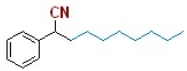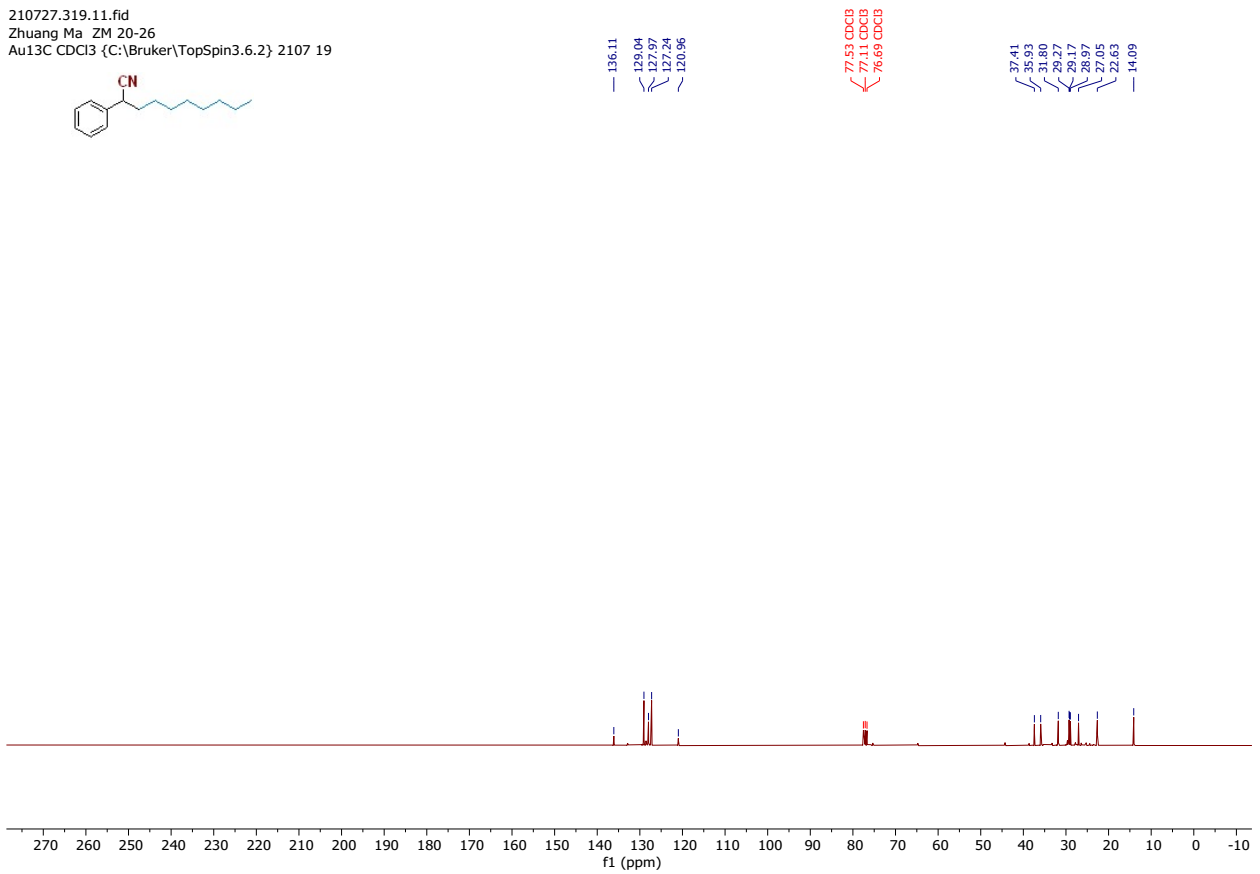

210721.309.10.fid  
Zhuang Ma ZM 20-27  
Au1H CDCl3 {C:\Bruker\TopSpin3.6.2} 2107 9

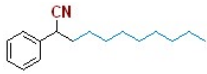

77.10 CDCl3

1.98 H2O

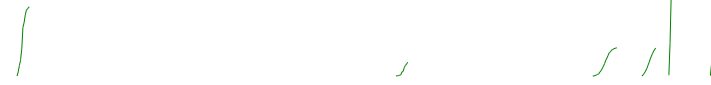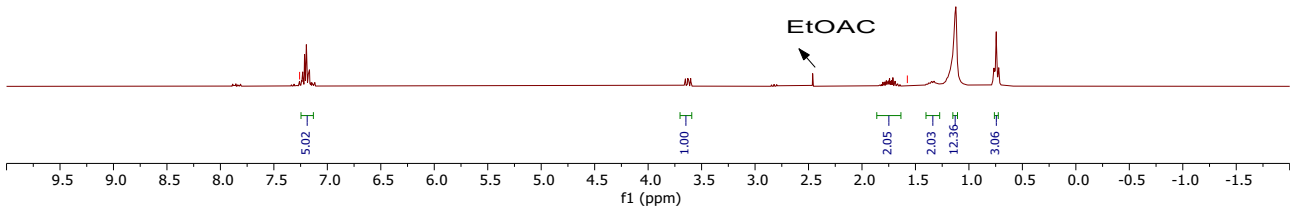

210721.309.11.fid  
Zhuang Ma ZM 20-27  
Au13C CDCl3 {C:\Bruker\TopSpin3.6.2} 2107 9

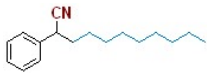

136.13  
129.04  
127.97  
127.24  
120.95

77.53 CDCl3  
77.10 CDCl3  
76.68 CDCl3

37.42  
35.95  
31.86  
29.77  
29.32  
29.26  
28.97  
27.06  
22.68  
14.12

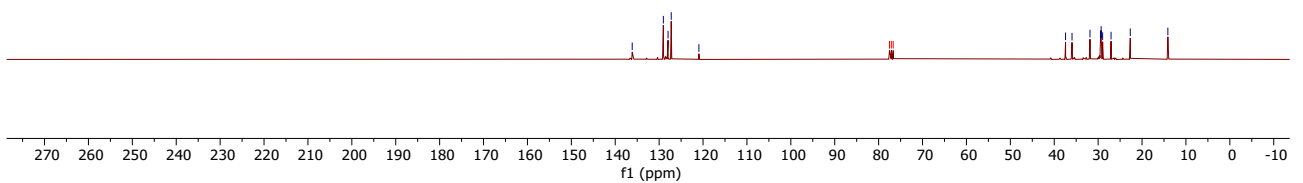

220121.315.10.fid  
Zhuang Ma ZM20-43  
Au1H CDCl3 {C:\Bruker\TopSpin3.6.2} 2201 15

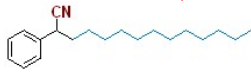

77.00 CDCl3

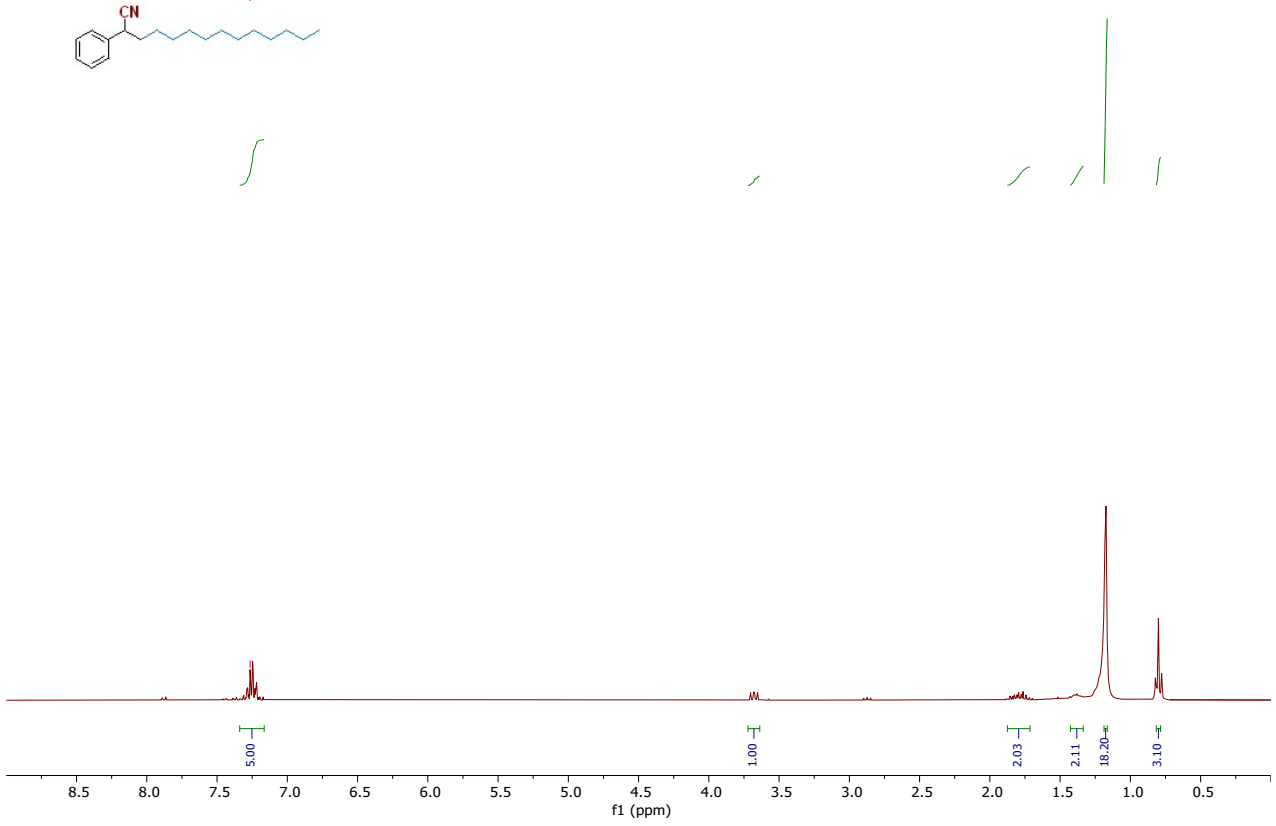

220121.315.11.fid  
Zhuang Ma ZM20-43  
Au13C CDCl3 {C:\Bruker\TopSpin3.6.2} 2201 15

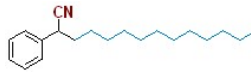

136.14  
129.03  
127.96  
127.24  
120.92

77.51 CDCl3  
77.09 CDCl3  
76.66 CDCl3

37.42  
35.96  
31.94  
29.65  
29.61  
29.52  
29.38  
29.32  
28.98  
27.07  
22.72  
14.14

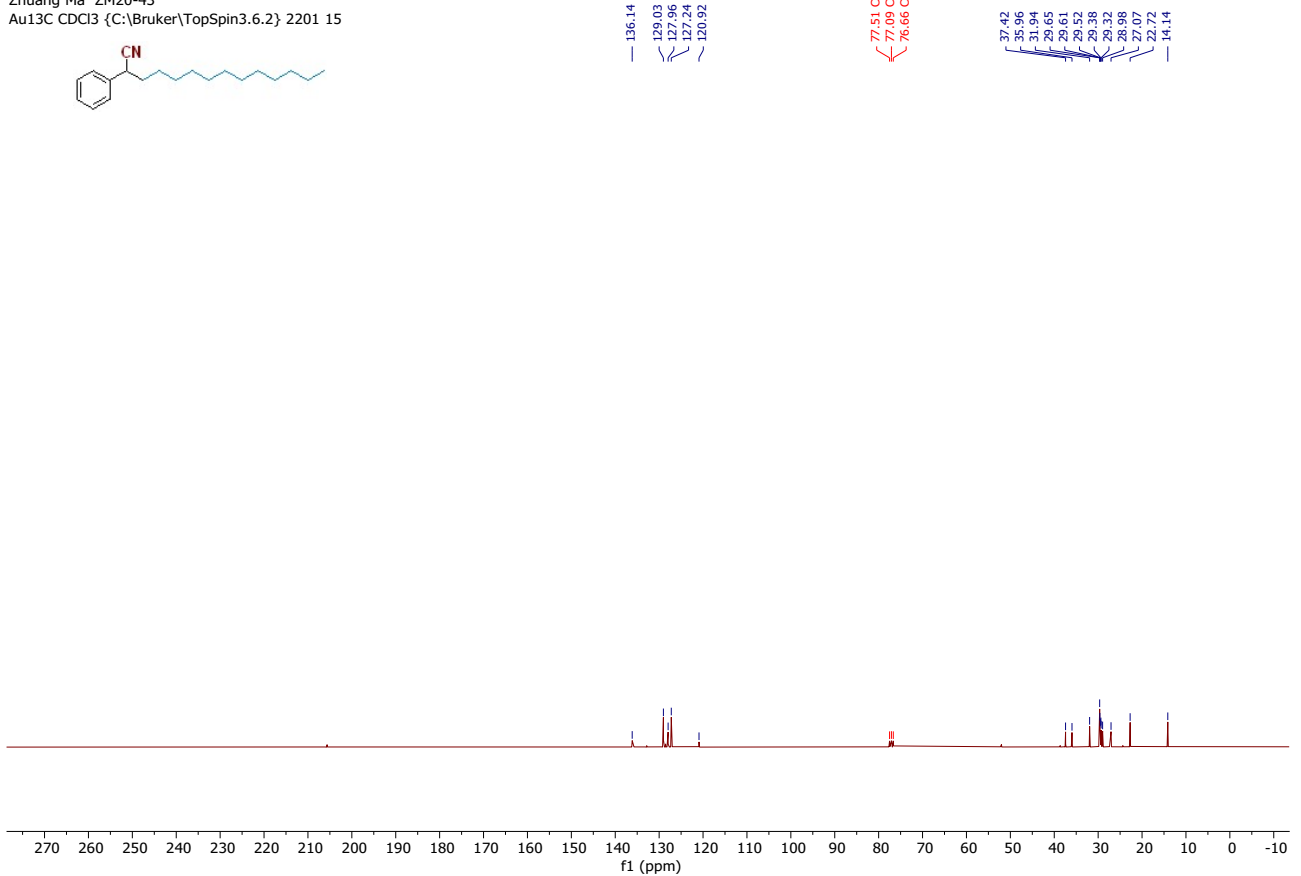



220210.3024.10.fid  
Ma/ ZM20-116-1  
Au1H CDCl3 {C:\Bruker\TopSpin3.6.2} 2202 24

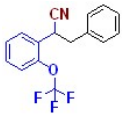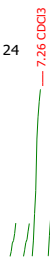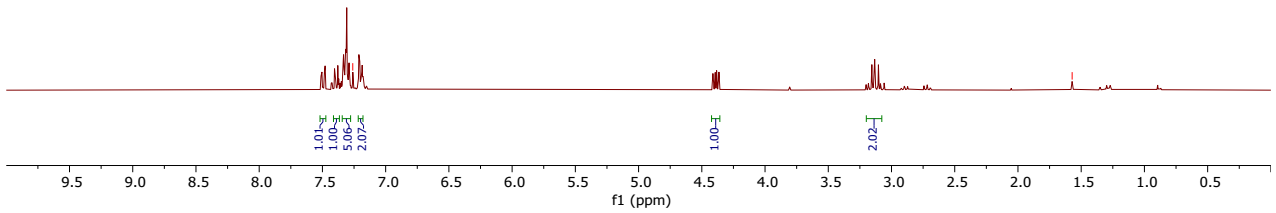

220210.3024.11.fid  
Ma/ ZM20-116-1  
Au13C CDCl3 {C:\Bruker\TopSpin3.6.2} 2202 24

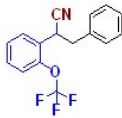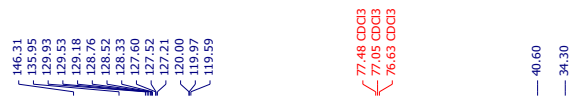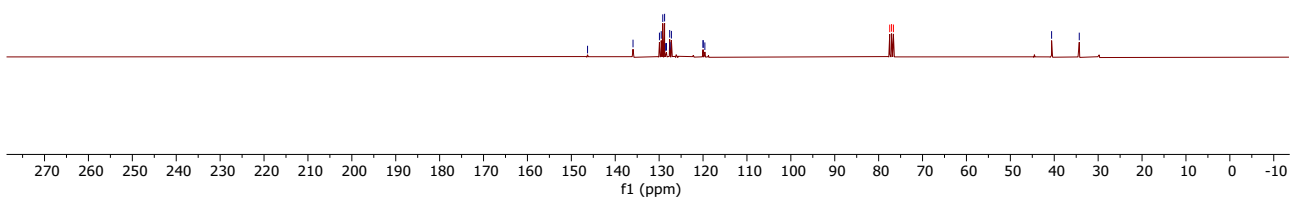

210824.312.10.fid  
Zhuang Ma ZM 20-62  
Au1H CDCl3 {C:\Bruker\TopSpin3.6.2} 2108 12

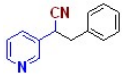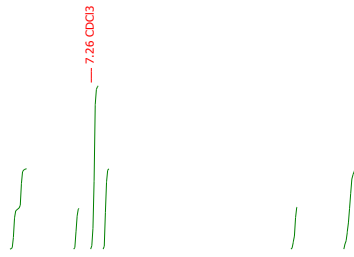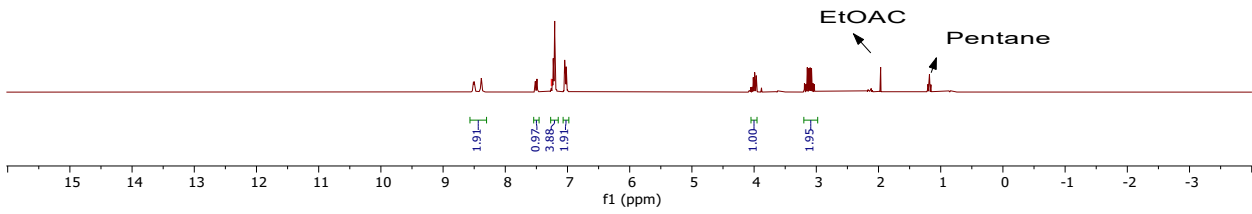

210824.312.11.fid  
Zhuang Ma ZM 20-62  
Au13C CDCl3 {C:\Bruker\TopSpin3.6.2} 2108 12

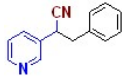

146.67  
146.85  
135.34  
135.09  
131.04  
128.26  
126.92  
123.74  
119.45  
77.53 CDCl3  
77.11 CDCl3  
76.68 CDCl3  
41.78  
37.24

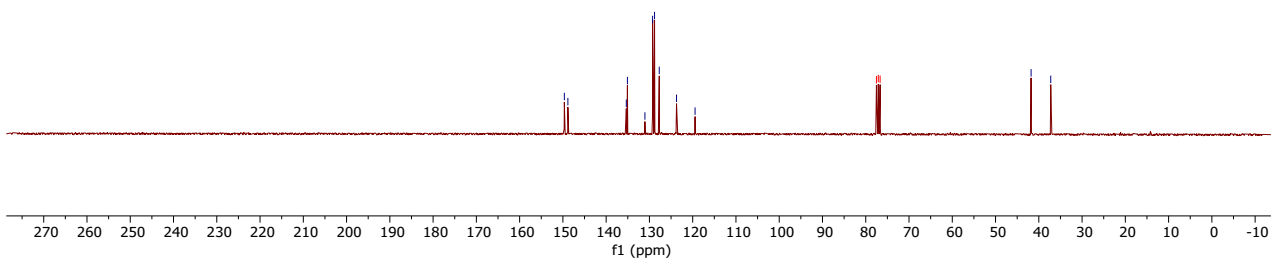

220214.312.10.fid  
Zhuang Ma ZM 20-112  
Au1H CDCl3 {C:\Bruker\TopSpin3.6.2} 2202 12

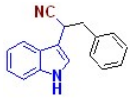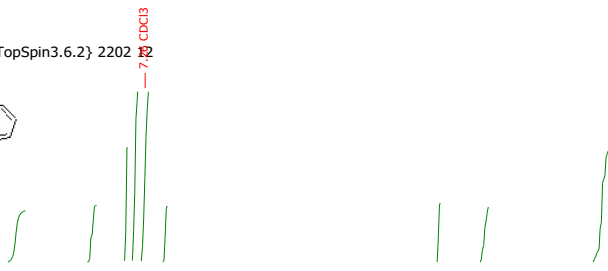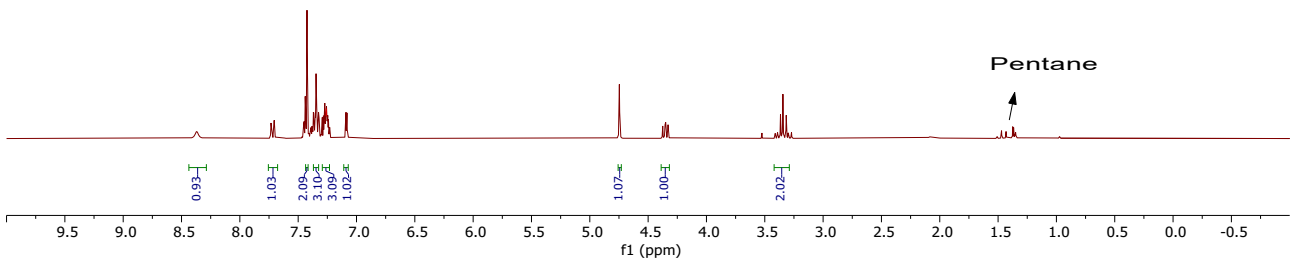

220214.312.11.fid  
Zhuang Ma ZM 20-112  
Au13C CDCl3 {C:\Bruker\TopSpin3.6.2} 2202 12

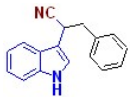

137.02  
136.49  
136.27  
136.22  
127.73  
127.34  
127.09  
125.20  
122.79  
120.23  
118.34  
111.84  
109.90  
77.58 CDCl3  
77.16 CDCl3  
76.74 CDCl3  
65.34  
40.22  
31.53

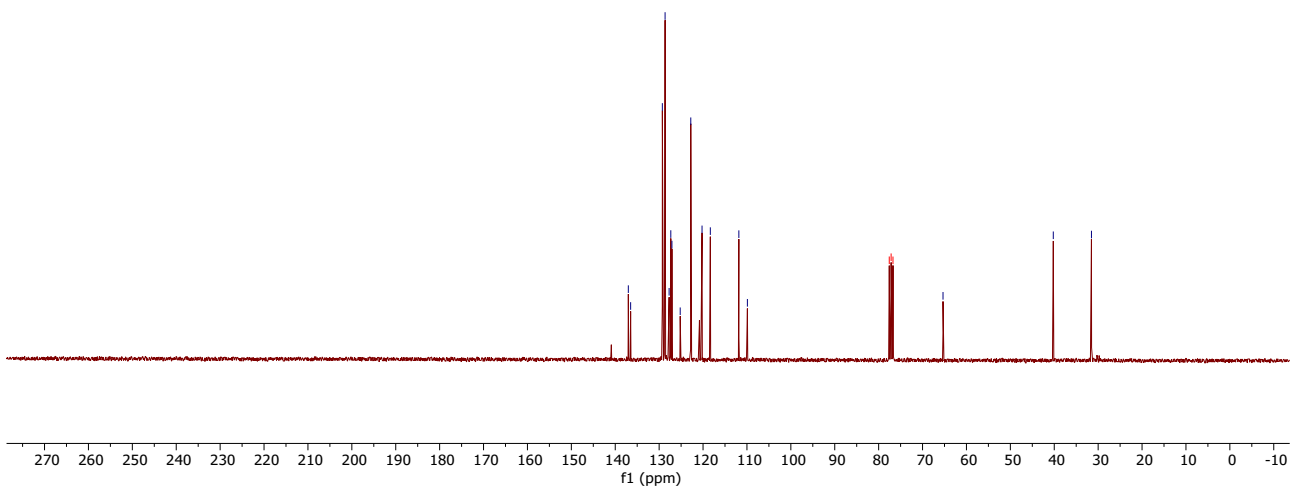

220221.305.10.fid  
Zhuang Ma ZM20-64  
Au1H CDCl3 {C:\Bruker\TopSpin3.6.2} 2202 5

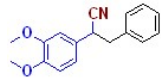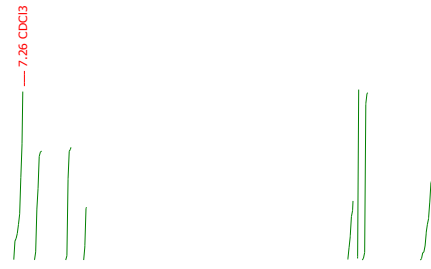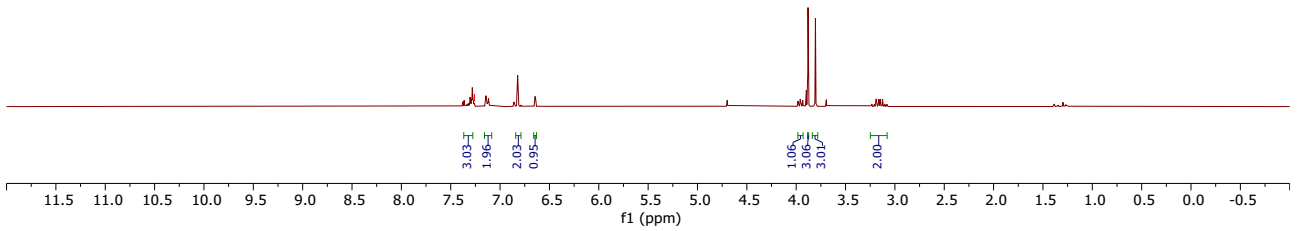

220221.305.11.fid  
Zhuang Ma ZM20-64  
Au13C CDCl3 {C:\Bruker\TopSpin3.6.2} 2202 5

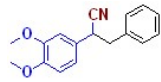

149.13  
148.87  
136.33  
128.34  
127.48  
127.35  
120.63  
119.80  
111.31  
110.61  
77.52 CDCl3  
77.10 CDCl3  
76.67 CDCl3  
55.96  
55.92  
42.24  
39.27

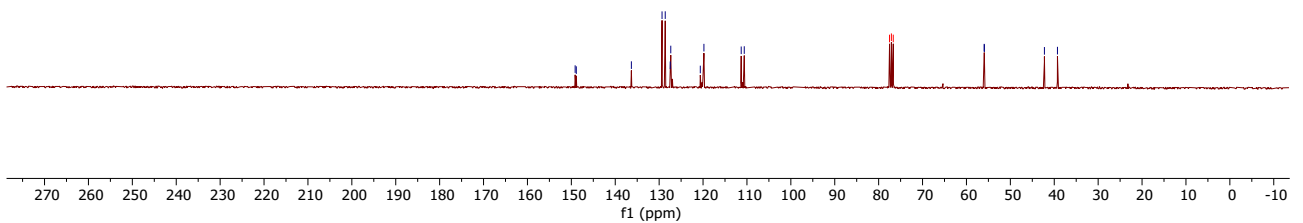

211126.404.10.fid  
Zhuang Ma\_ZM 20-36-2  
Au1H CDCl3 {C:\Bruker\TopSpin3.5pl6} 2111 4

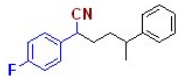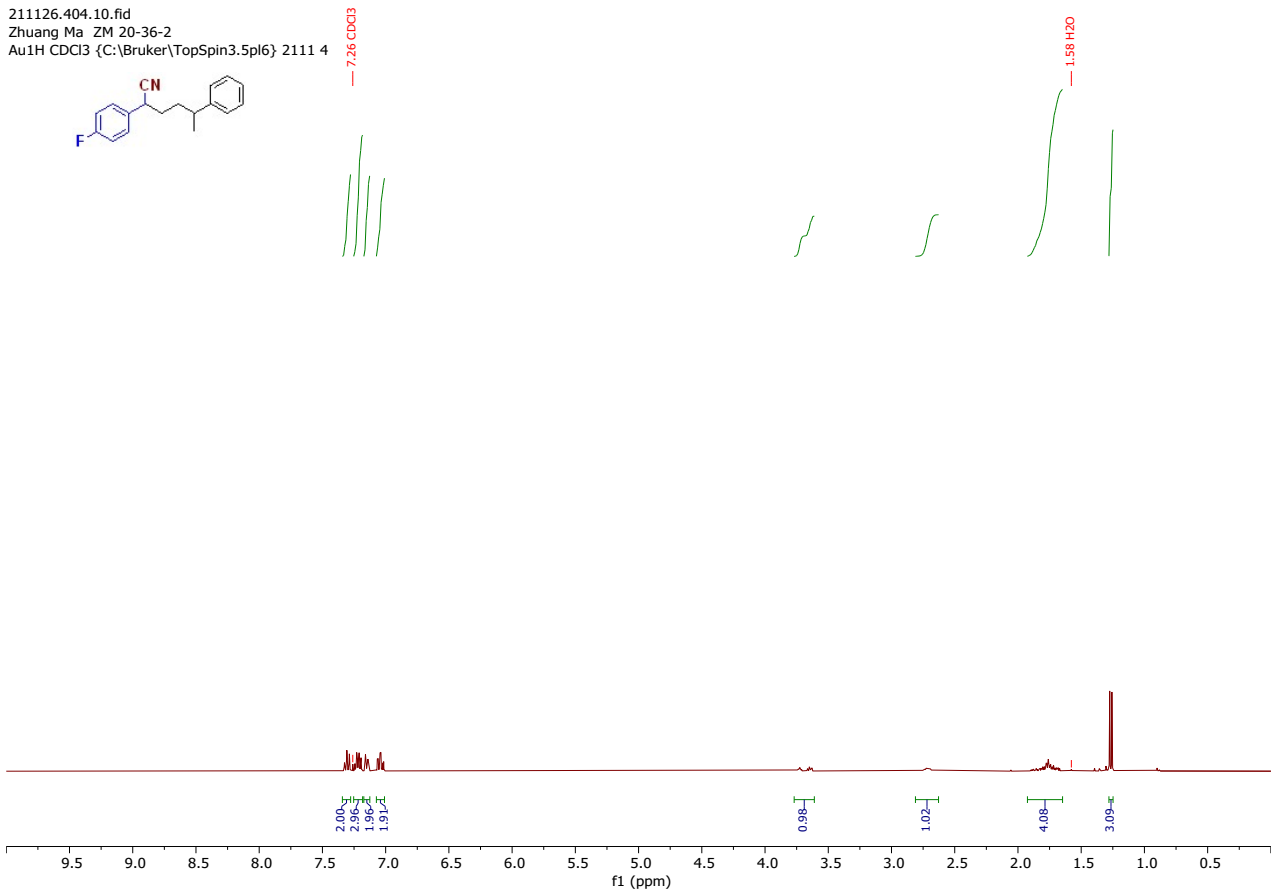

211126.402.11.fid  
Zhuang Ma\_ZM 20-36-1  
Au13C CDCl3 {C:\Bruker\TopSpin3.5pl6} 2111 2

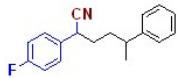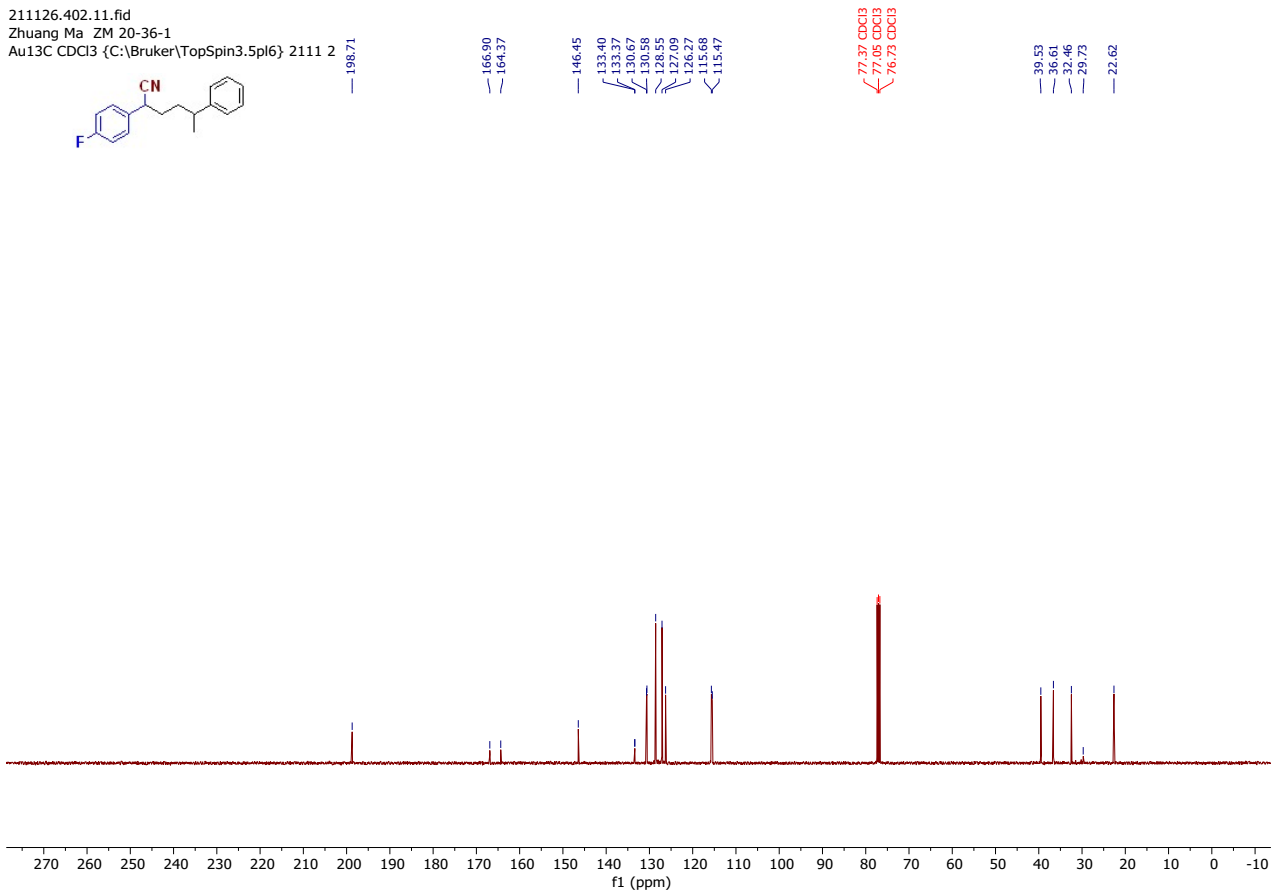

220127.325.10.fid  
Ma/ ZM20-36  
Au19F CDCl3 {C:\Bruker\TopSpin3.6.2} 2201 25

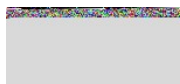

-113.88

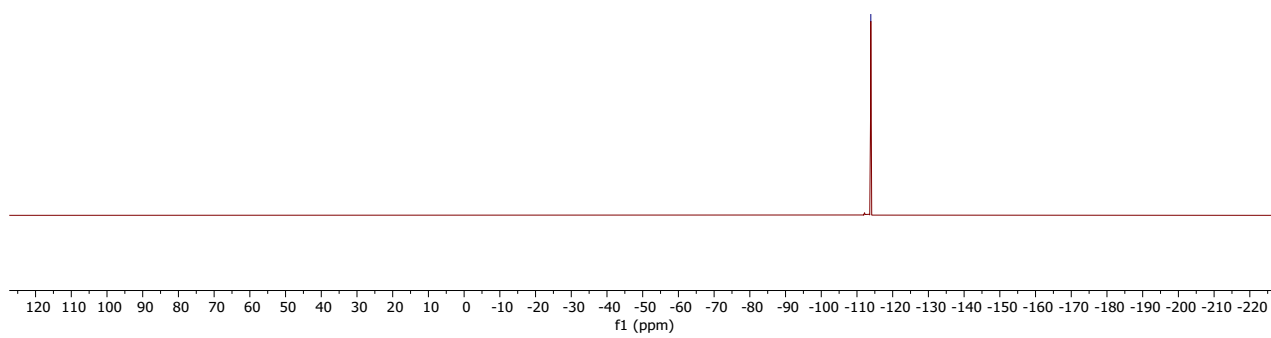

210812.308.10.fid  
Zhuang Ma ZM 20-77  
Au1H CDCl3 {C:\Bruker\TopSpin3.6.2} 2108

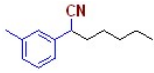

77.49 CDCl3

1.62 H2O

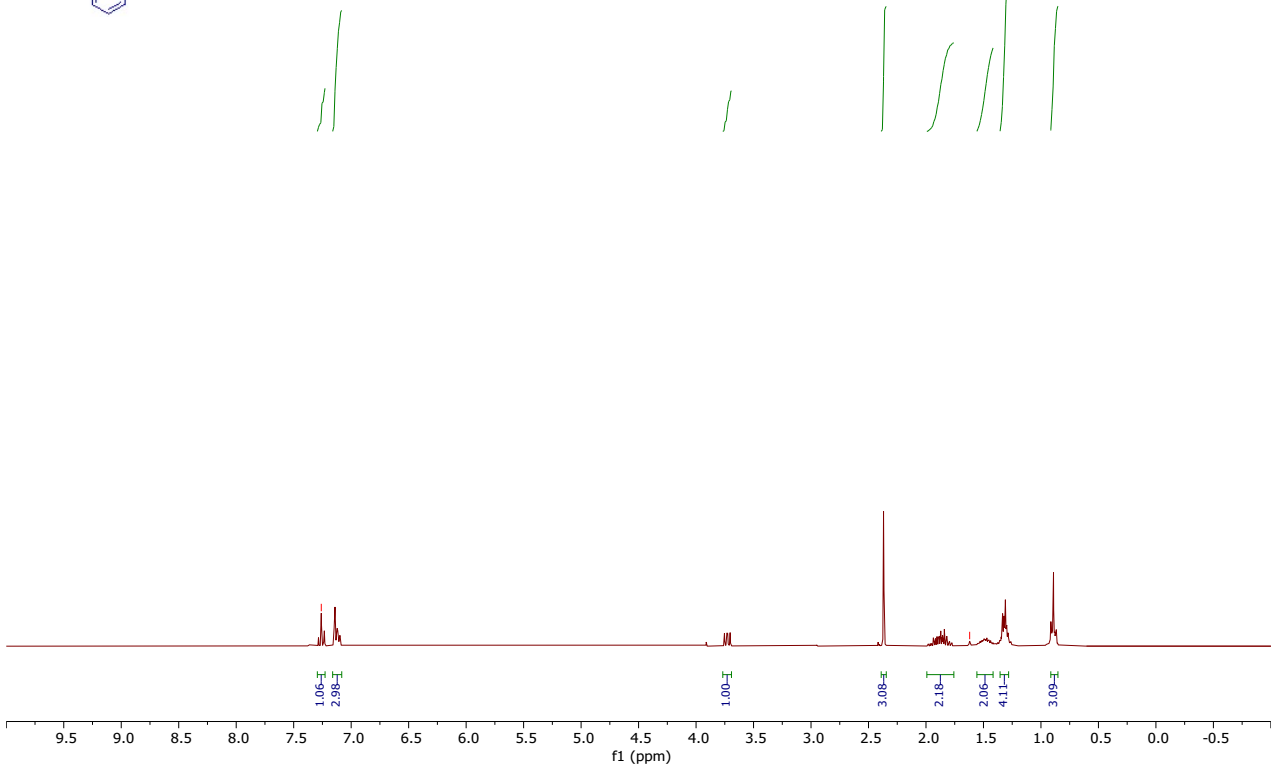

210812.308.11.fid  
Zhuang Ma ZM 20-77  
Au13C CDCl3 {C:\Bruker\TopSpin3.6.2} 2108 8

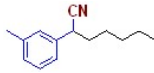

136.87  
136.03  
135.70  
127.91  
124.30  
121.10

77.49 CDCl3  
77.07 CDCl3  
76.64 CDCl3

37.36  
35.92  
31.13  
26.78  
22.37  
21.39  
13.96

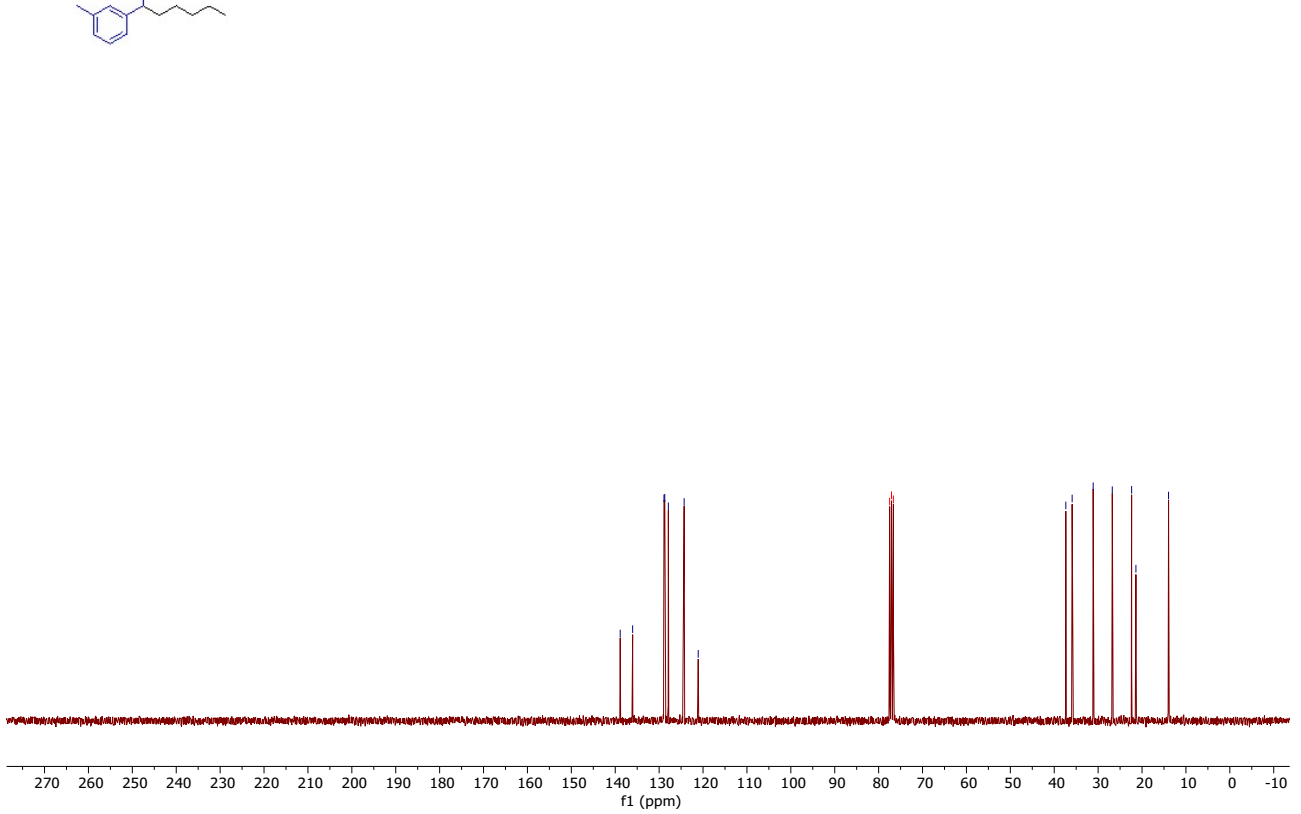

210820.328.10.fid  
Zhuang Ma ZM 20-73  
Au1H CDCl3 {C:\Bruker\TopSpin3.6.2} 2108 28

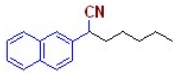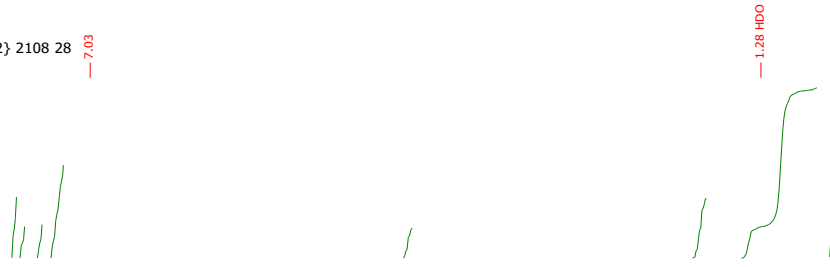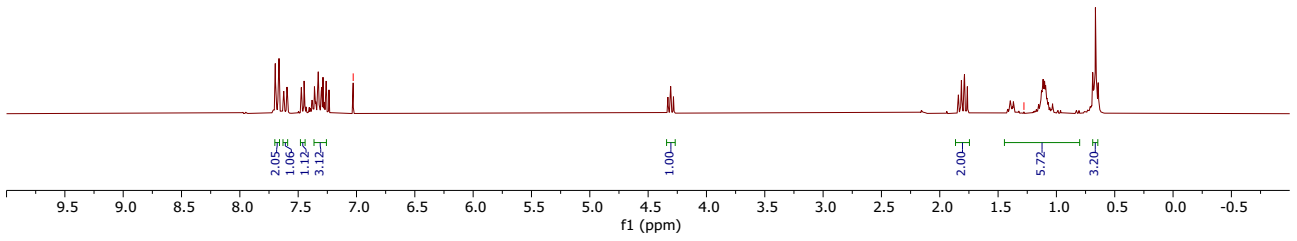

210820.328.11.fid  
Zhuang Ma ZM 20-73  
Au13C CDCl3 {C:\Bruker\TopSpin3.6.2} 2108 28

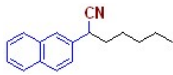

136.72  
134.05  
133.07  
131.91  
129.35  
128.87  
126.87  
126.08  
125.49  
122.09  
121.21

77.48 CDCl3  
77.06 CDCl3  
76.64 CDCl3

34.81  
34.47  
31.16  
27.21  
22.44  
13.97

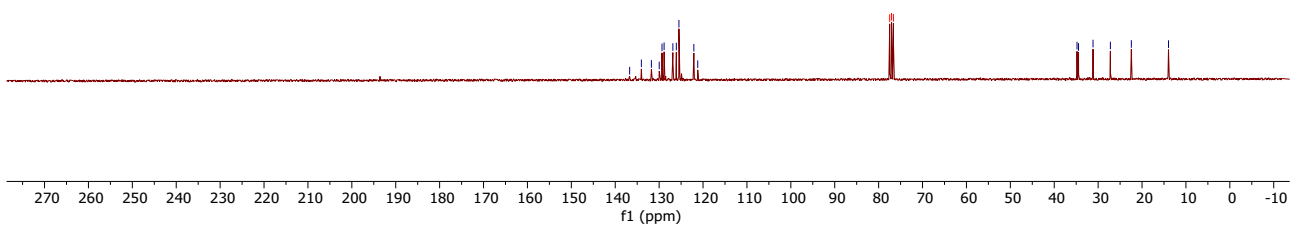



210812.307.10.fid  
Zhuang Ma ZM 20-74  
Au1H CDCl3 {C:\Bruker\TopSpin3.6.2} 2108

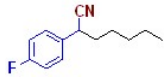

77.47 CDCl3

1.61 H2O

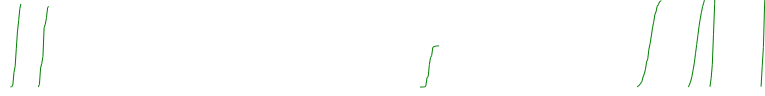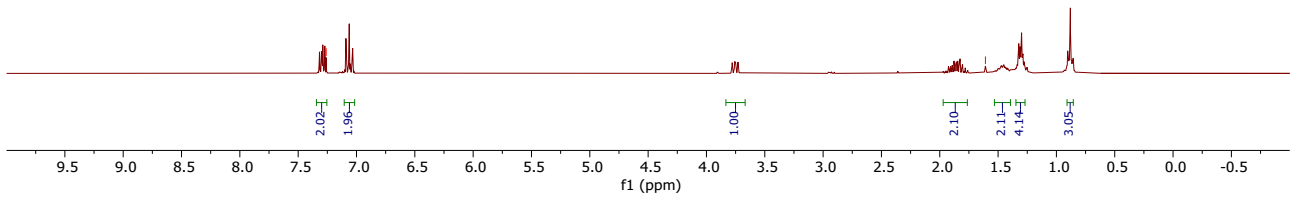

210812.307.11.fid  
Zhuang Ma ZM 20-74  
Au13C CDCl3 {C:\Bruker\TopSpin3.6.2} 2108 7

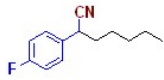

163.97  
160.70

131.86  
131.86  
128.98  
128.87  
120.77  
116.16  
115.87

77.47 CDCl3  
77.05 CDCl3  
76.63 CDCl3

36.70  
35.90  
31.06  
26.63  
22.34  
13.92

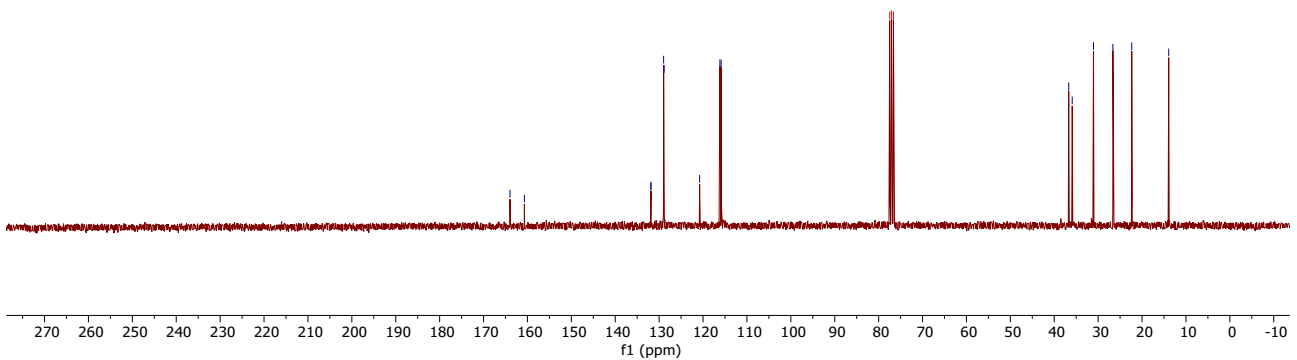

210812.309.10.fid  
Zhuang Ma ZM 20-76  
Au1H CDCl3 {C:\Bruker\TopSpin3.6.2} 2108 9

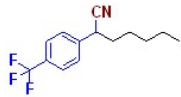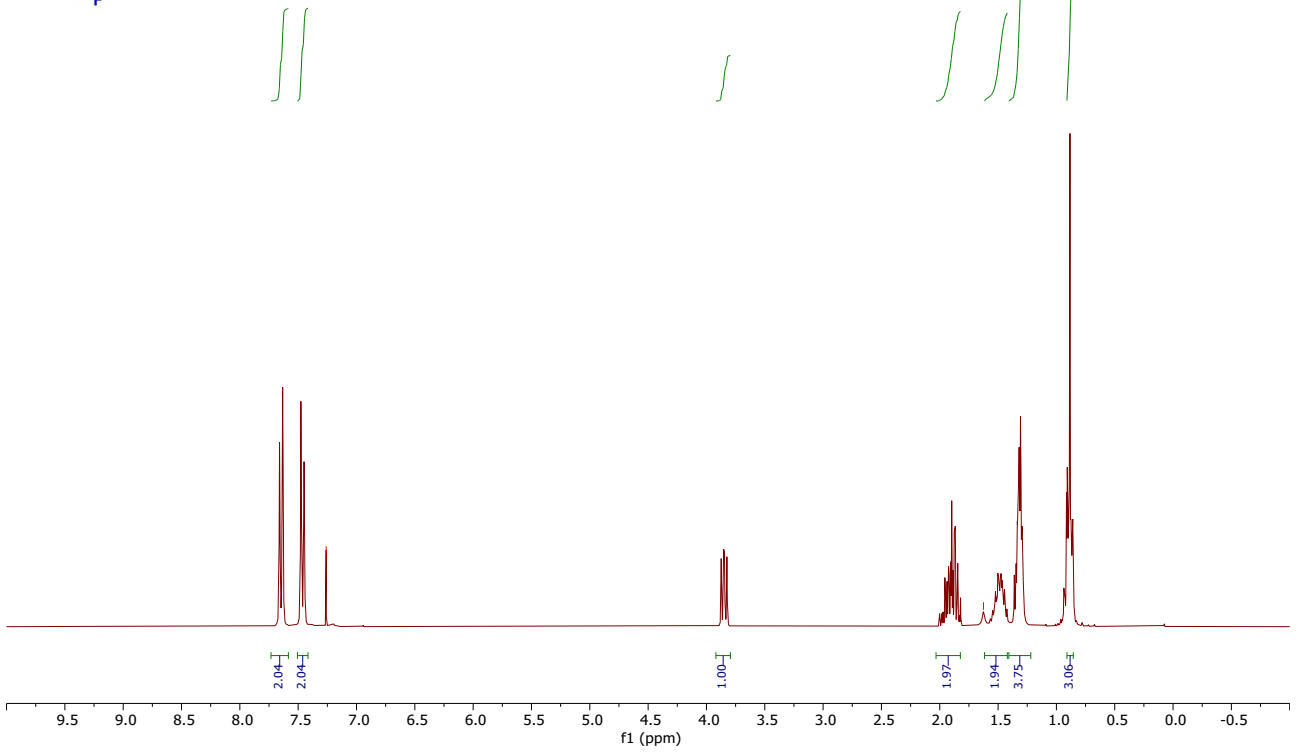

210812.309.11.fid  
Zhuang Ma ZM 20-76  
Au13C CDCl3 {C:\Bruker\TopSpin3.6.2} 2108 9

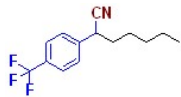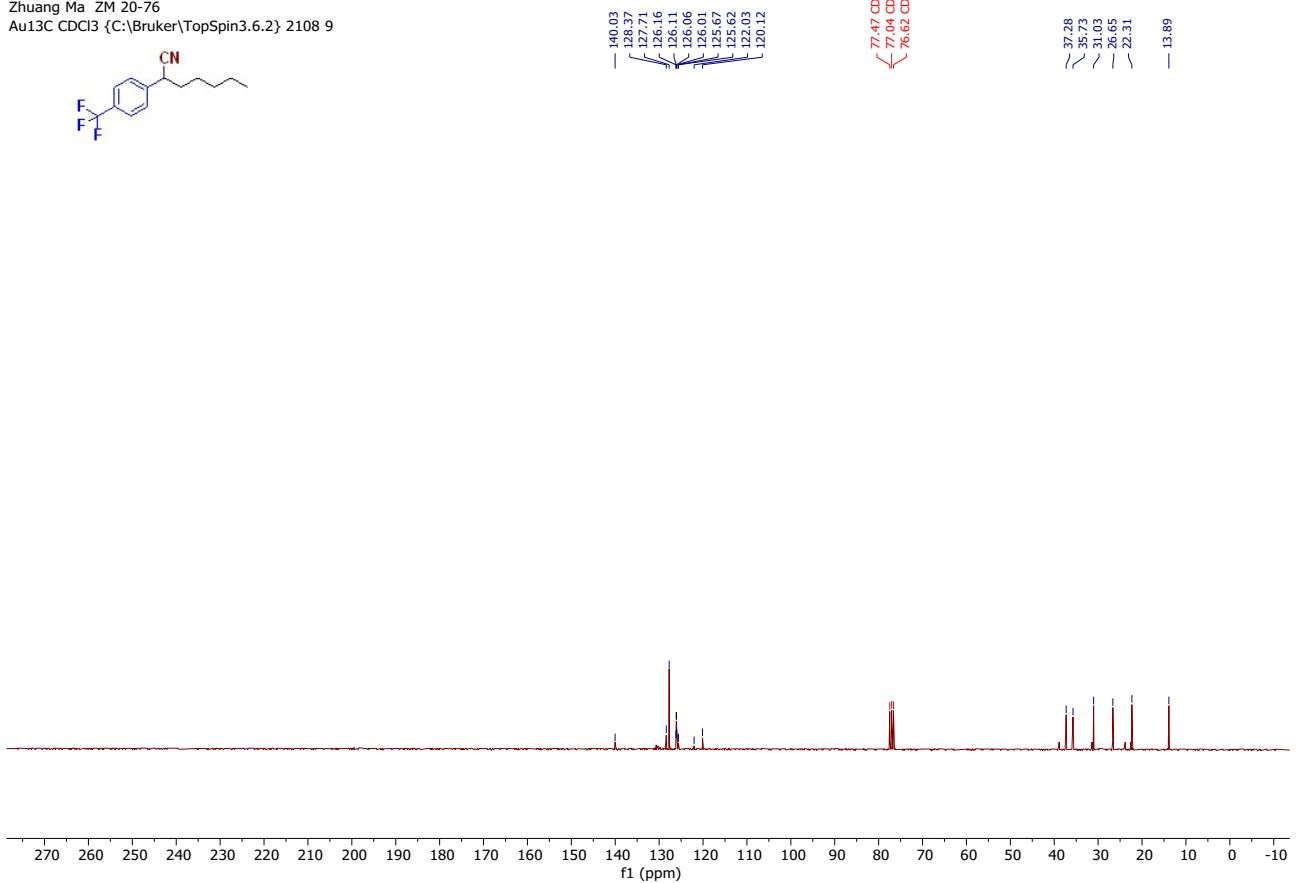

220127.324.10.fid  
Ma/ ZM20-76  
Au19F CDC13 {C:\Bruker\TopSpin3.6.2} 2201 24

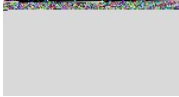

62.71  
63.10

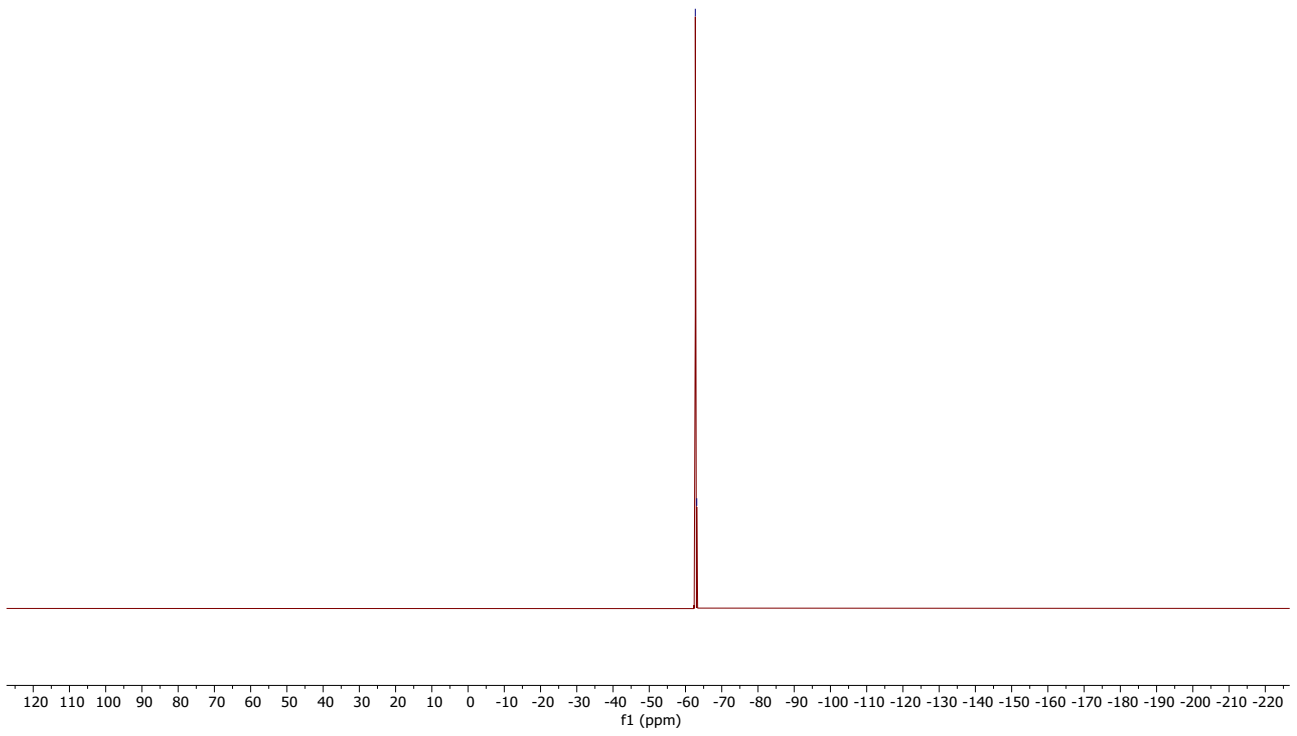

210802.f317.10.fid  
Zhuang Ma ZM 20-71  
PROTON CDCl3 {C:\Bruker\TopSpin3.6.2} 2108 17

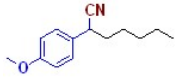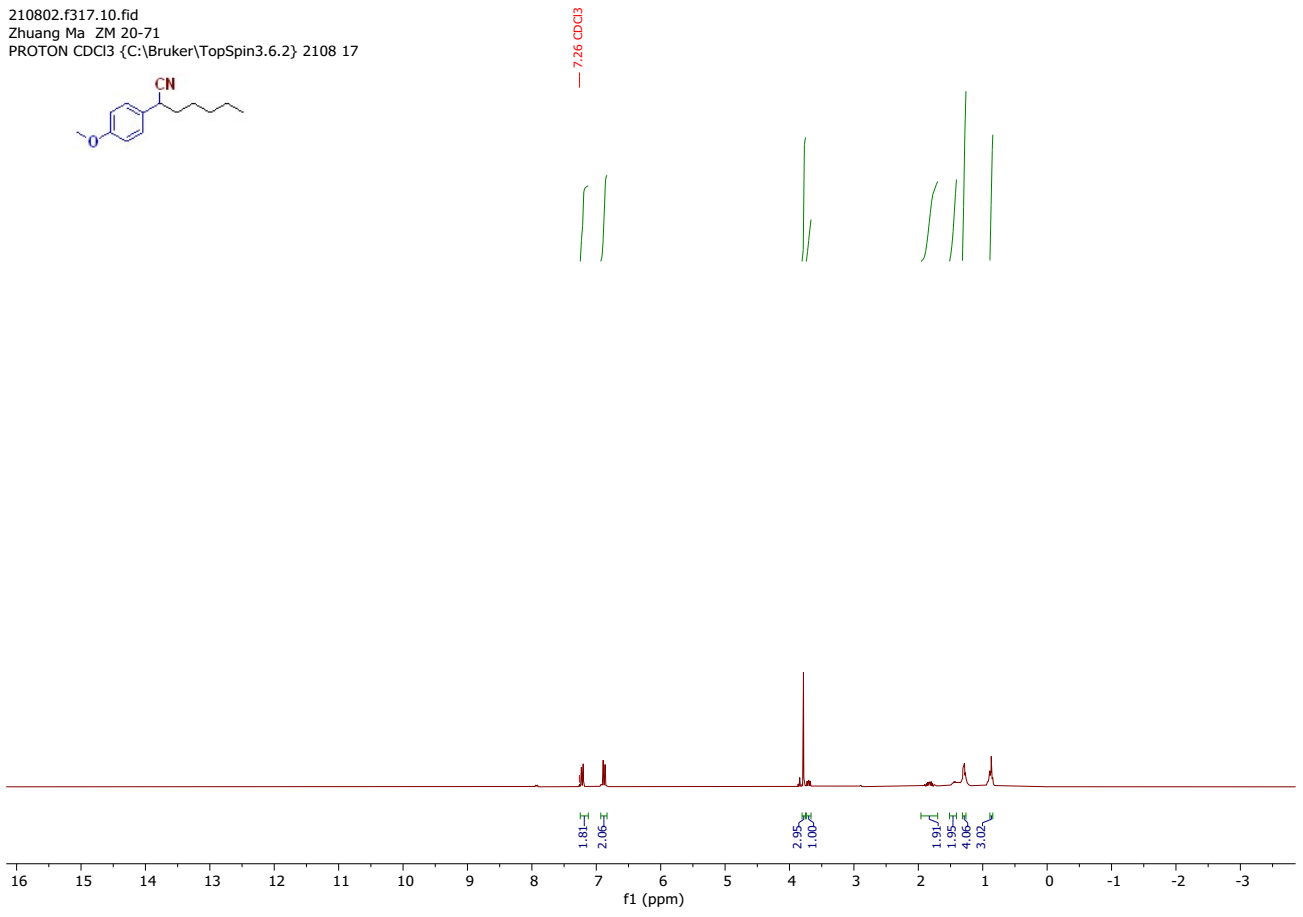

210802.f317.11.fid  
 Zhuang Ma ZM 20-71  
 C13CPD CDCl3 {C:\Bruker\TopSpin3.6.2} 2108 17

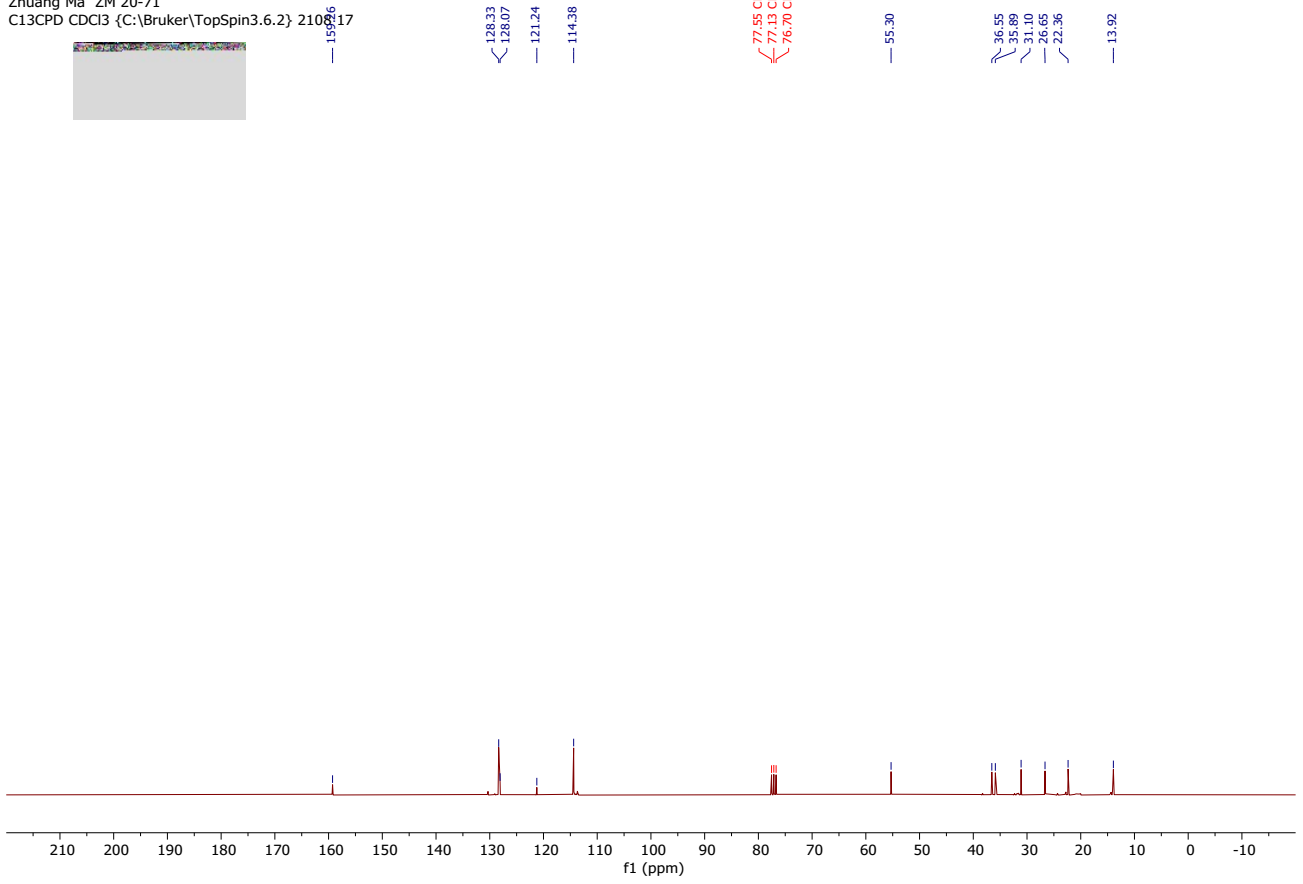

210802.f318.10.fid  
 Zhuang Ma ZM 20-72  
 PROTON CDCl3 {C:\Bruker\TopSpin3.6.2} 2108 18

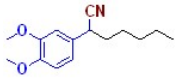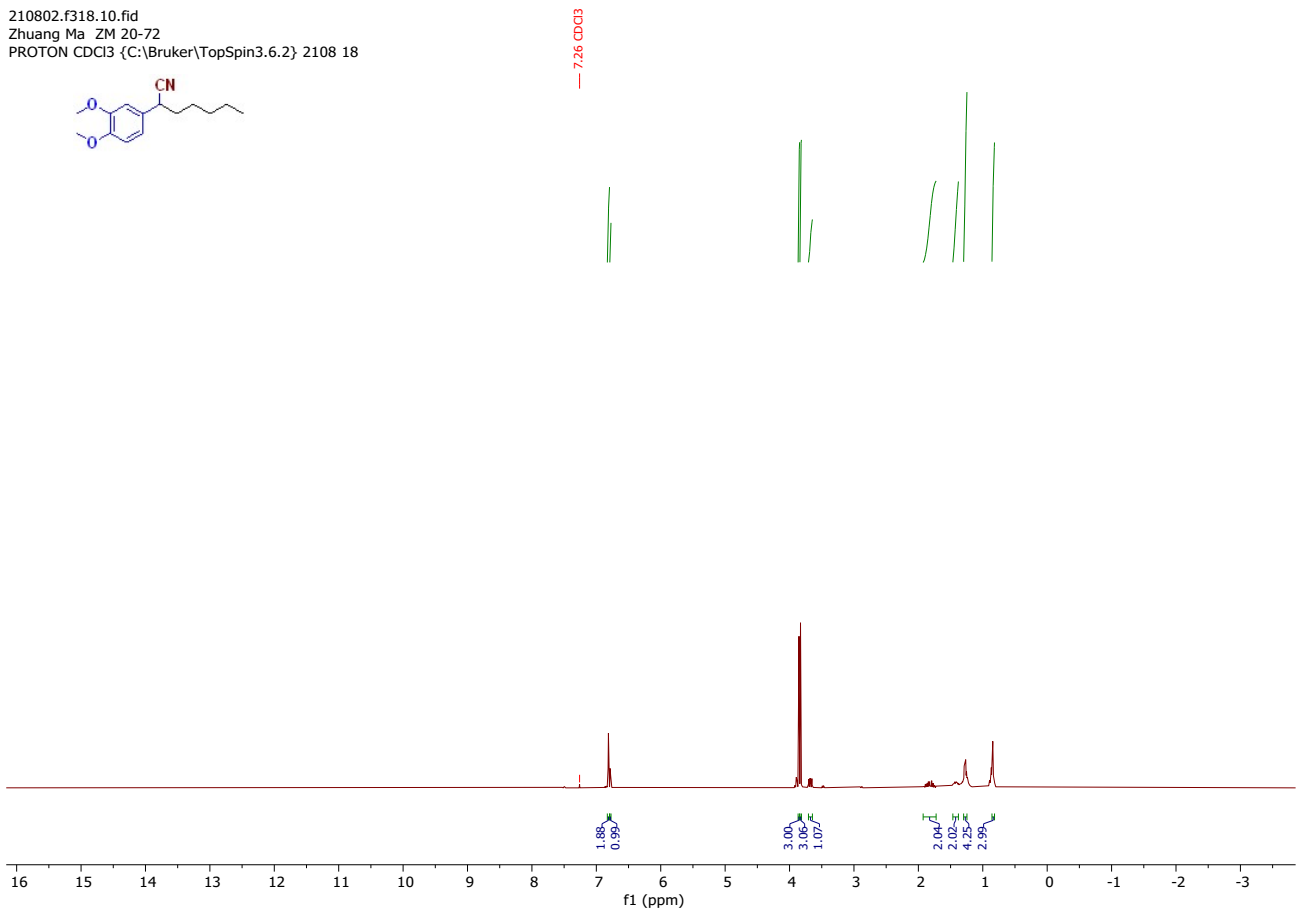

210802.f318.11.fid  
Zhuang Ma\_ZM 20-72  
C13CPD CDCl3 {C:\Bruker\TopSpin3.6.2} 2108 18

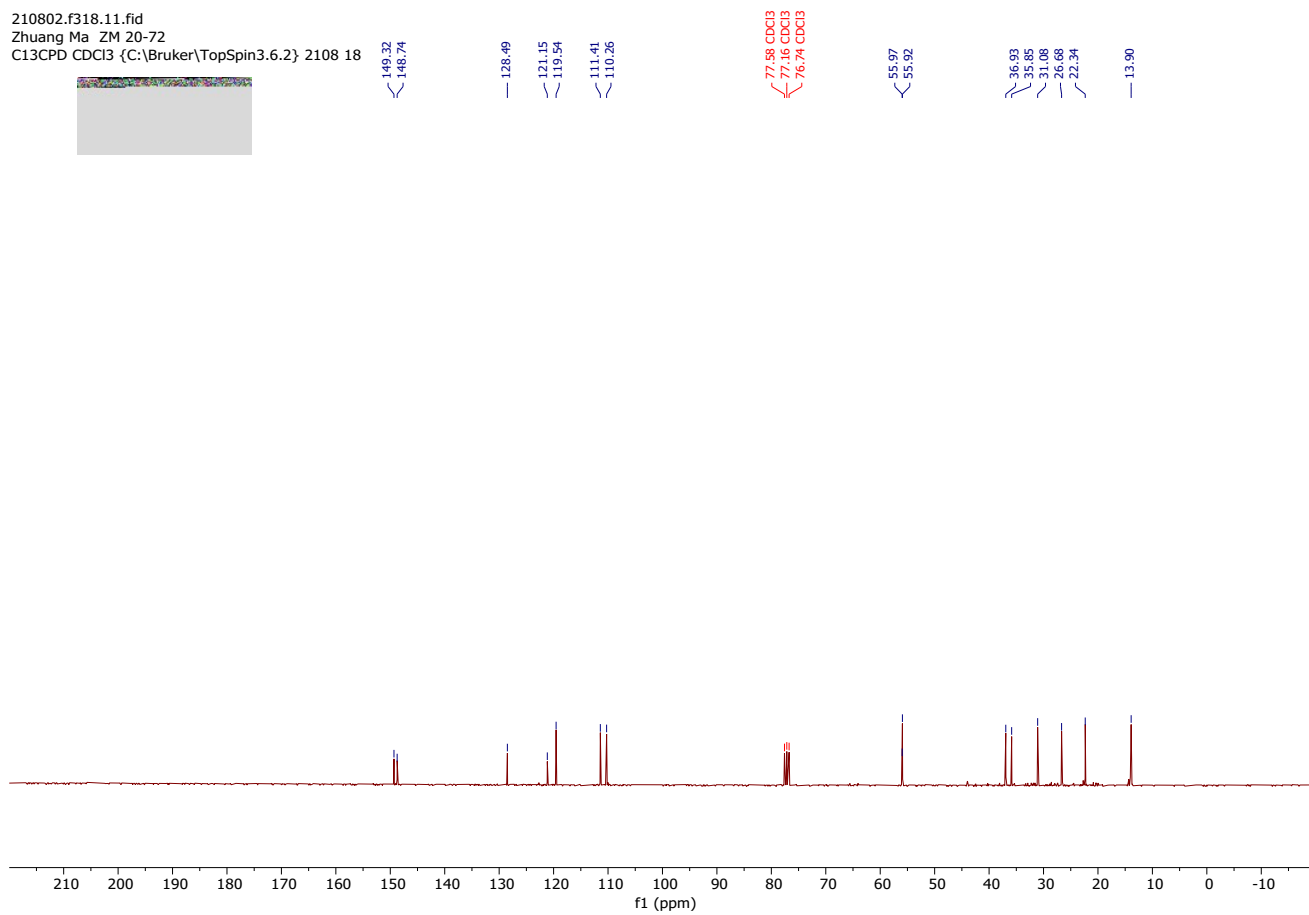

210820.327.10.fid  
Zhuang Ma ZM 20-84  
Au1H CDCl3 {C:\Bruker\TopSpin3.6.2} 2108 27

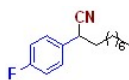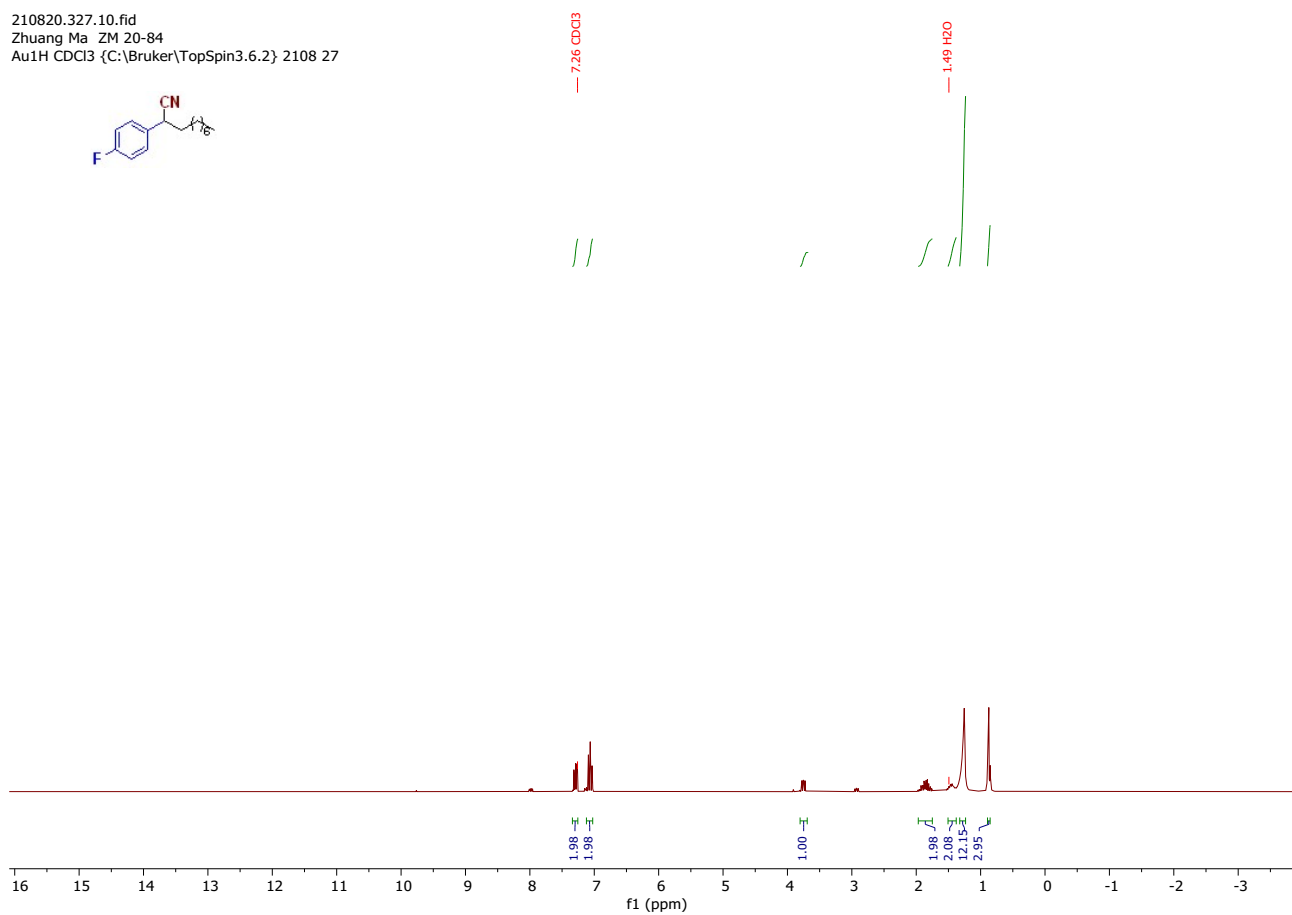

210820.327.11.fid  
Zhuang Ma\_ZM 20-84  
Au13C CDCl3 {C:\Bruker\TopSpin3.6.2} 2108 27

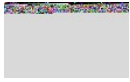

163.97  
160.69

131.89  
131.85  
130.73  
128.89  
128.87  
120.77  
116.15  
115.87  
115.76

77.47 CDCl3  
77.04 CDCl3  
76.62 CDCl3

36.70  
35.94  
34.76  
29.27  
28.14  
28.92  
26.96  
22.62  
14.08

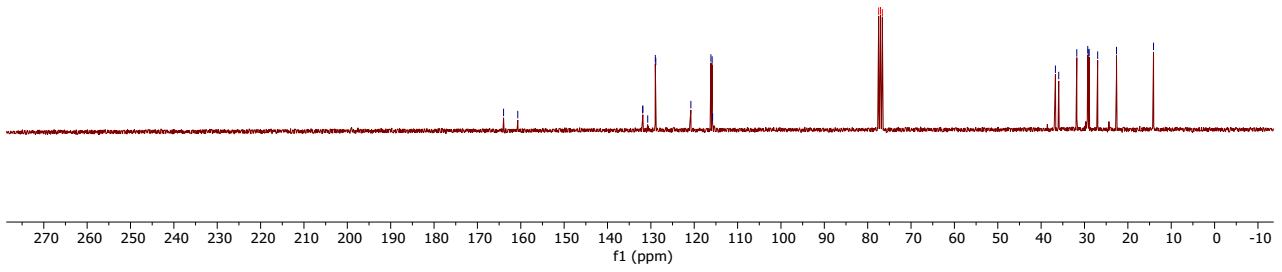

220127.321.10.fid  
Ma/ ZM20-84  
Au19F CDCl3 {C:\Bruker\TopSpin3.6.2} 2201 21

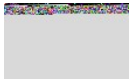

-114.00

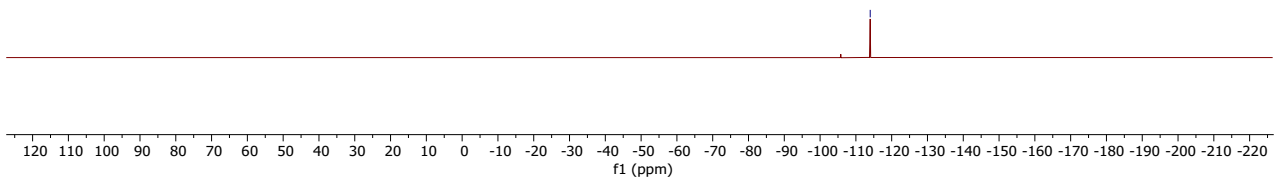



210820.325.10.fid  
Zhuang Ma ZM 20-81  
Au1H CDCl3 {C:\Bruker\TopSpin3.6.2}\2108 25

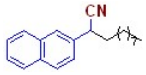

CDCl3

|||/

s

/ / |

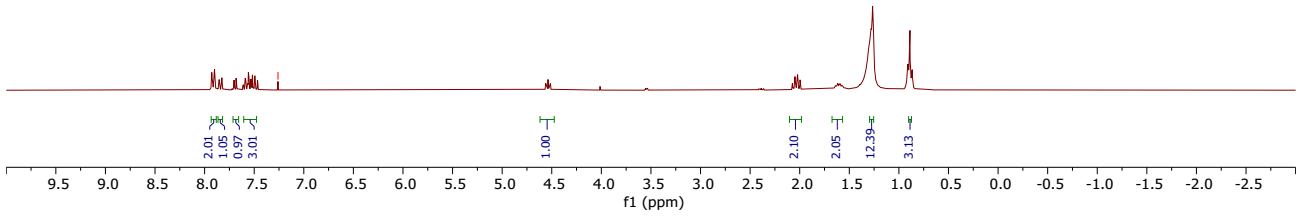

210820.325.11.fid  
Zhuang Ma ZM 20-81  
Au13C CDCl3 {C:\Bruker\TopSpin3.6.2} 2108 25

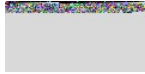

134.05  
131.78  
129.99  
129.34  
128.86  
128.84  
126.86  
126.07  
125.49  
122.10  
121.20

77.50 CDCl3  
77.07 CDCl3  
76.65 CDCl3

34.84  
34.47  
31.86  
29.48  
29.37  
29.27  
29.02  
27.86  
14.13

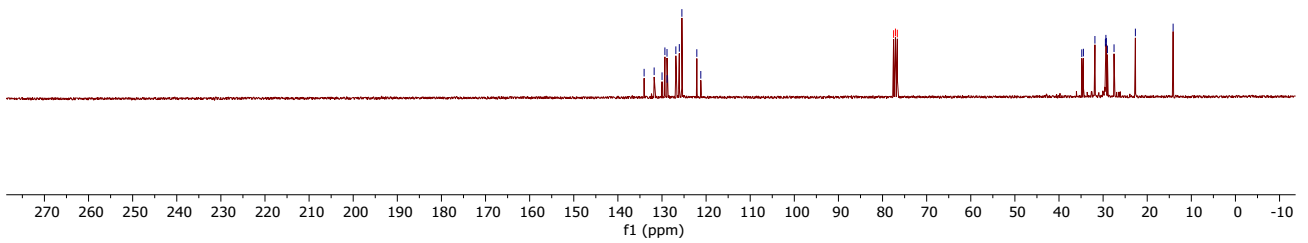

210820.324.10.fid  
Zhuang Ma ZM 20-83  
Au1H CDCl3 {C:\Bruker\TopSpin3.6.2} 2108 24

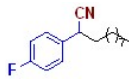

7.19

1.80 H2O

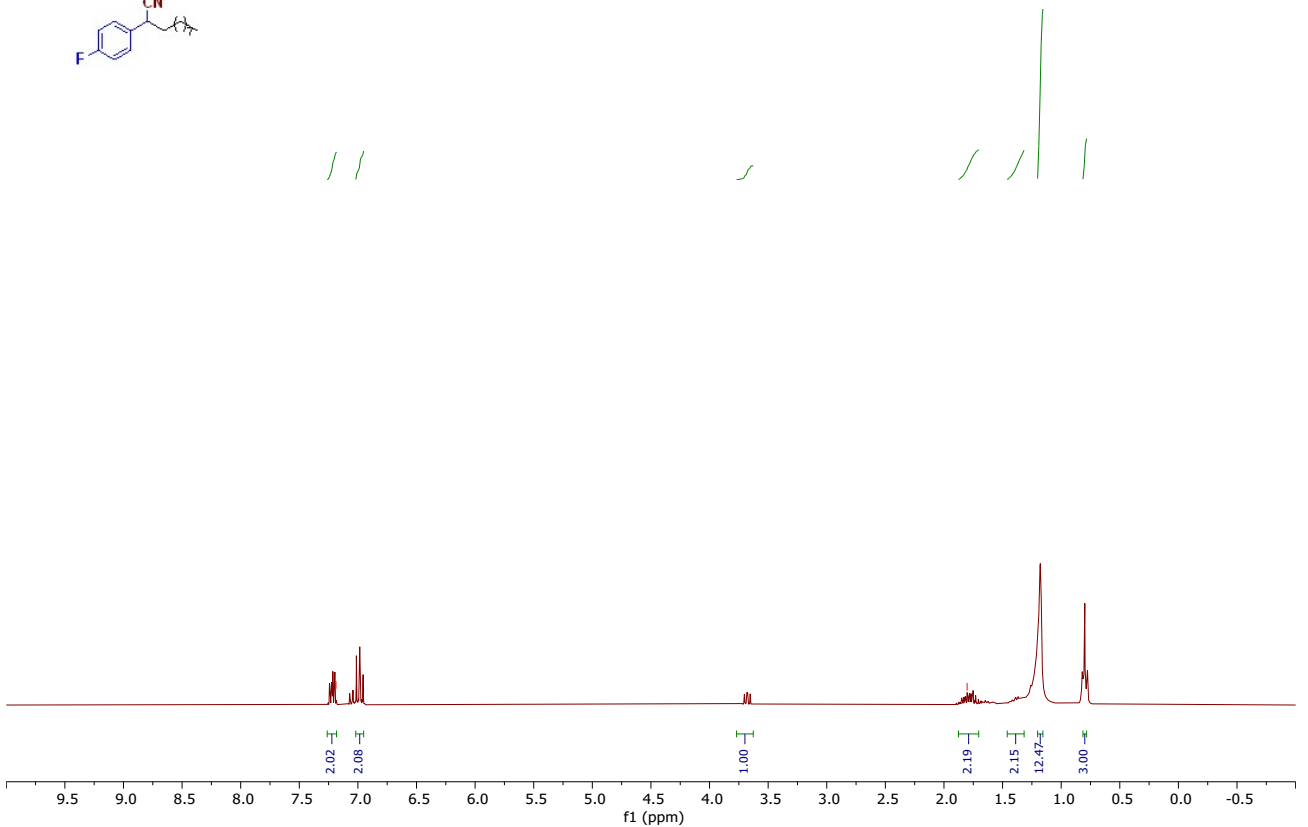

210820.324.11.fid  
Zhuang Ma\_ZM\_20-83  
Au13C CDCl3 {C:\Bruker\TopSpin3.6.2} 2108 24

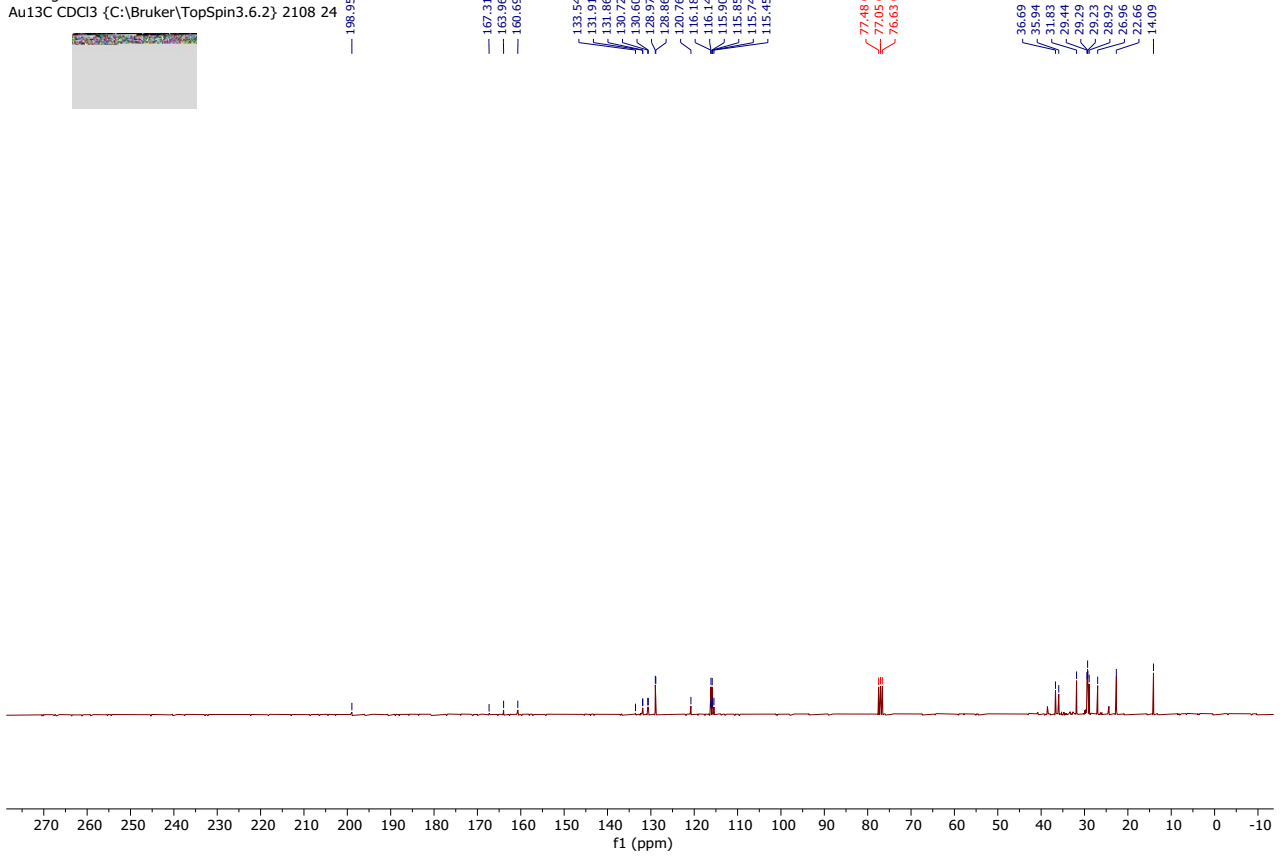

220127.320.10.fid  
Ma/ ZM20-83  
Au19F CDCl3 {C:\Bruker\TopSpin3.6.2} 2201 20

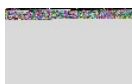

-113.99

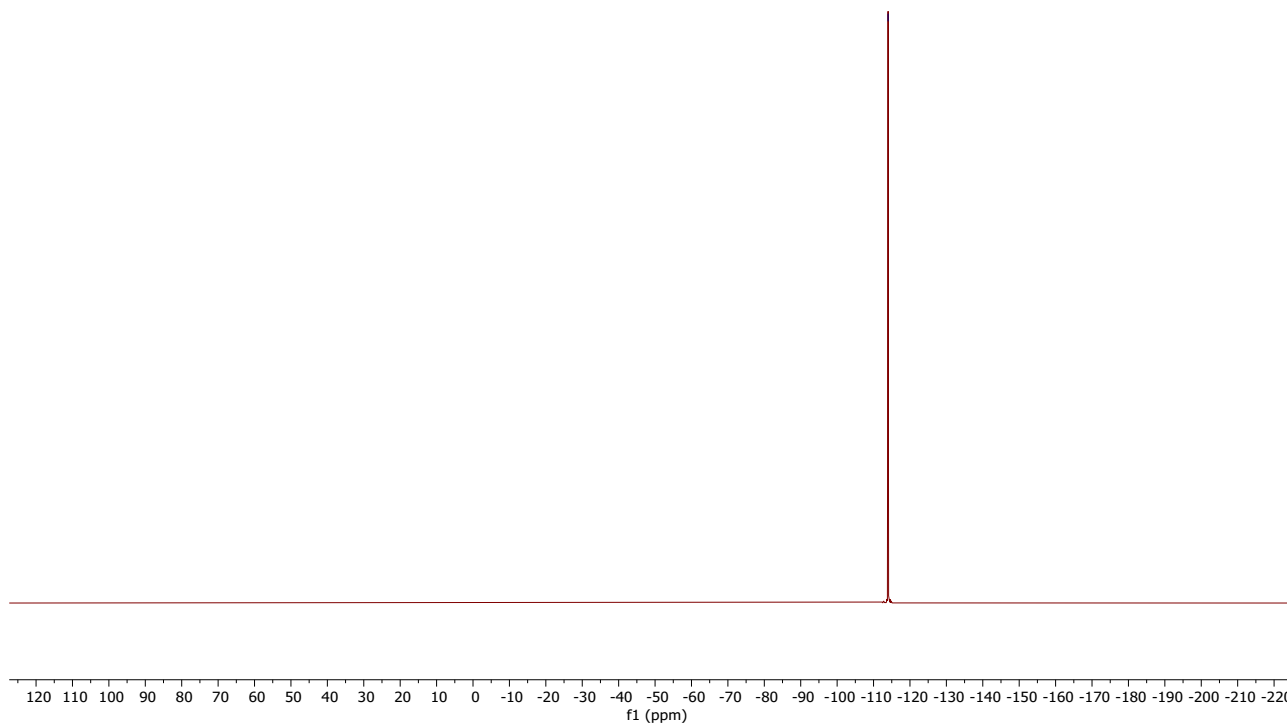

210806.306.10.fid  
Zhuang Ma ZM 20-74  
Au1H CDCl3 {C:\Bruker\TopSpin3.6.2} 2108 6

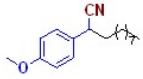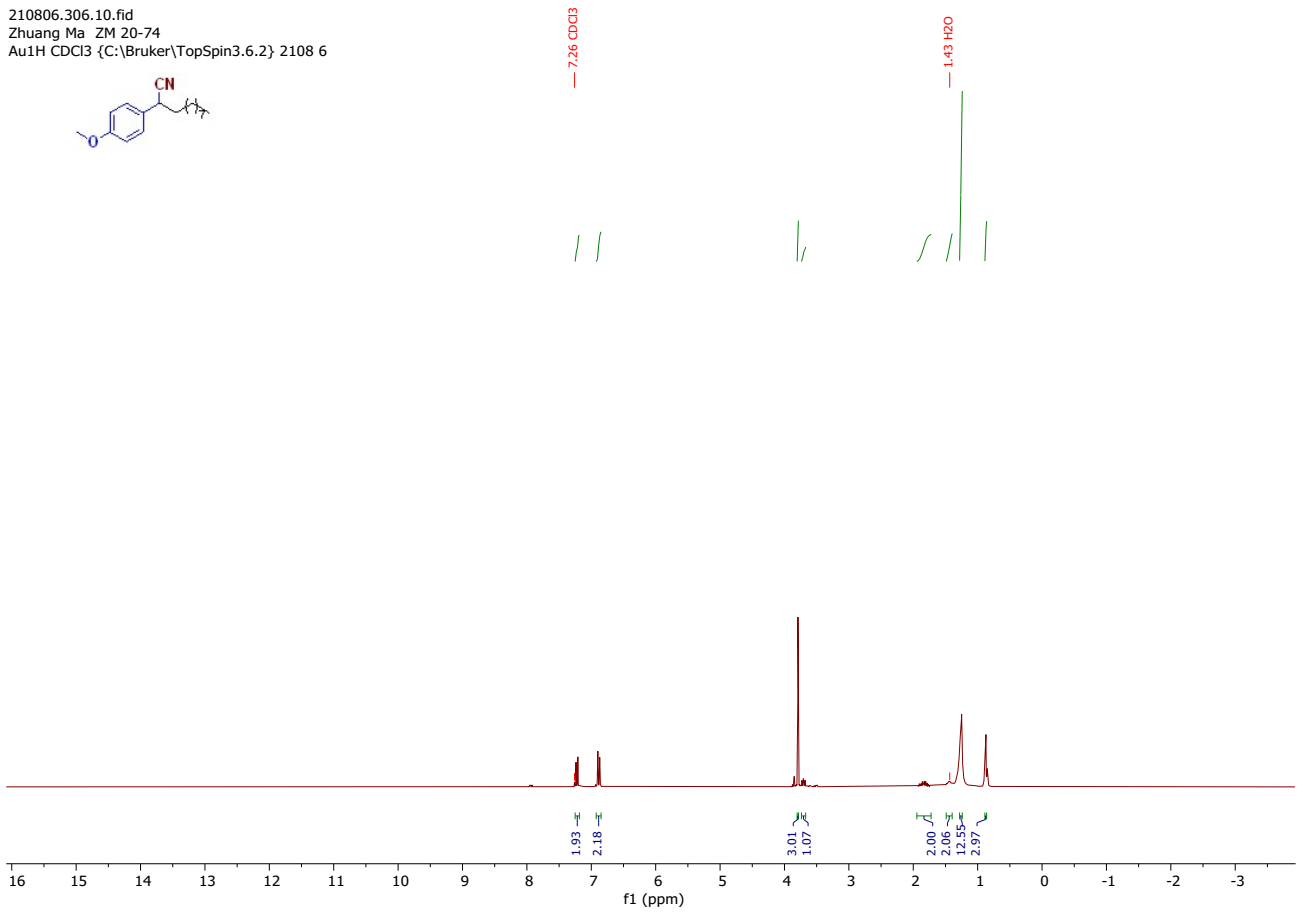

210806.306.11.fid  
 Zhuang Ma ZM 20-74  
 Au13C CDCl3 {C:\Bruker\TopSpin3.6.2} 2108 6

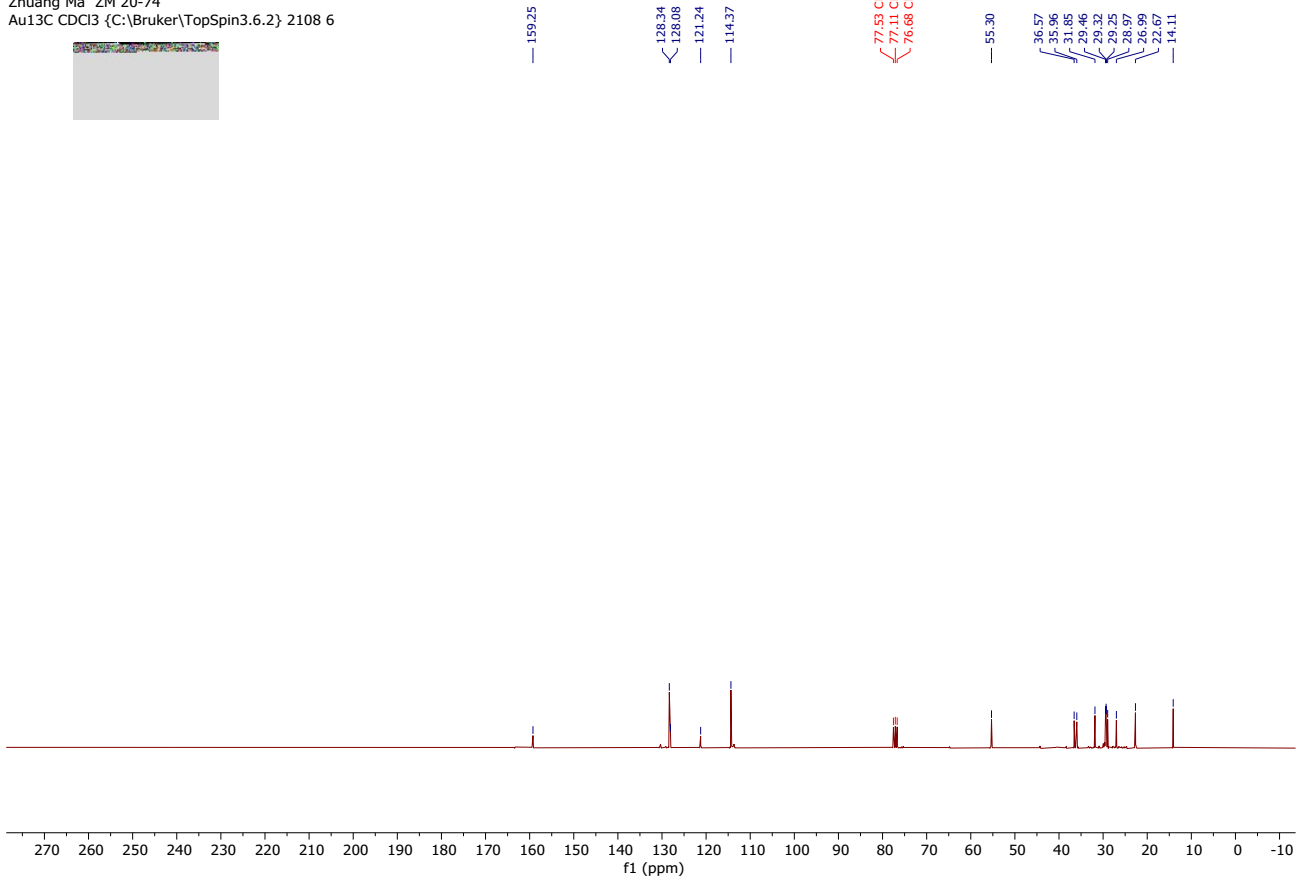

210823.326.10.fid  
 Zhuang Ma ZM 20-80  
 Au1H CDCl3 {C:\Bruker\TopSpin3.6.2} 2108 26

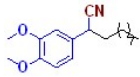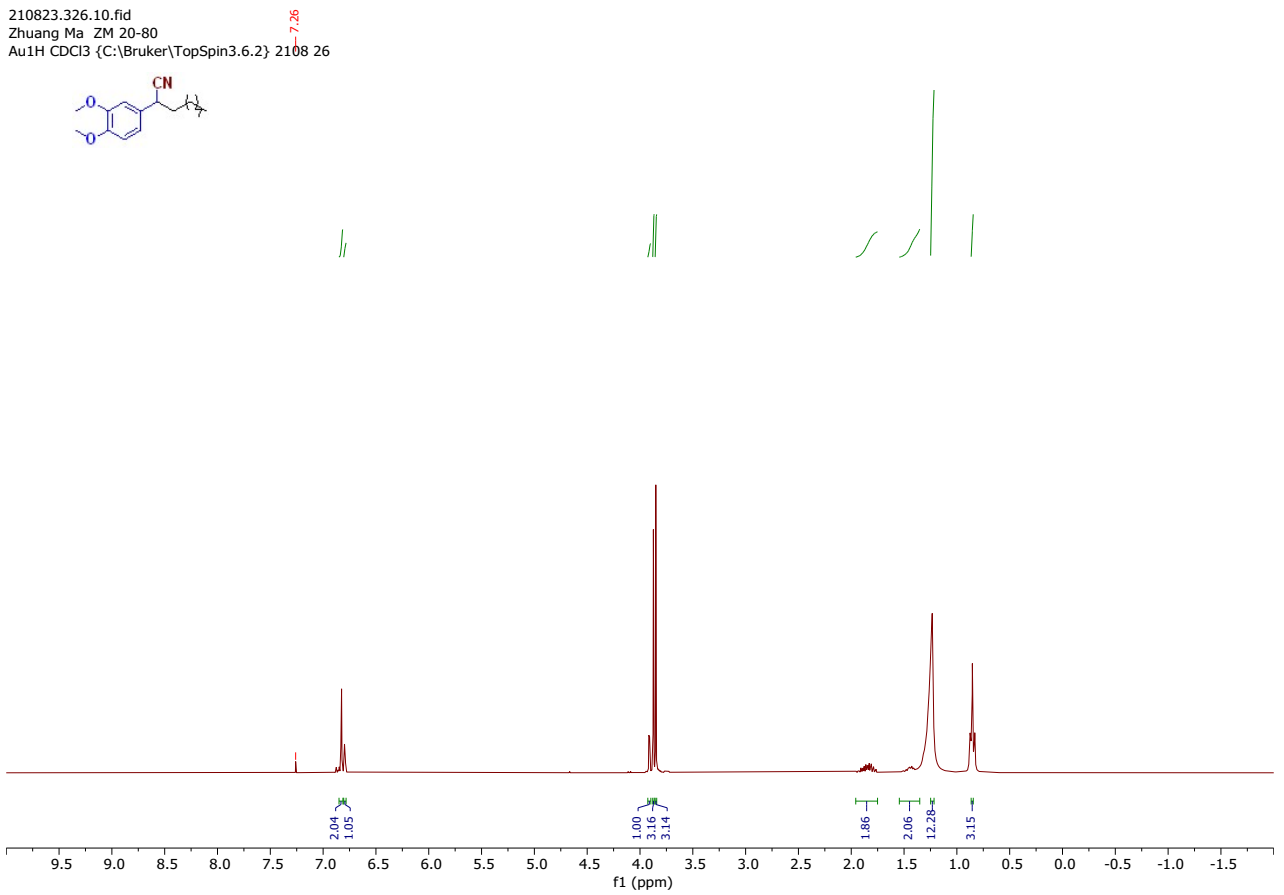

210823.326.11.fid  
Zhuang Ma ZM 20-80  
Au13C CDCl3 {C:\Bruker\TopSpin3.6.2} 2108 26

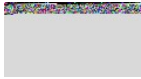

149.32  
148.72  
128.49  
121.16  
119.94  
111.36  
110.20  
77.53 CDCl3  
77.11 CDCl3  
76.69 CDCl3  
55.96  
55.92  
36.97  
35.94  
31.83  
29.44  
29.31  
28.86  
27.04  
22.65  
14.09

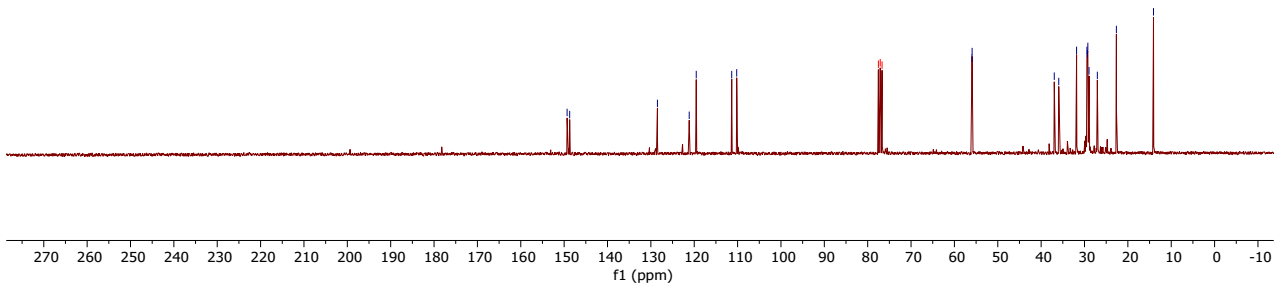

211201.311.10.fid  
Zhuang Ma ZM 20-107  
Au1H CDCl3 {C:\Bruker\TopSpin3.6.2} 2112 11

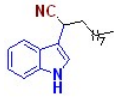

7.26 CDCl3

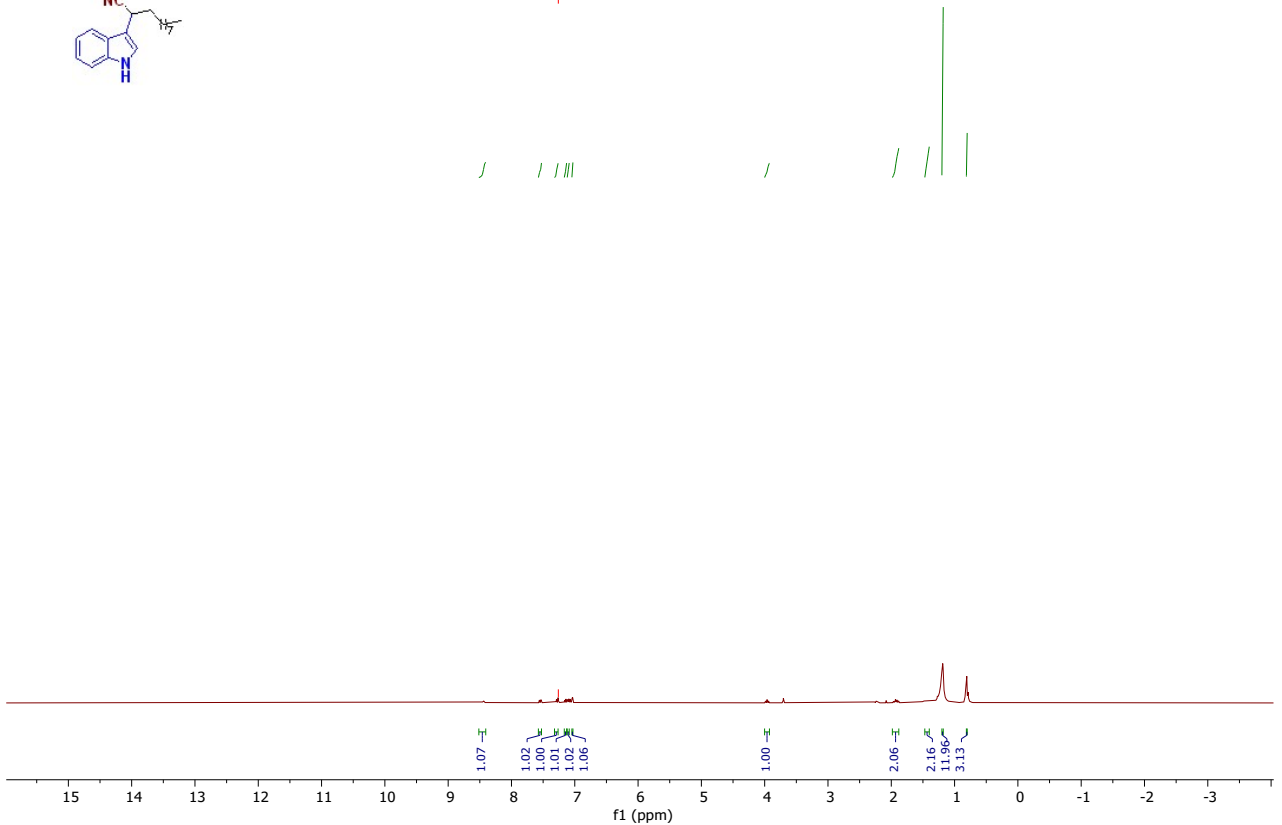

211201.311.11.fid  
 Zhuang Ma ZM 20-107  
 Au13C CDCl3 {C:\Bruker\TopSpin3.6.2} 2112 11

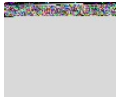

136.54  
 125.32  
 122.56  
 122.38  
 121.44  
 119.98  
 118.39  
 111.76  
 110.56

77.56 CDCl3  
 77.13 CDCl3  
 76.71 CDCl3

33.98  
 31.90  
 29.54  
 29.43  
 29.31  
 28.93  
 27.27  
 22.71  
 14.16

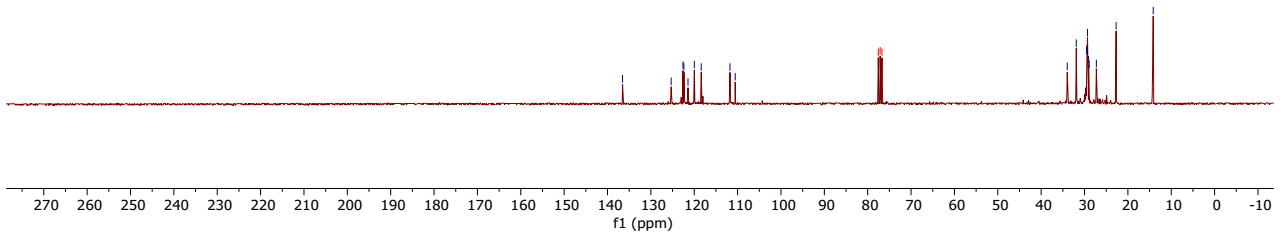

211129.f303.10.fid  
 Zhuang Ma ZM 20-108  
 PROTON CDCl3 {C:\Bruker\TopSpin3.6.2} 2111 3

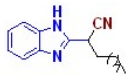

7.26 CDCl3

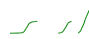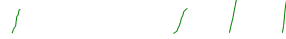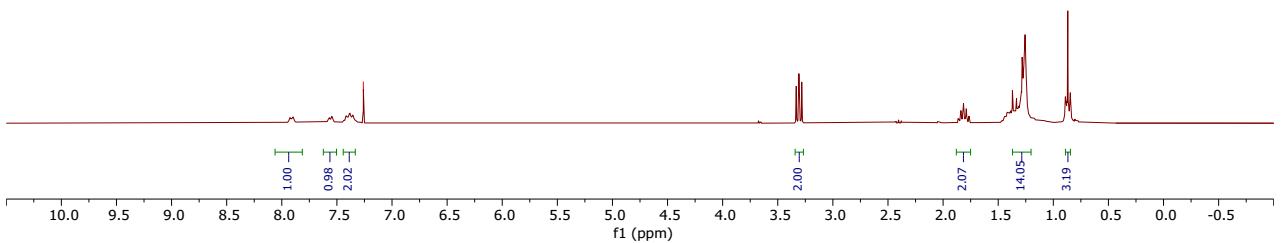

1.00  
 0.98  
 2.02

2.00  
 2.07  
 14.05  
 3.19



211129.f303.11.fid  
Zhuang Ma ZM 20-108  
C13CPD CDCl3 {C:\Bruker\TopSpin3.6.2} 2111 3

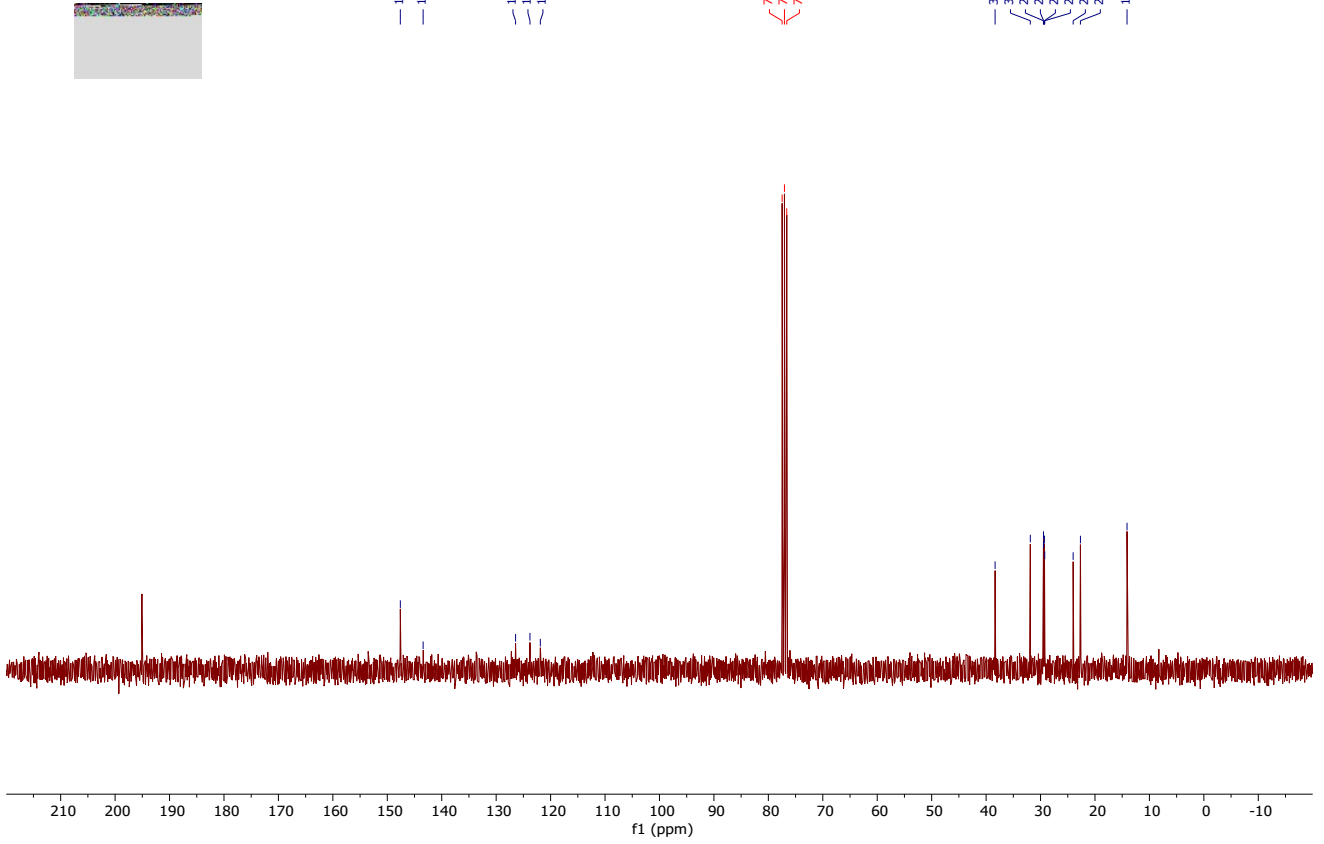

Supplement: d3gc04436j1.pdf [file d3gc04436j1.pdf]
